# Supplementary material for: Sequential radical and cationic reactivity at separated sites within one molecule in solution
Source: Royal Society of Chemistry journal article supplement (doi:10.1039/d4sc00201f), 2024-01-01
Supplement: d4sc00201f1.pdf [file d4sc00201f1.pdf]

# Supporting Information

## S1: Synthetic Details

## S2: X-Ray Diffraction Studies

## S3: EPR analysis

## S4: Theoretical Details

## S5: References

### S1: Synthetic Details

**General:** All manipulations were performed under an inert atmosphere of dry nitrogen, using standard Schlenk techniques. Dry, oxygen-free solvents were employed unless otherwise mentioned. The compound **IDP** and **1b** were prepared following reported procedure,<sup>[1]</sup> while all other starting materials were purchased from commercial sources. NMR spectra were recorded on Bruker Avance 400 MHz spectrometers (<sup>1</sup>H, 400.1 MHz; <sup>13</sup>C, 100.5 MHz; <sup>19</sup>F, 376.3 MHz; <sup>31</sup>P, 161.9 MHz). All spectra were obtained in the solvent indicated at 25 °C. The chemical shifts ( $\delta$ ) were measured according to IUPAC and expressed in ppm relative to SiMe<sub>4</sub> (<sup>1</sup>H, <sup>13</sup>C), and 85% H<sub>3</sub>PO<sub>4</sub> (<sup>31</sup>P). Coupling constants *J* are reported in Hertz [Hz] as absolute values. Because of high sensitivity of these compounds or the contamination of solvents, the elemental analyses gave unsatisfying results. The high purity of these isolated compounds has been proved mainly by NMR or EPR spectra. UV/vis spectra were measured on Shimadzu UV/vis/NIR UV-3600-spectrometer. ESI-MS spectra were measured on Bruker ESI-Q-TOF maxis 4G. Melting point (M. P.) were measured on Buchi M-560 apparatus.

**Preparation of 1a:** Tert-butyl-3-phenylpropiolate (1.0 equivalent) was added to a stirred solution of **IDP** (86.7 mg, 0.1 mmol) in Tol (4 mL) at room temperature and then heated to 110°C. After stirring for overnight, the solvent was removed under reduced pressure. The remaining solid was washed with acetonitrile and dried *in vacuo* to afford **1a** as yellowish powder, 101.8 mg, 0.095 mmol, 95.0% yield. Yellowish crystals of **1a** were obtained from a saturated hexane solution via slow evaporation at room temperature. M. P. > 250 °C. <sup>1</sup>H NMR (C<sub>6</sub>D<sub>6</sub>, 400 MHz): δ = 7.21 (m, 2 H, C<sub>ar</sub>H), 7.15 (m, 5 H, C<sub>ar</sub>H), 7.13 (m, 3 H, C<sub>ar</sub>H), 7.02 (m, 3 H, C<sub>ar</sub>H), 6.84 (d, *J* = 8.0 Hz, 2 H, C<sub>ar</sub>H), 6.61 (d, *J* = 8.0 Hz, 2 H, C<sub>ar</sub>H), 3.57 (m, 4 H, CHMe<sub>2</sub>), 3.41 (m, 2 H, NCH<sub>2</sub>), 3.31 (m, 2 H, NCH<sub>2</sub>), 3.22 (m, 2 H, NCH<sub>2</sub>), 3.12 (m, 2 H, NCH<sub>2</sub>), 3.06 (m, 2 H, CHMe<sub>2</sub>), 2.98 (m, 2 H, CHMe<sub>2</sub>), 1.43 (d, *J* = 8.0 Hz, 11 H, CH<sub>3</sub>), 1.37 (s, 11 H, CH<sub>3</sub>), 1.29 (m, 17 H, CH<sub>3</sub>), 1.09 (d, *J* = 8.0 Hz, 6 H, CH<sub>3</sub>), 0.97 (d, *J* = 8.0 Hz, 6 H, CH<sub>3</sub>), 0.69 (d, *J* = 8.0 Hz, 6 H, CH<sub>3</sub>); <sup>13</sup>C {<sup>1</sup>H} NMR (C<sub>6</sub>D<sub>6</sub>, 100.5 MHz): δ = 191.7 (d, <sup>2</sup>*J*<sub>PC</sub> = 40.2 Hz, PCCO), 169.3 (d, <sup>1</sup>*J*<sub>PC</sub> = 40.2 Hz, PCC<sub>ar</sub>), 148.3 (s, C<sub>ar</sub>), 148.0 (s, C<sub>ar</sub>), 147.6 (s, C<sub>ar</sub>), 144.3 (t, <sup>1</sup>*J*<sub>PC</sub> = 40.2 Hz, PCC), 139.4 (s, C<sub>ar</sub>), , 127.9 (s, C<sub>ar</sub>), 127.7 (s, C<sub>ar</sub>), 127.4 (s, C<sub>ar</sub>), 124.7 (s, C<sub>ar</sub>), 124.4 (s, C<sub>ar</sub>), 102.5 (t, <sup>1</sup>*J*<sub>PC</sub> = 10.1 Hz, PCC), 78.4 (s, OCtBu), 52.1 (s, NCH<sub>2</sub>), 28.2 (CH<sub>3</sub>), 27.9 (CH<sub>3</sub>), 27.7 (CH<sub>3</sub>), 25.6 (CH<sub>3</sub>), 25.3 (CH<sub>3</sub>), 25.1 (CH<sub>3</sub>), 25.0 (CH<sub>3</sub>), 24.0 (CH<sub>3</sub>), 22.5 (CH<sub>3</sub>). <sup>31</sup>P {<sup>1</sup>H} NMR (C<sub>6</sub>D<sub>6</sub>, 161.9 MHz) δ = 158.9 (d, *J* = 6.5 Hz), 153.8 (d, *J* = 6.5 Hz). UV/Vis (THF, λ (nm) ε (M<sup>-1</sup>cm<sup>-1</sup>)): 282 (4190.5), 332 (2501.3); ESI-MS [M+H]<sup>+</sup> C<sub>69</sub>H<sub>90</sub>N<sub>4</sub>O<sub>2</sub>P<sub>2</sub><sup>+</sup> calc. 1069.661 m/z, found 1069.660 [M+H]<sup>+</sup>.

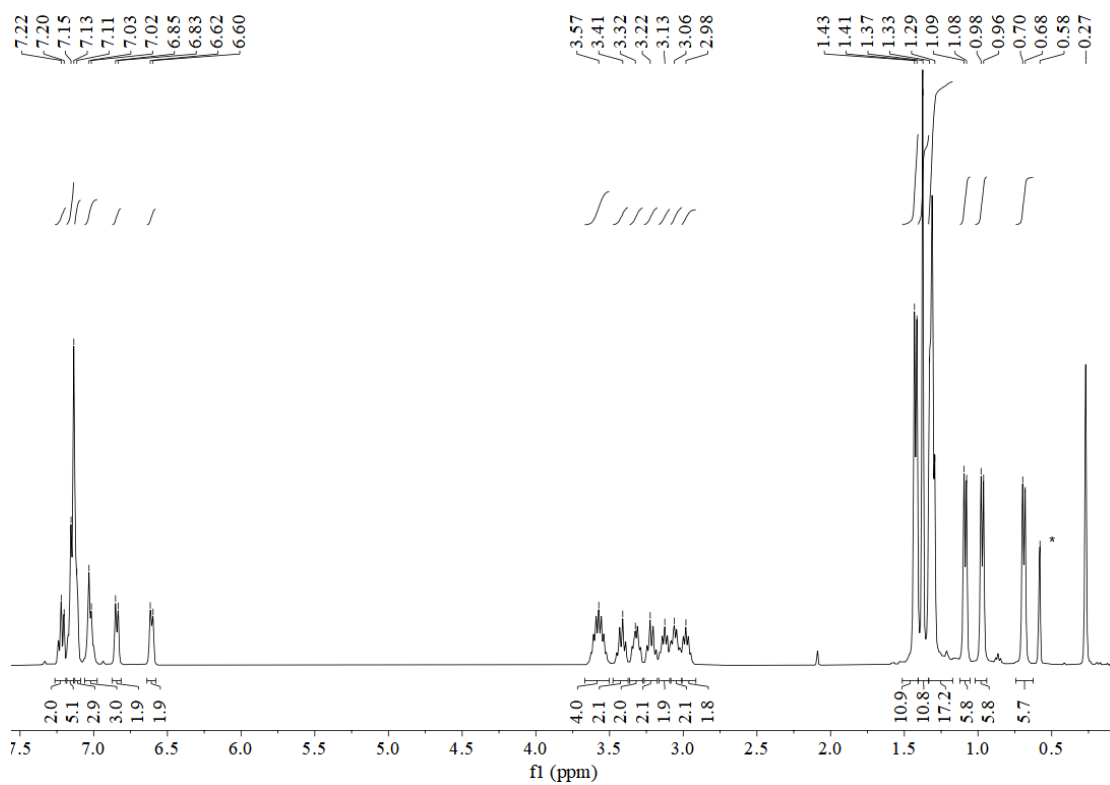

**Figure S1.**  $^1\text{H}$  NMR spectrum of **1a** in  $\text{C}_6\text{D}_6$ . \*Acetonitrile #Silicon grease.

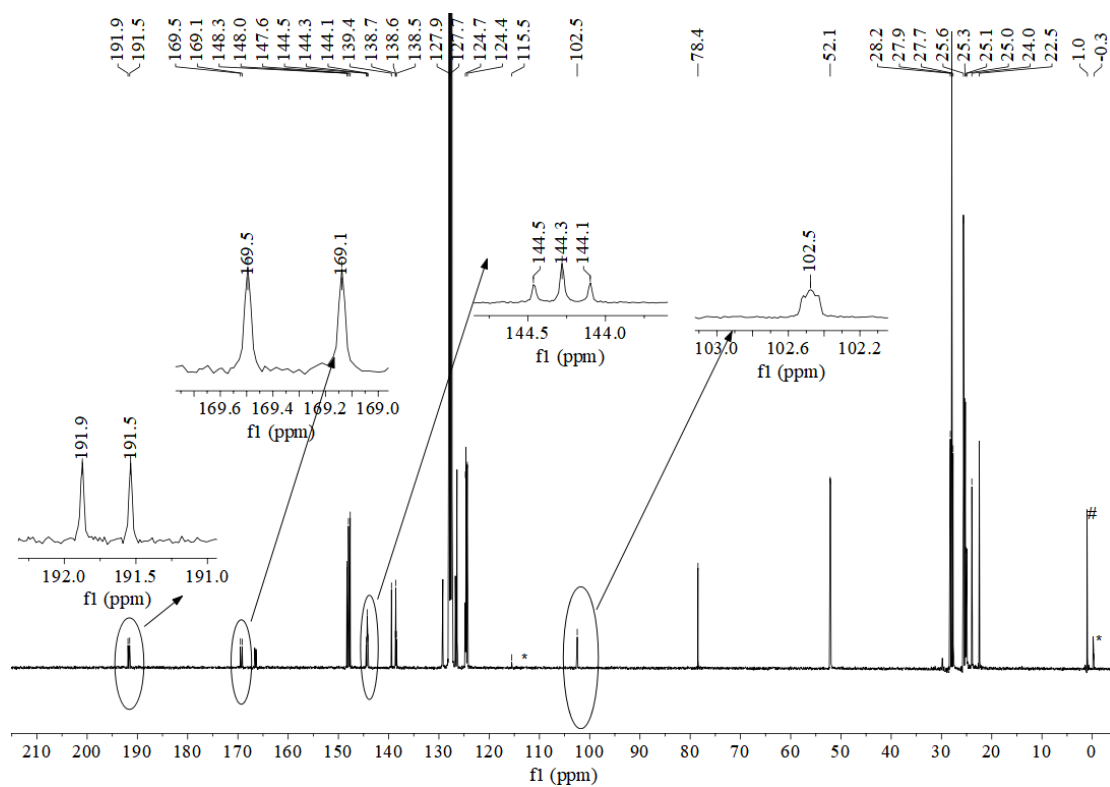

**Figure S2.**  $^{13}\text{C}\{^1\text{H}\}$  NMR spectrum of **1a** in  $\text{C}_6\text{D}_6$ . \*Acetonitrile #Silicon grease.

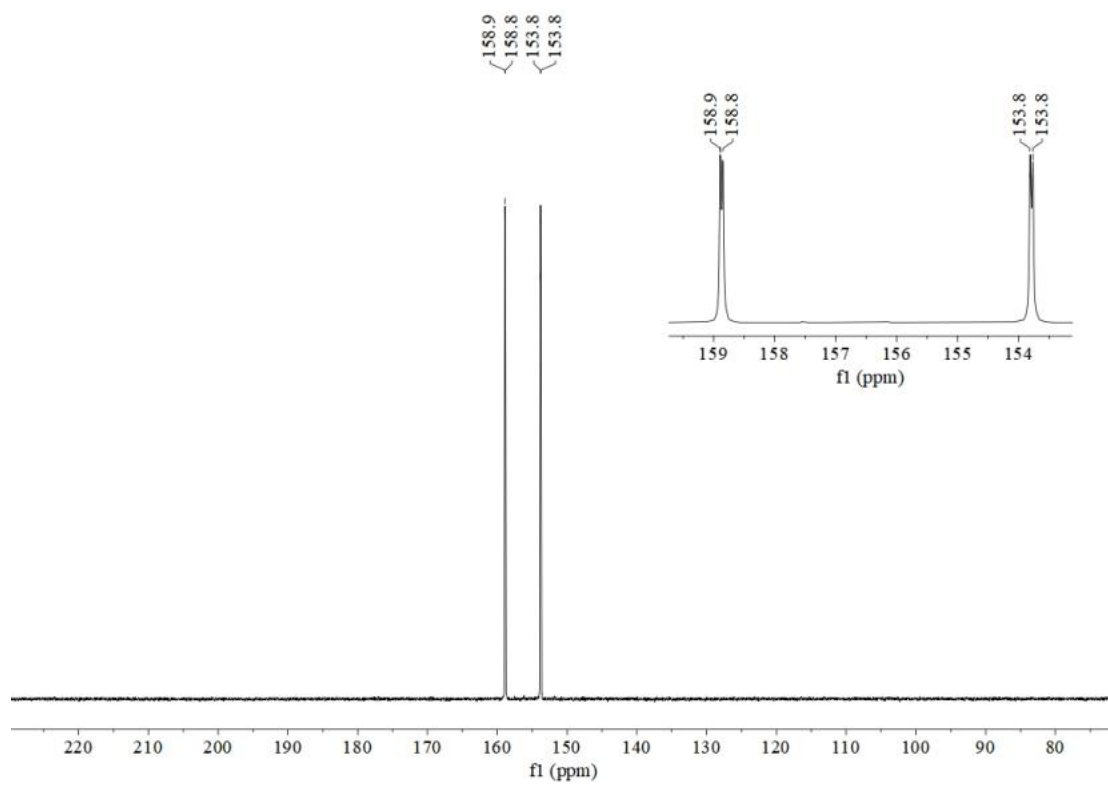

**Figure S3.**  $^{31}\text{P}\{^1\text{H}\}$  NMR spectrum of **1a** in  $\text{C}_6\text{D}_6$ .

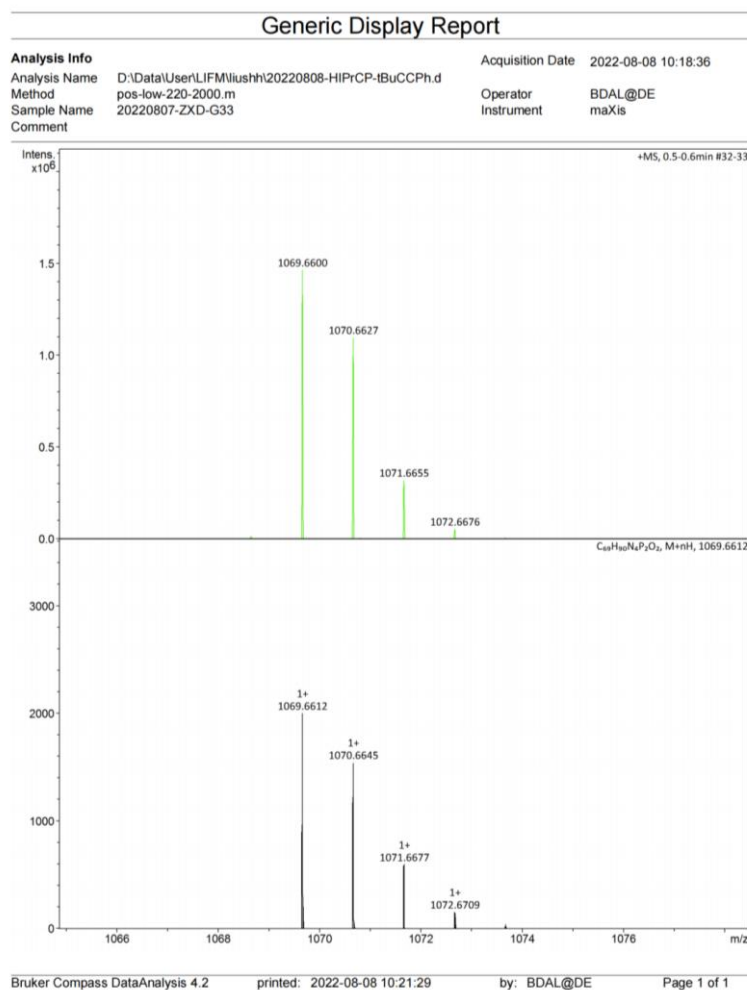

**Figure S4.** ESI-MS of **1a**.

**Preparation of  $2a^{*+}(\text{BAR}^{\text{F}})$ :**  $\text{Fc}^+(\text{BAR}^{\text{F}})$  (0.8 equivalent in diethyl ether 2 mL) was added dropwise to a stirred solution of **1a** (53.6 mg, 0.05 mmol) in diethyl ether (10 mL) at  $-30\text{ }^{\circ}\text{C}$ . After stirring for 0.5 hour, the solvent was removed under reduced pressure. Then, the remaining solid was washed with hexane and dried in vacuo to afford green powder as  $2a^{*+}(\text{BAR}^{\text{F}})$ , 67.6 mg, 0.035 mmol, 87.5% yield (based on oxidant). Green crystals of  $2a^{*+}(\text{BAR}^{\text{F}})$  were obtained from a saturated solution of mixed hexane and diethyl ether (1:1) via slow evaporation at room temperature. M. P. =  $160.6\text{ }^{\circ}\text{C}$  (Decomposition, green to dark-brown). UV/Vis (THF,  $\lambda$  (nm)  $\epsilon$  ( $\text{M}^{-1}\text{cm}^{-1}$ )): 269 (4681.5), 473 (880.4), 665 (182.3).

**Preparation of  $2b^{*+}(\text{BAR}^{\text{F}})$ :**  $\text{Fc}^+(\text{BAR}^{\text{F}})$  (0.8 equivalent in diethyl ether 2 mL) was added dropwise to a stirred solution of **1b** (51.9 mg, 0.05 mmol) in diethyl ether (10 mL) at  $-30\text{ }^{\circ}\text{C}$ . After stirring for 0.5 hour, the solvent was removed under reduced

pressure. Then, the remaining solid was washed with hexane and dried *in vacuo* to afford green powder as **2b**<sup>+</sup>(BAr<sup>F</sup>), 60.3 mg, 0.032 mmol, 80.0% yield (based on oxidant). Green crystals of **2b**<sup>+</sup>(BAr<sup>F</sup>) were obtained from a saturated solution of mixed hexane and diethyl ether (1:1) via slow evaporation at room temperature. M. P. = 167.1 °C (Decomposition, green to red-brown). UV/Vis (THF,  $\lambda$  (nm)  $\epsilon$  (M<sup>-1</sup>cm<sup>-1</sup>)): 268 (6178.5), 472 (1356.8), 657 (642.5).

**Preparation of 3:** Magnesium powder (28.8 mg, 1.2 mmol) was added to a stirred solution of **2a**<sup>+</sup>(BAr<sup>F</sup>) (192.8 mg, 0.1 mmol) in tetrahydrofuran (3 mL) at room temperature. After stirring for overnight, the solvent was removed under reduced pressure. The remaining solid was washed with acetonitrile and dried *in vacuo* to afford **3** as reddish powder, 97.5 mg, 0.091 mmol, 91.0% yield. Reddish crystals of **3** were obtained from a saturated hexane solution via slow evaporation at room temperature. M. P. = 247.7 °C. <sup>1</sup>H NMR (C<sub>6</sub>D<sub>6</sub>, 400 MHz):  $\delta$  = 7.29 (m, 2 H, C<sub>ar</sub>H), 7.15 (m, 6 H, C<sub>ar</sub>H), 6.96 (m, 5 H, C<sub>ar</sub>H), 6.85 (d,  $J$  = 4.0 Hz, 1 H, C<sub>ar</sub>H), 6.77 (d,  $J$  = 8.0 Hz, 1 H, C<sub>ar</sub>H), 5.68 (d,  $J$  = 4.0 Hz, 2 H, C<sub>ar</sub>H), 4.22 (m, 1 H, CHMe<sub>2</sub>), 3.97 (m, 1 H, CHMe<sub>2</sub>), 3.82 (m, 2 H, NCH<sub>2</sub>), 3.69 (m, 2 H, NCH<sub>2</sub>), 3.56 (m, 2 H, NCH<sub>2</sub>), 3.18 (m, 1 H, NCH<sub>2</sub>), 3.08 (m, 1 H, NCH<sub>2</sub>), 2.94 (m, 5 H, CHMe<sub>2</sub>), 2.73 (m, 1 H, CHMe<sub>2</sub>), 1.69 (d,  $J$  = 4.0 Hz, 3 H, CH<sub>3</sub>), 1.59 (d,  $J$  = 8.0 Hz, 3 H, CH<sub>3</sub>), 1.33 (m, 6 H, CH<sub>3</sub>), 1.21 (m, 27 H, CH<sub>3</sub>), 1.07 (m, 12 H, CH<sub>3</sub>), 0.99 (d,  $J$  = 4.0 Hz, 3 H, CH<sub>3</sub>), 0.81 (d,  $J$  = 8.0 Hz, 3 H, CH<sub>3</sub>); <sup>13</sup>C {<sup>1</sup>H} NMR (C<sub>6</sub>D<sub>6</sub>, 100.5 MHz):  $\delta$  = 164.3 (s, CCOO), 158.6 (d, <sup>1</sup>J<sub>PC</sub> = 30.2 Hz, PCC<sub>ar</sub>), 153.1 (t, <sup>1</sup>J<sub>PC</sub> = 40.2 Hz, PCC), 149.6 (s, C<sub>ar</sub>), 148.0 (s, C<sub>ar</sub>), 147.4 (s, C<sub>ar</sub>), 146.6 (s, C<sub>ar</sub>), 141.8 (s, C<sub>ar</sub>), 141.3 (d, <sup>1</sup>J<sub>PC</sub> = 20.1 Hz, PCC), 139.7 (s, C<sub>ar</sub>), 148.0 (s, C<sub>ar</sub>), 139.4 (s, C<sub>ar</sub>), 138.3 (s, C<sub>ar</sub>), 131.9 (d, <sup>1</sup>J<sub>PC</sub> = 11 Hz, CCCO), 131.0 (s, C<sub>ar</sub>), 127.9 (s, C<sub>ar</sub>), 127.7 (s, C<sub>ar</sub>), 127.4 (s, C<sub>ar</sub>), 126.5 (s, C<sub>ar</sub>), 125.7 (s, C<sub>ar</sub>), 125.1 (s, C<sub>ar</sub>), 125.0 (s, C<sub>ar</sub>), 124.4 (s, C<sub>ar</sub>), 123.7 (s, C<sub>ar</sub>), 94.7 (s, OCM<sub>3</sub>), 77.5 (s, PCP), 52.3 (s, NCH<sub>2</sub>), 29.9 (CH<sub>3</sub>), 28.9 (CH<sub>3</sub>), 28.7 (CH<sub>3</sub>), 28.6 (CH<sub>3</sub>), 28.4 (CH<sub>3</sub>), 27.9 (CH<sub>3</sub>), 27.3 (CH<sub>3</sub>), 27.2 (CH<sub>3</sub>), 26.4 (CH<sub>3</sub>), 26.1 (CH<sub>3</sub>), 25.5 (CH<sub>3</sub>), 25.4 (CH<sub>3</sub>), 24.8 (CH<sub>3</sub>), 24.5 (CH<sub>3</sub>), 24.1 (CH<sub>3</sub>), 23.4 (CH<sub>3</sub>), 23.0 (CH<sub>3</sub>), 22.8 (CH<sub>3</sub>), 22.7 (CH<sub>3</sub>). <sup>31</sup>P {<sup>1</sup>H} NMR (C<sub>6</sub>D<sub>6</sub>, 161.9 MHz)  $\delta$  = -154.1 (d, <sup>1</sup>J<sub>PC</sub> = 64.8 Hz), -197.1 (d, <sup>1</sup>J<sub>PC</sub> = 64.8 Hz). UV/Vis (THF,  $\lambda$  (nm)  $\epsilon$  (M<sup>-1</sup>cm<sup>-1</sup>))

<sup>1</sup>): 270 (7760.0), 324 (3658.7), 443 (1541.4); ESI-MS [M+H]<sup>+</sup> C<sub>69</sub>H<sub>90</sub>N<sub>4</sub>O<sub>2</sub>P<sub>2</sub><sup>+</sup> calc.  
1069.661 m/z, found 1069.654 [M+H]<sup>+</sup>.

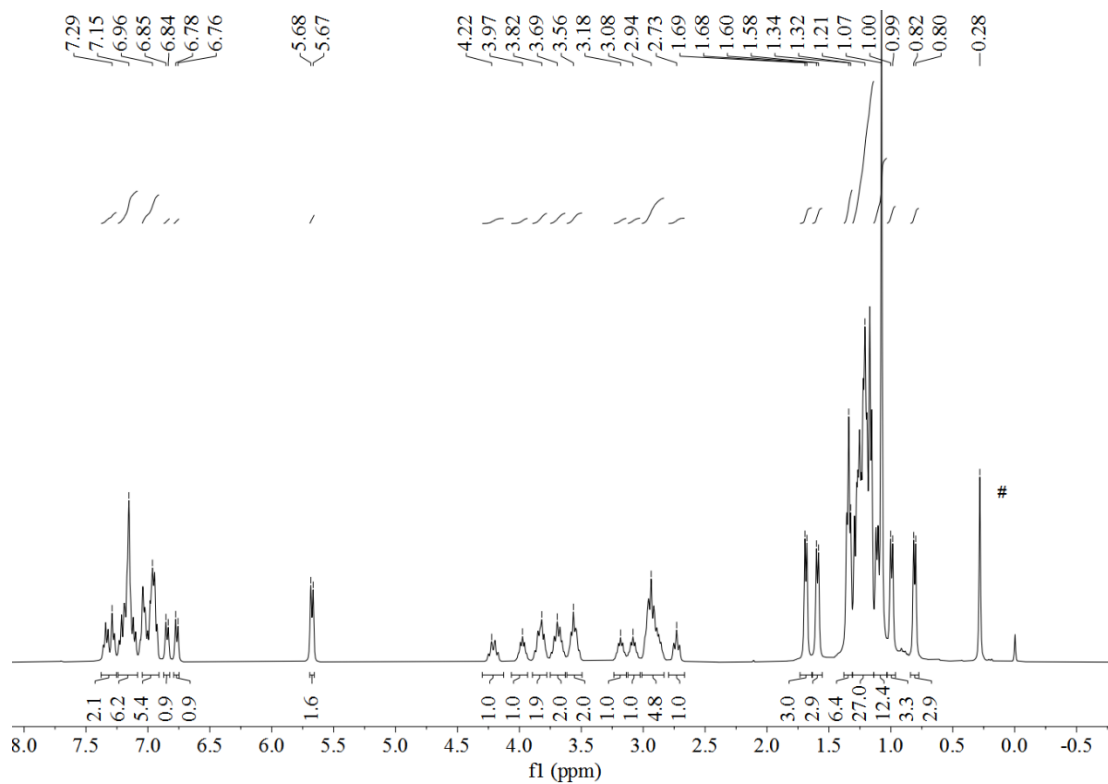

**Figure S5.** <sup>1</sup>H NMR spectrum of **3** in C<sub>6</sub>D<sub>6</sub>. #Silicon grease.

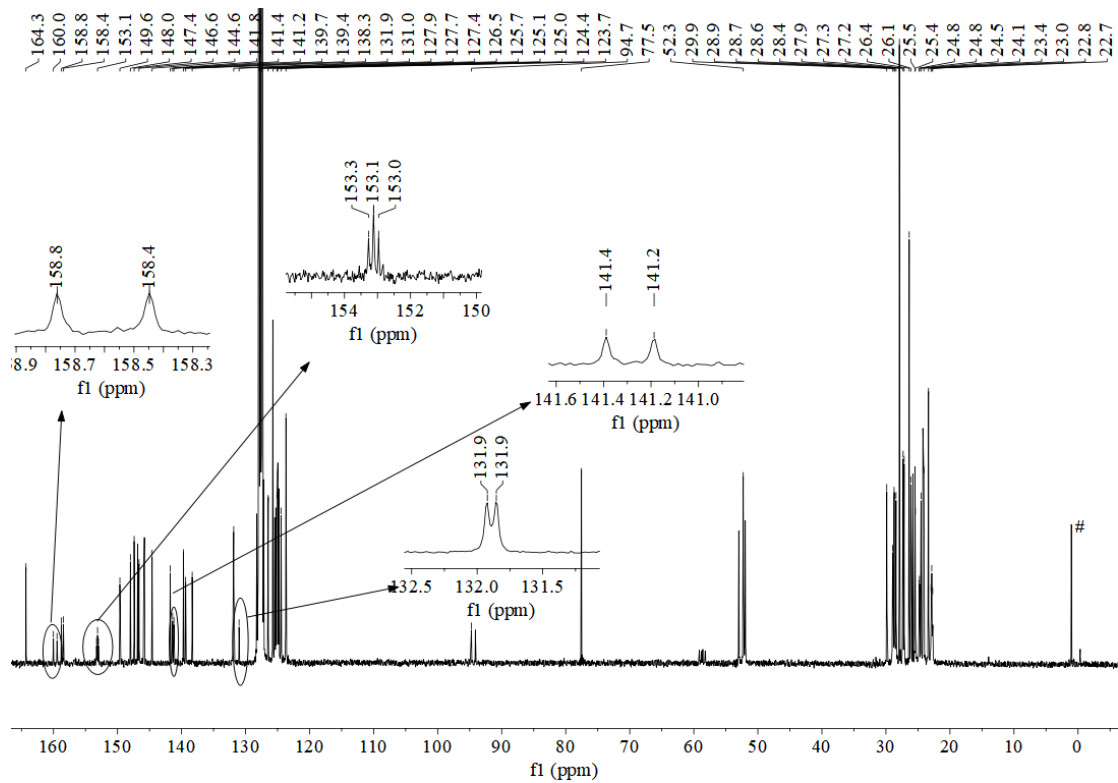

**Figure S6.**  $^{13}\text{C}\{^1\text{H}\}$  NMR spectrum of **3** in  $\text{C}_6\text{D}_6$ . #Silicon grease.

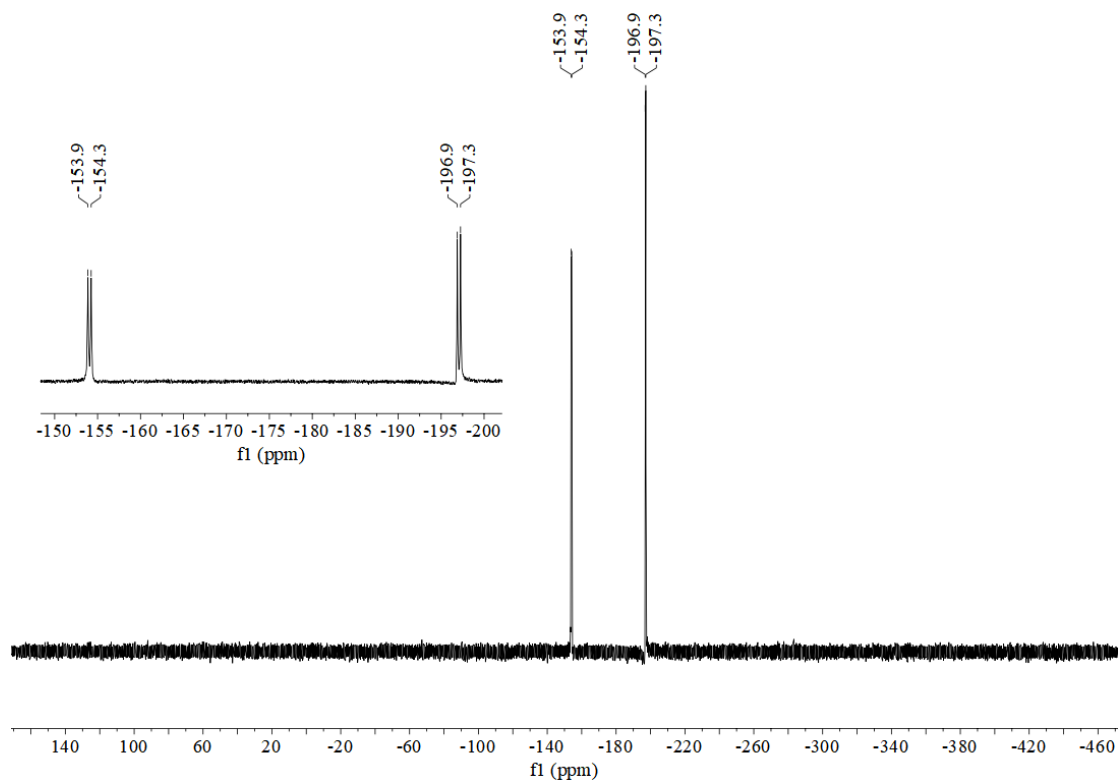

**Figure S7.**  $^{31}\text{P}\{^1\text{H}\}$  NMR spectrum of **3** in  $\text{C}_6\text{D}_6$ .



## Generic Display Report

|                      |                                                              |                  |                     |
|----------------------|--------------------------------------------------------------|------------------|---------------------|
| <b>Analysis Info</b> | D:\Data\User\LIFM\liushh\20220808-HIPrCP-tBuCCPh-barf-Mg-4.d | Acquisition Date | 2022-08-08 11:09:31 |
| Method               | pos-low-220-2000.m                                           | Operator         | BDAL@DE             |
| Sample Name          | 20220807-ZXD-G33                                             | Instrument       | maXis               |
| Comment              |                                                              |                  |                     |

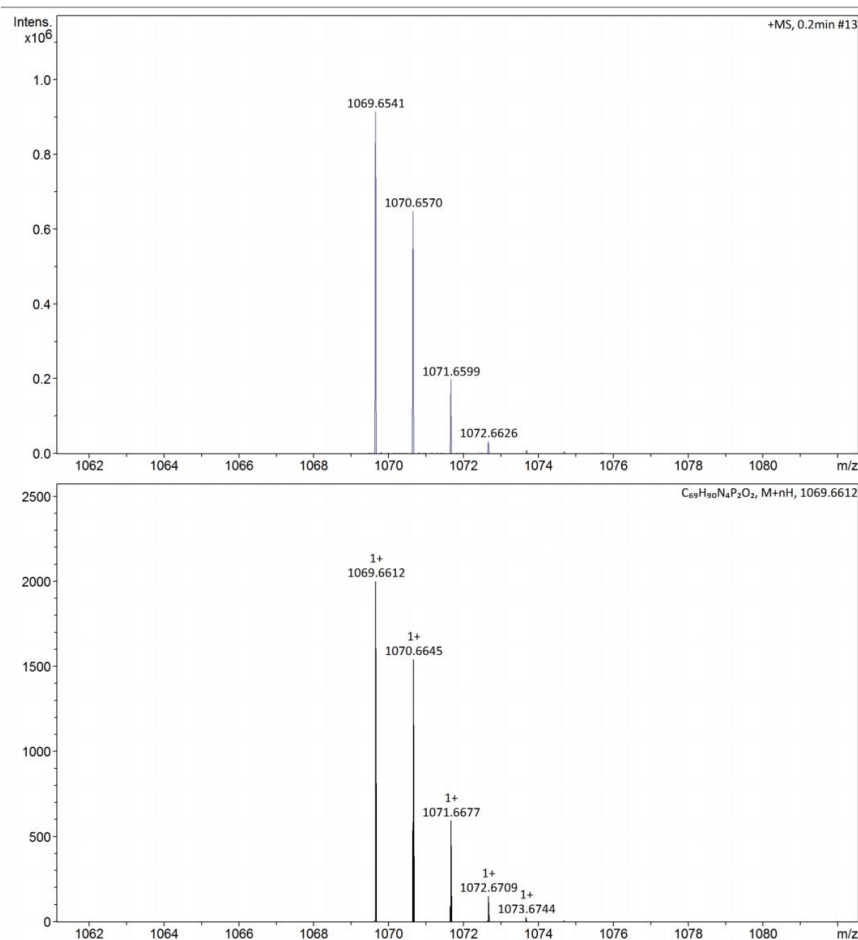

Bruker Compass DataAnalysis 4.2    printed: 2022-08-08 11:37:06    by: BDAL@DE    Page 1 of 1

**Figure S8.** ESI-MS of **3**.

**Preparation of 4<sup>+</sup>(BAr<sup>F</sup>):** Diphenyl disulfide (0.5 equivalent) was added to a stirred solution of **2a<sup>+</sup>**(BAr<sup>F</sup>) (192.8 mg, 0.1 mmol) in diethyl ether (5 mL) at room temperature. After stirring for overnight, the solvent was removed under reduced pressure. The remaining solid was washed with hexane and dried *in vacuo* to afford **4<sup>+</sup>**(BAr<sup>F</sup>) as red powder. 183.3 mg, 0.09 mmol, 90.0% yield. Red crystals of **4<sup>+</sup>**(BAr<sup>F</sup>) were obtained from a saturated acetonitrile and diethyl ether solution via slow evaporation at room temperature. M. P. = 204.3 °C. <sup>1</sup>H NMR (CD<sub>2</sub>Cl<sub>2</sub>, 400 MHz): δ = 7.76 (s, 8 H, C<sub>ar</sub>H), 7.60 (s, 4 H, C<sub>ar</sub>H), 7.49 (m, 2 H, C<sub>ar</sub>H), 7.38 (d, *J* = 8.0 Hz, 2 H, C<sub>ar</sub>H), 7.26 (m, 6 H, C<sub>ar</sub>H), 7.07 (m, 10 H, C<sub>ar</sub>H), 6.78 (s, 2 H, C<sub>ar</sub>H), 4.66 (m, 1 H, CHMe<sub>2</sub>), 4.07 (m, 5 H, CHMe<sub>2</sub>), 3.80 (m, 2 H, CHMe<sub>2</sub>), 3.43 (m, 2 H, NCH<sub>2</sub>), 3.05 (m,

6 H, NCH<sub>2</sub>), 1.45-0.71 (57 H, CH<sub>3</sub>); <sup>13</sup>C{<sup>1</sup>H} NMR (CD<sub>2</sub>Cl<sub>2</sub>, 100.5 MHz): δ = 162.3 (dd, <sup>2</sup>J<sub>PC</sub> = 50.3 Hz, PCCO), 161.3 (dd, <sup>2</sup>J<sub>PC</sub> = 50.3 Hz, PCC<sub>ar</sub>), 147.8 (s, C<sub>ar</sub>), 146.6 (s, C<sub>ar</sub>), 143.5 (d, <sup>1</sup>J<sub>PC</sub> = 60.3 Hz, PCCO), 134.8 (s, C<sub>ar</sub>), 130.8 (s, C<sub>ar</sub>), 130.2 (s, C<sub>ar</sub>), 129.0 (s, C<sub>ar</sub>), 128.0 (s, C<sub>ar</sub>), 126.5 (s, C<sub>ar</sub>), 125.8 (s, C<sub>ar</sub>), 123.2 (s, C<sub>ar</sub>), 120.5 (s, C<sub>ar</sub>), 117.4 (s, C<sub>ar</sub>), 116.5 (s, C<sub>ar</sub>), 83.1 (s, OCM<sub>e3</sub>), 30.2 (CH<sub>3</sub>), 29.7 (CH<sub>3</sub>), 29.2 (CH<sub>3</sub>), 28.9 (CH<sub>3</sub>), 28.3 (CH<sub>3</sub>), 27.5 (CH<sub>3</sub>), 27.2 (CH<sub>3</sub>), 26.7 (CH<sub>3</sub>), 26.0 (CH<sub>3</sub>), 25.3 (CH<sub>3</sub>), 25.0 (CH<sub>3</sub>), 24.9 (CH<sub>3</sub>), 24.1 (CH<sub>3</sub>), 23.7 (CH<sub>3</sub>), 23.2 (CH<sub>3</sub>). <sup>31</sup>P{<sup>1</sup>H} NMR (CD<sub>2</sub>Cl<sub>2</sub>, 161.9 MHz) δ = 310.0 (s), 6.1 (s). UV/Vis (THF, λ (nm) ε (M<sup>-1</sup>cm<sup>-1</sup>)): 263 (7793.4), 393 (2261.5), 501 (1890.6); ESI-MS [M]<sup>+</sup> C<sub>75</sub>H<sub>95</sub>N<sub>4</sub>O<sub>2</sub>P<sub>2</sub>S<sup>+</sup> calc. 1177.665 m/z, found 1177.658 [M]<sup>+</sup>.

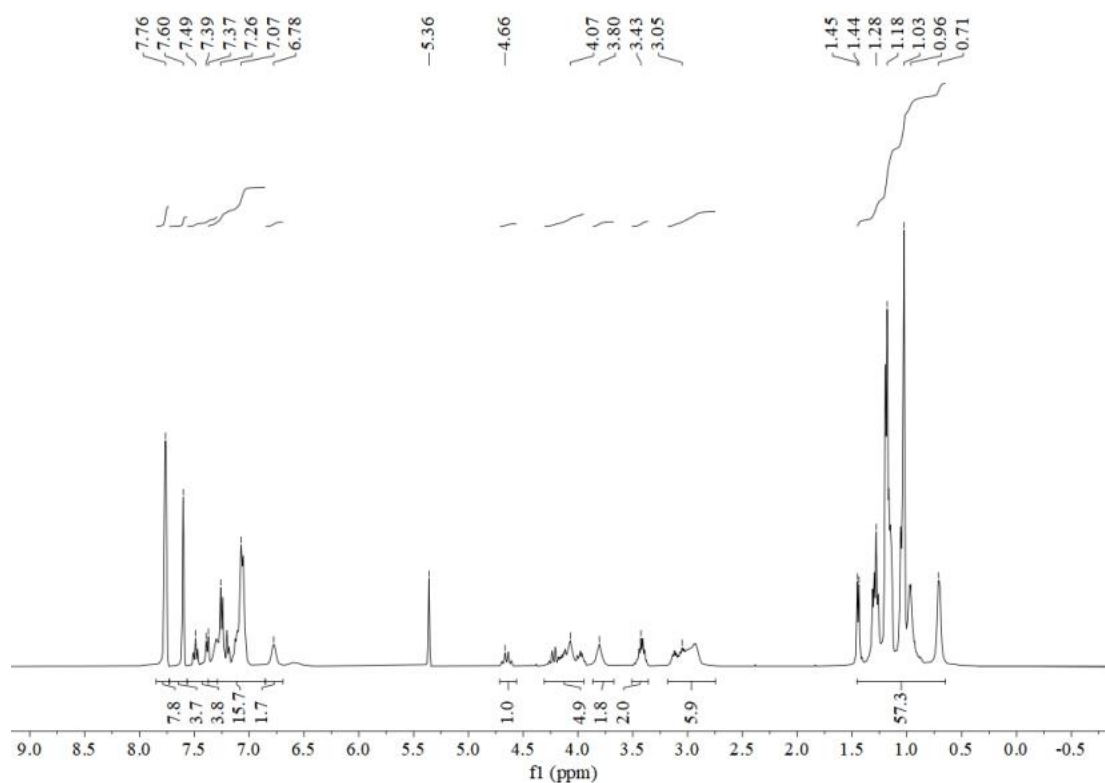

**Figure S9.** <sup>1</sup>H NMR spectrum of 4<sup>+</sup>(BARF) in CD<sub>2</sub>Cl<sub>2</sub>.

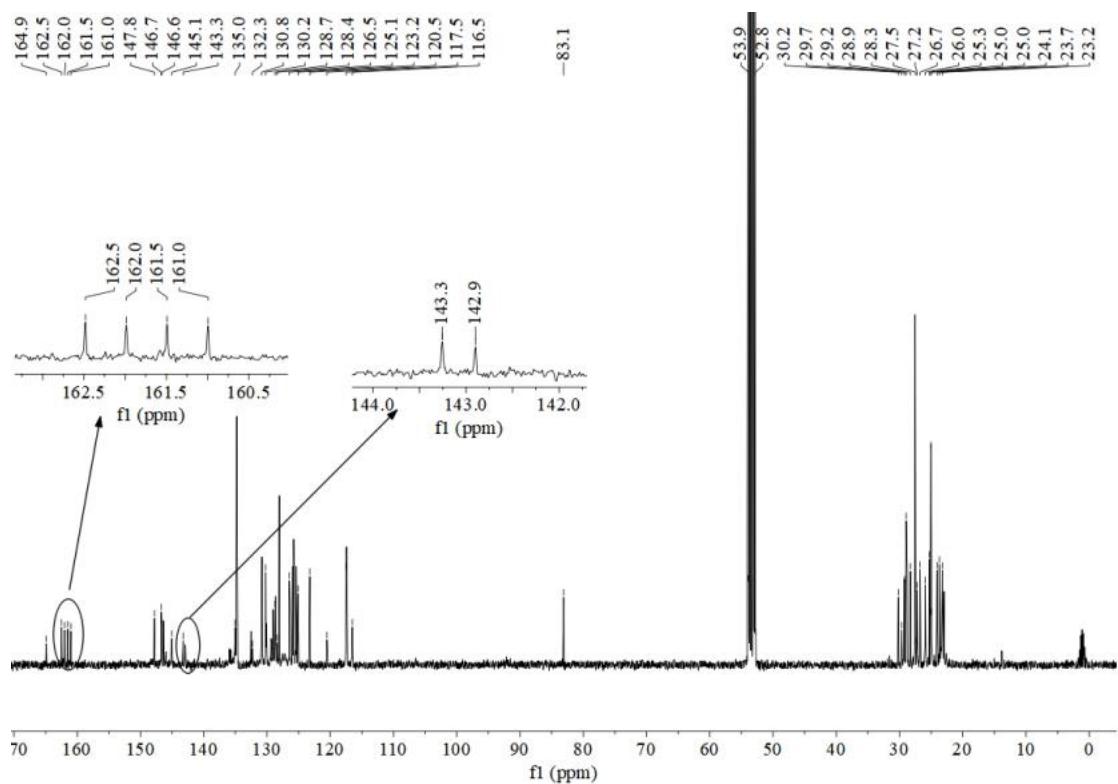

Figure S10.  $^{13}\text{C}\{^1\text{H}\}$  NMR spectrum of  $4^+(\text{BAr}^{\text{F}})$  in  $\text{CD}_2\text{Cl}_2$ .

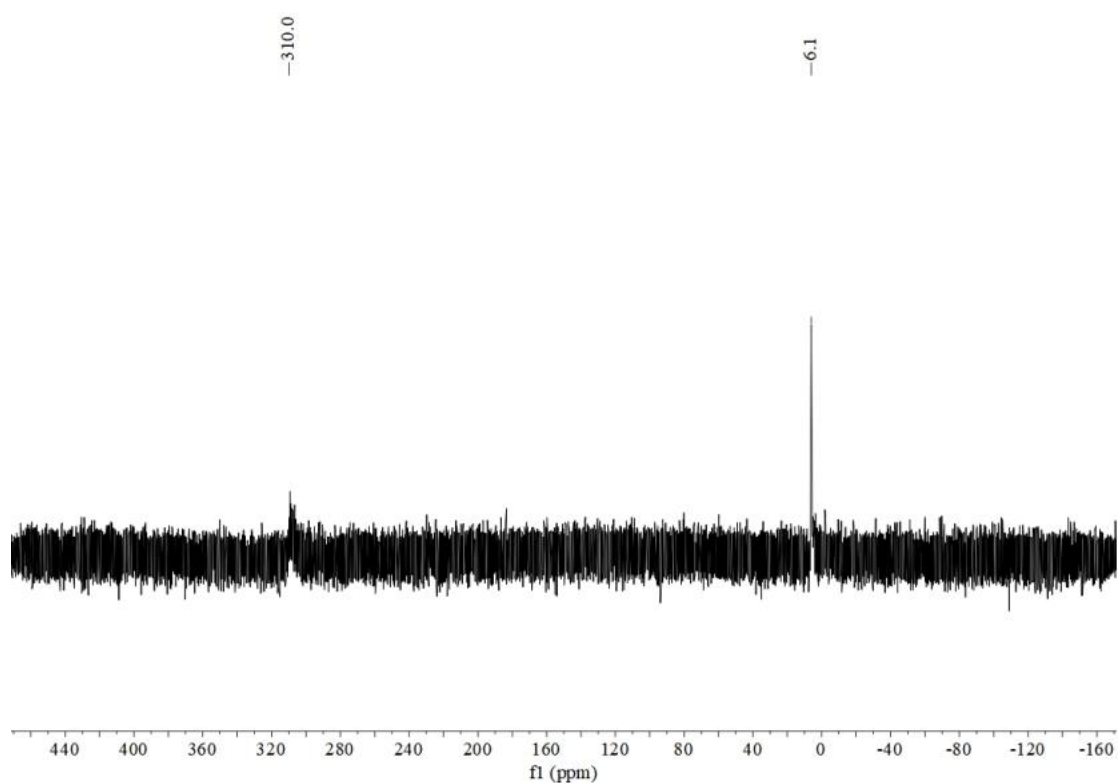

Figure S11.  $^{31}\text{P}\{^1\text{H}\}$  NMR spectrum of  $4^+(\text{BAr}^{\text{F}})$  in  $\text{CD}_2\text{Cl}_2$ .

## Generic Display Report

|                      |                                                                |                  |
|----------------------|----------------------------------------------------------------|------------------|
| <b>Analysis Info</b> | Acquisition Date 2022-08-08 20:50:39                           |                  |
| Analysis Name        | D:\Data\User\LIFM\luis\20220808-HIPrCP-tBuCCPh-BARF-Mg-PhS-2.d |                  |
| Method               | pos-low-220-2000.m                                             | Operator BDAL@DE |
| Sample Name          | WASH-MeOH                                                      | Instrument maXis |
| Comment              |                                                                |                  |

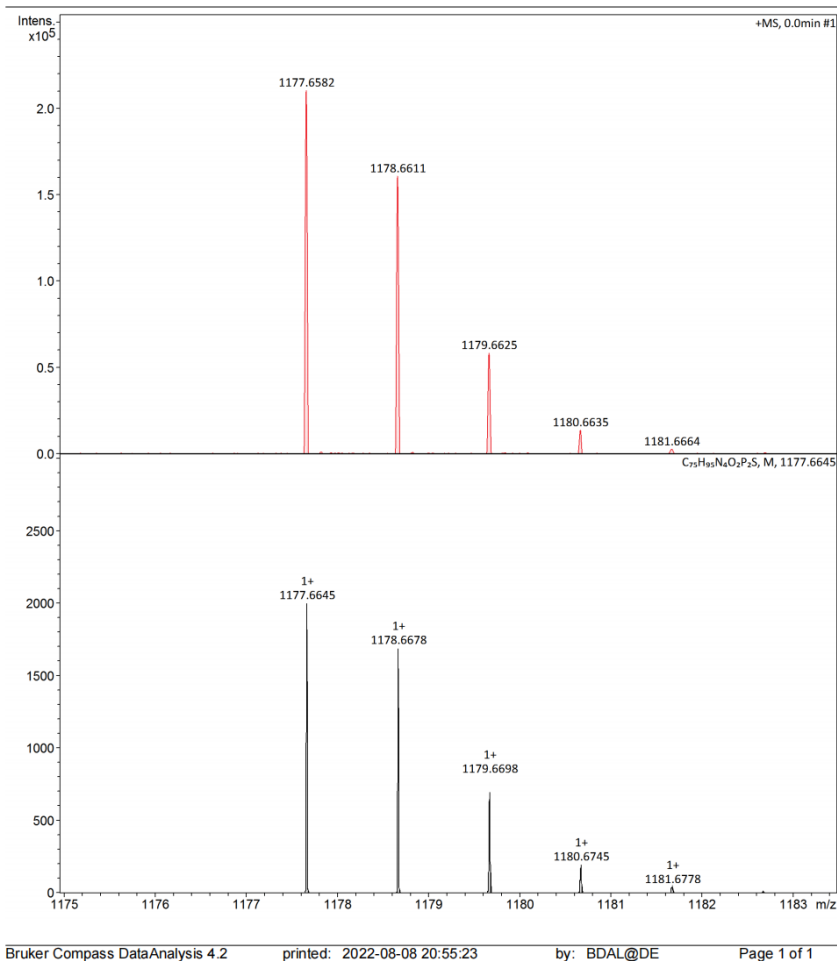

**Figure S12.** ESI-MS of  $4^+(\text{BARF})$ .

**Preparation of 5:** Potassium fluoride (3.0 equivalent) and 18-crown-6 (1.0 equivalent) was added to a stirred solution of  $4^+(\text{BARF})$  (117.8 mg, 0.1 mmol) in tetrahydrofuran (10 mL) at room temperature. After stirring for one week, the solvent was removed under reduced pressure. The remaining solid was extracted with hexane, then washed with acetonitrile and dried in vacuo to afford **5** as yellow powder, 87.3 mg, 0.073 mmol, 73.0% yield. Yellow crystals of **5** were obtained from a saturated hexane solution via slow evaporation at room temperature. M. P. = 232.1 °C (Decomposition). The detailed  $^1\text{H}$  and  $^{13}\text{C}$  NMR data were not available because the presence of two isomers.  $^{31}\text{P}\{^1\text{H}\}$  NMR ( $\text{C}_6\text{D}_6$ , 161.9 MHz)  $\delta$  = 149.7 (d,  $^2J_{\text{PF}}$  = 921.2 Hz, PF), 13.5 (s,  $\text{PSC}_{\text{ar}}$ );  $^{19}\text{F}$  NMR ( $\text{C}_6\text{D}_6$ , 376.6 MHz)  $\delta$  = -124.2 (d,  $^2J$  = 919.3 Hz, PF, 77%), -127.6 (d,  $^2J$  = 926.4 Hz,

PF, 23%); UV/Vis (THF,  $\lambda$  (nm)  $\epsilon$  ( $M^{-1}cm^{-1}$ )): 331 (1235.8), 416 (780.2); ESI-MS  $[M]^+$   
 $C_{75}H_{95}FN_4O_2P_2S^+$  calc. 1196.663 m/z, found 1196.664  $[M]^+$ .

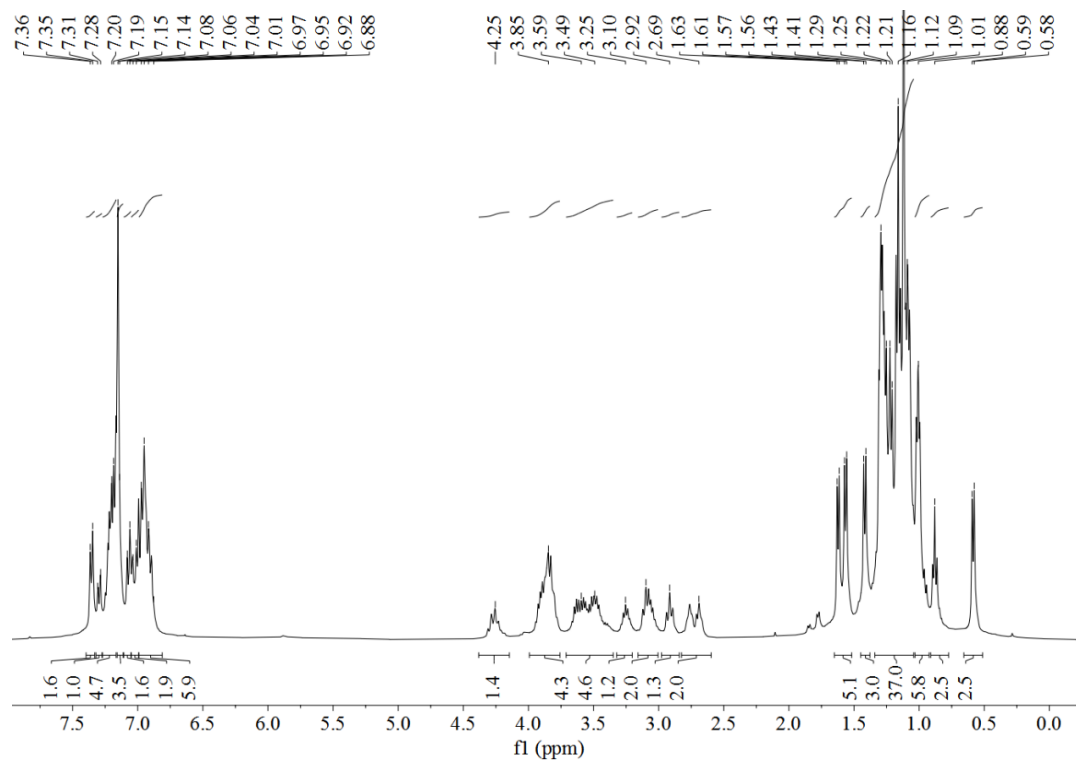

Figure S13.  $^1H$  NMR spectrum of **5** in  $C_6D_6$ .

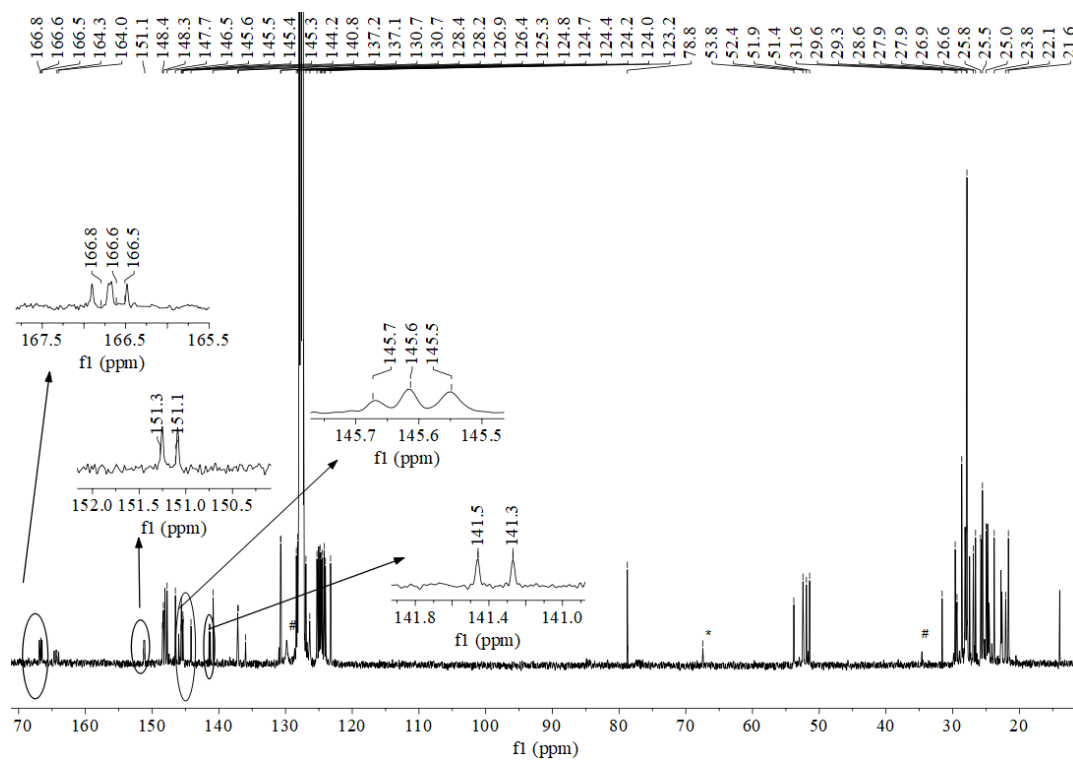

Figure S14.  $^{13}C\{^1H\}$  NMR spectrum of **5** in  $C_6D_6$ .

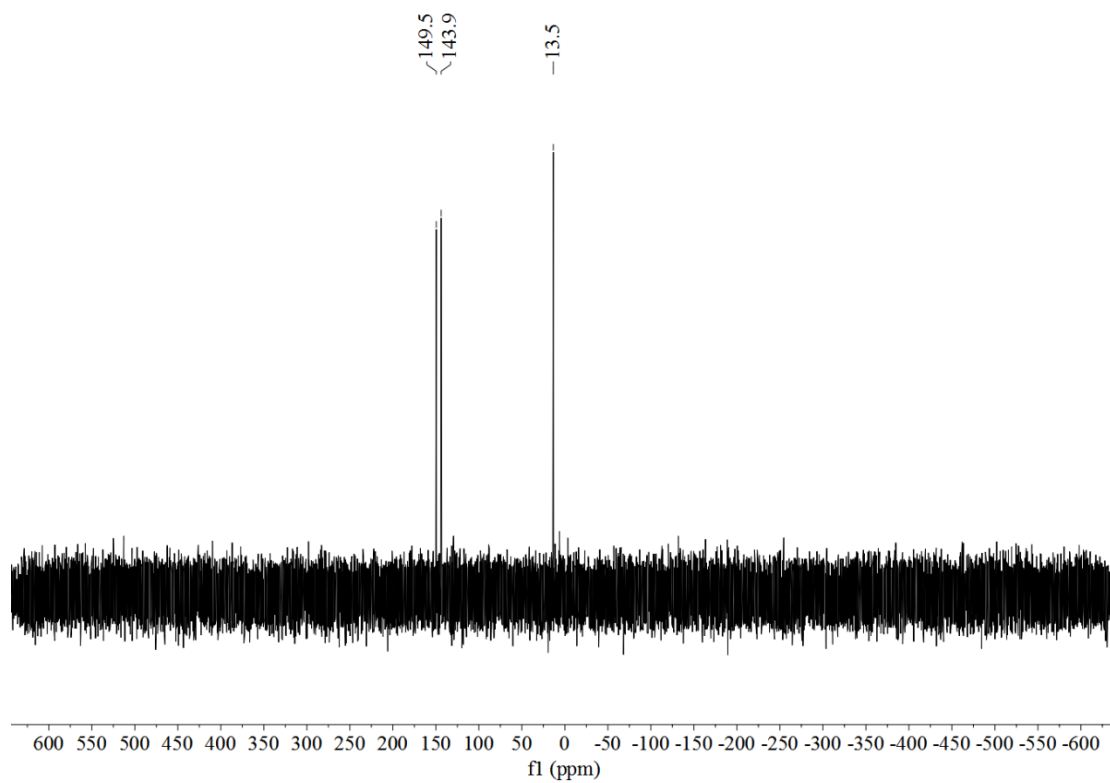

**Figure S15.** <sup>31</sup>P{<sup>1</sup>H} NMR spectrum of **5** in C<sub>6</sub>D<sub>6</sub>.

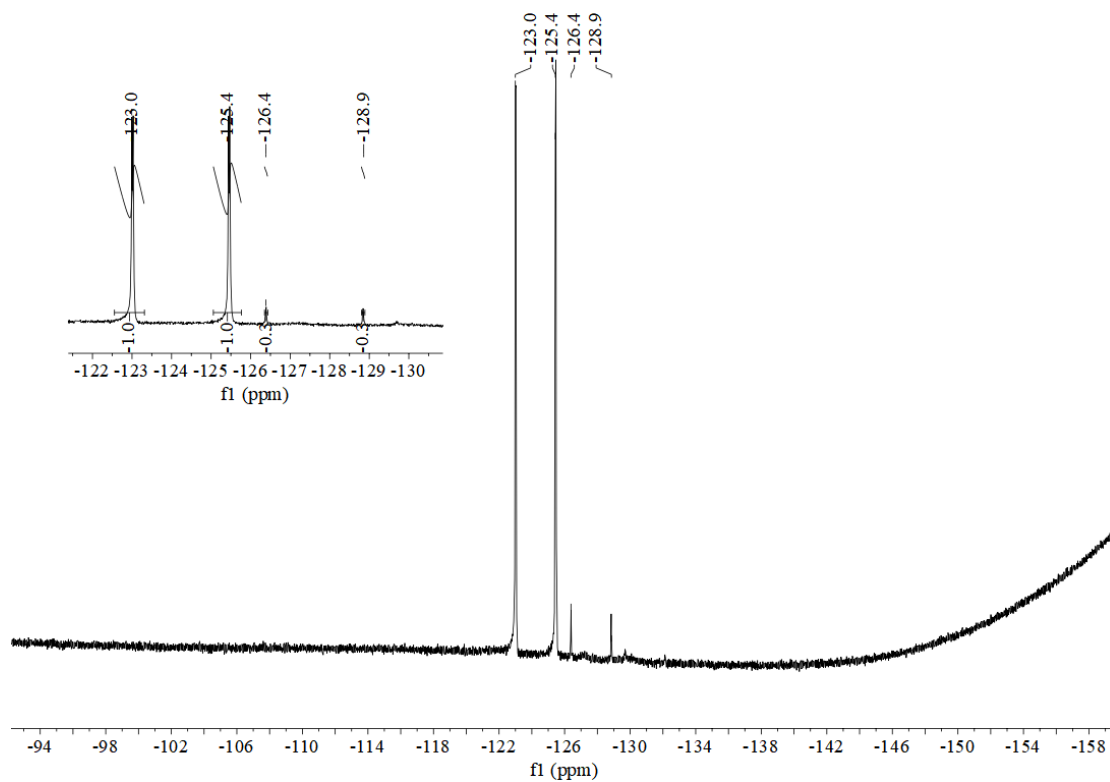

**Figure S16.** <sup>19</sup>F{<sup>1</sup>H} NMR spectrum of **5** in C<sub>6</sub>D<sub>6</sub>.

## Generic Display Report

|                                                                                  |                                      |  |
|----------------------------------------------------------------------------------|--------------------------------------|--|
| <b>Analysis Info</b>                                                             | Acquisition Date 2022-08-10 19:51:28 |  |
| Analysis Name D:\Data\User\LIFM\lilushh\20220810-HIPrCP-IBuCCPh-BARF-Mg-PhS-FK.d | Operator BDAL@DE                     |  |
| Method 3Seg-4000V-220DU-(400-2600)-POS-LOW.m                                     | Instrument maXis                     |  |
| Sample Name 20220809-YYH-edc                                                     |                                      |  |
| Comment                                                                          |                                      |  |

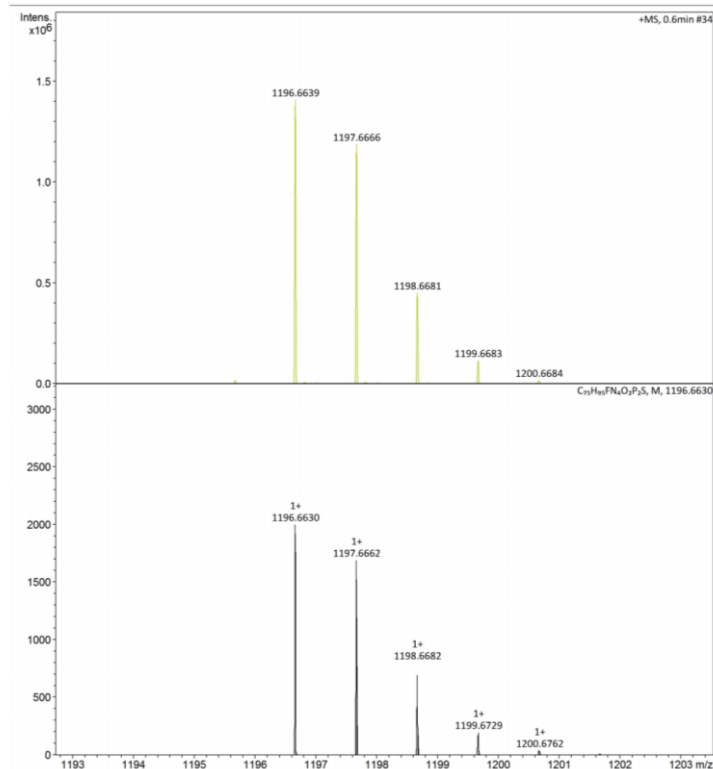

Bruker Compass DataAnalysis 4.2 printed: 2022-08-10 19:59:14 by: BDAL@DE Page 1 of 1

**Figure S17.** ESI-MS of **5**.

**Preparation of  $6^+(\text{BAR}^{\text{F}})$ :** Sodium azide powder (130 mg, 2 mmol) was added to a stirred solution of  $2\mathbf{a}^{++}(\text{BAR}^{\text{F}})$  (192.8 mg, 0.1 mmol) in tetrahydrofuran (5 mL) at room temperature. After stirring overnight, the resulting suspension was filtered and the filtrate was dried under reduced pressure. The remaining solid was extracted with the mixture of hexane and toluene (1:1), then filtered through celite and the resulting filtrate was dried under reduced pressure. Then, the remaining residue was washed with hexane and dried in vacuo to afford  $6^+(\text{BAR}^{\text{F}})$  as reddish powder, 143.6 mg. The powder was further purified via slow evaporation from a saturated hexane and tetrahydrofuran (1:1) solution at room temperature yielding crystalline reddish materials of  $6^+(\text{BAR}^{\text{F}})$ , 30 mg, 14.6% yield. M. P. = 238.2 °C.  $^1\text{H}$  NMR ( $\text{CD}_3\text{CN}$ , 400 MHz):  $\delta$  = 7.71 (m, 7H,  $\text{C}_{\text{ar}}\text{H}$ ), 7.69 (m, 4 H,  $\text{C}_{\text{ar}}\text{H}$ ), 7.52 (m, 1 H,  $\text{C}_{\text{ar}}\text{H}$ ), 7.44 (m, 4 H,  $\text{C}_{\text{ar}}\text{H}$ ), 7.27 (m, 3 H,  $\text{C}_{\text{ar}}\text{H}$ ), 7.17 (m, 6 H,  $\text{C}_{\text{ar}}\text{H}$ ), 7.07 (m, 1 H,  $\text{C}_{\text{ar}}\text{H}$ ), 6.99 (m, 1 H,  $\text{C}_{\text{ar}}\text{H}$ ), 4.71 (m, 1 H,  $\text{CHMe}_2$ ), 4.31 (m, 3 H,  $\text{CHMe}_2$ ), 4.07 (m, 2 H,  $\text{NCH}_2$ ), 3.78(m, 1 H,  $\text{NCH}_2$ ), 3.67 (m, 4 H,  $\text{CHMe}_2$ ),

3.48 (m, 1 H, NCH<sub>2</sub>), 3.22 (m, 2 H, NCH<sub>2</sub>), 3.06 (m, 1 H, NCH<sub>2</sub>), 2.93 (m, 1 H, NCH<sub>2</sub>), 1.85 (m, 4 H, CH<sub>3</sub>), 1.51 (d, *J* = 8.0 Hz, 3 H, CH<sub>3</sub>), 1.44 (d, *J* = 8.0 Hz, 3 H, CH<sub>3</sub>), 1.38 (d, *J* = 8.0 Hz, 1H, CH<sub>3</sub>), 1.30 (m, 5 H, CH<sub>3</sub>), 1.20 (m, 11 H, CH<sub>3</sub>), 1.13 (m, 4 H, CH<sub>3</sub>), 1.09 (m, 10 H, CH<sub>3</sub>), 1.01 (m, 9 H, CH<sub>3</sub>), 0.95 (m, 3 H, CH<sub>3</sub>), 0.86 (d, *J* = 4.0 Hz, 2 H, CH<sub>3</sub>), 0.79 (d, *J* = 8.0 Hz, 2 H, CH<sub>3</sub>); <sup>13</sup>C{<sup>1</sup>H} NMR (CD<sub>3</sub>CN, 100.5 MHz): δ = 162.2 (d, <sup>2</sup>*J*<sub>PC</sub> = 50.3 Hz, PCCO), 161.2 (d, <sup>2</sup>*J*<sub>PC</sub> = 50.3 Hz, PCCO), 144.3 (d, <sup>2</sup>*J*<sub>PC</sub> = 40.0 Hz, PCC), 134.6 (s, C<sub>ar</sub>), 130.6 (s, C<sub>ar</sub>), 128.9 (s, C<sub>ar</sub>), 128.2 (s, C<sub>ar</sub>), 125.1 (s, C<sub>ar</sub>), 123.1 (s, C<sub>ar</sub>), 67.3 (s, OCH<sub>2</sub>CH<sub>3</sub>), 53.5 (s, NCH<sub>2</sub>), 52.4 (s, NCH<sub>2</sub>), 30.1 (CH<sub>3</sub>), 29.8 (CH<sub>3</sub>), 29.4 (CH<sub>3</sub>), 27.9 (CH<sub>3</sub>), 27.2 (CH<sub>3</sub>), 25.7 (CH<sub>3</sub>), 25.0 (CH<sub>3</sub>), 24.2 (CH<sub>3</sub>); <sup>31</sup>P{<sup>1</sup>H} NMR (CD<sub>3</sub>CN, 161.9 MHz) δ = 305.7 (s), 42.7 (s); UV/Vis (THF, λ (nm) ε (M<sup>-1</sup>cm<sup>-1</sup>)): 317.5 (4636.1), 389 (2226.6), 479 (3067.6); ESI-MS [M]<sup>+</sup> C<sub>69</sub>H<sub>90</sub>N<sub>7</sub>O<sub>2</sub>P<sub>2</sub><sup>+</sup> calc. 1110.663 m/z, found 1110.639 [M]<sup>+</sup>.

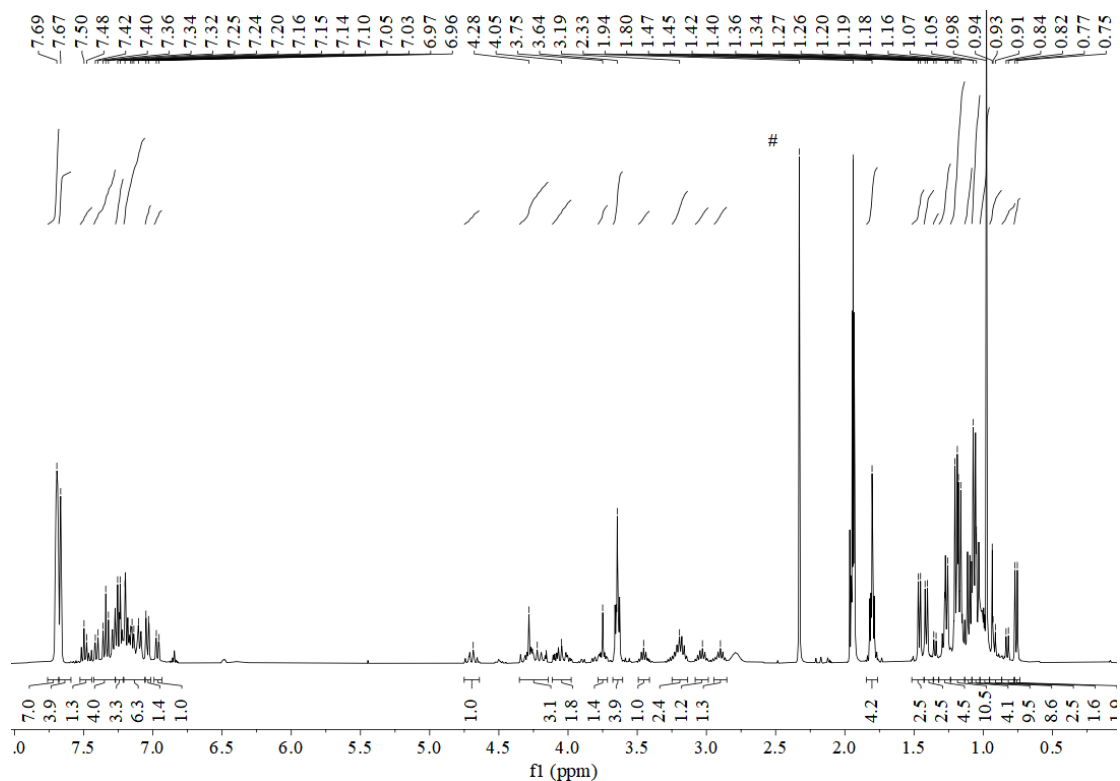

**Figure S18.** <sup>1</sup>H NMR spectrum of **6**<sup>+</sup>(BAr<sup>F</sup>) in CD<sub>3</sub>CN. #Toluene



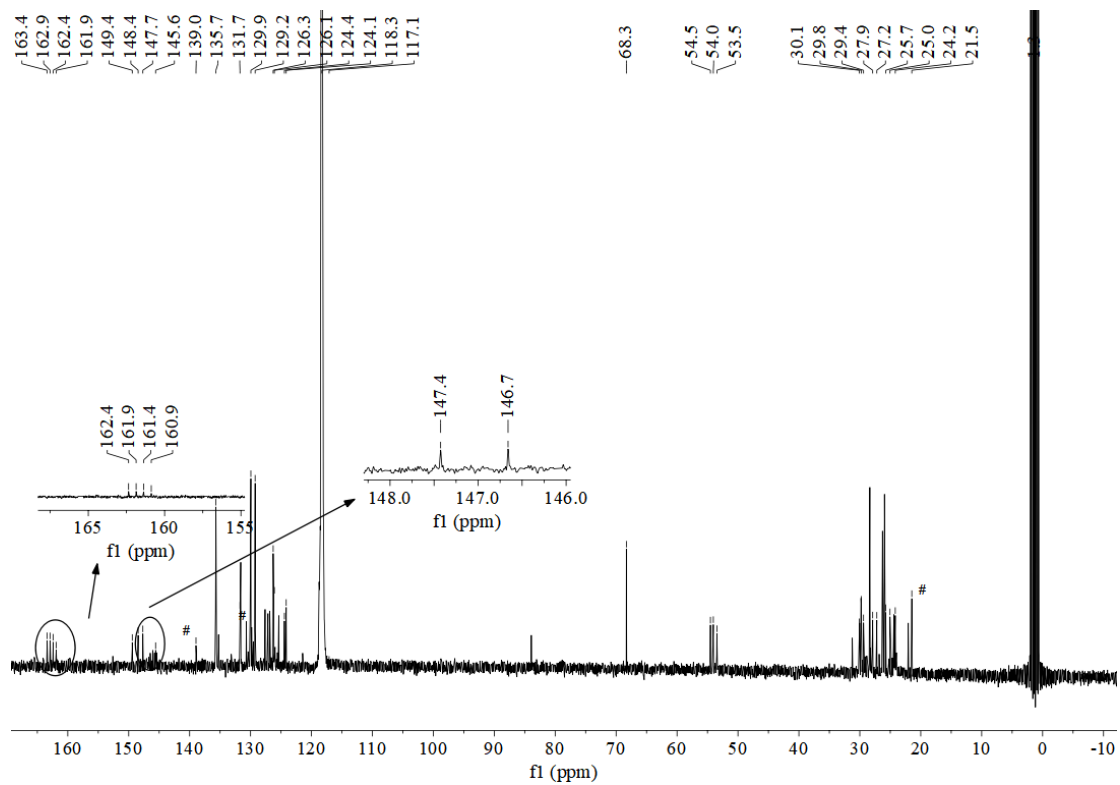

**Figure S19.**  $^{13}\text{C}\{^1\text{H}\}$  NMR spectrum of  $6^+(\text{BAr}^{\text{F}})$  in  $\text{CD}_3\text{CN}$ . #Toluene

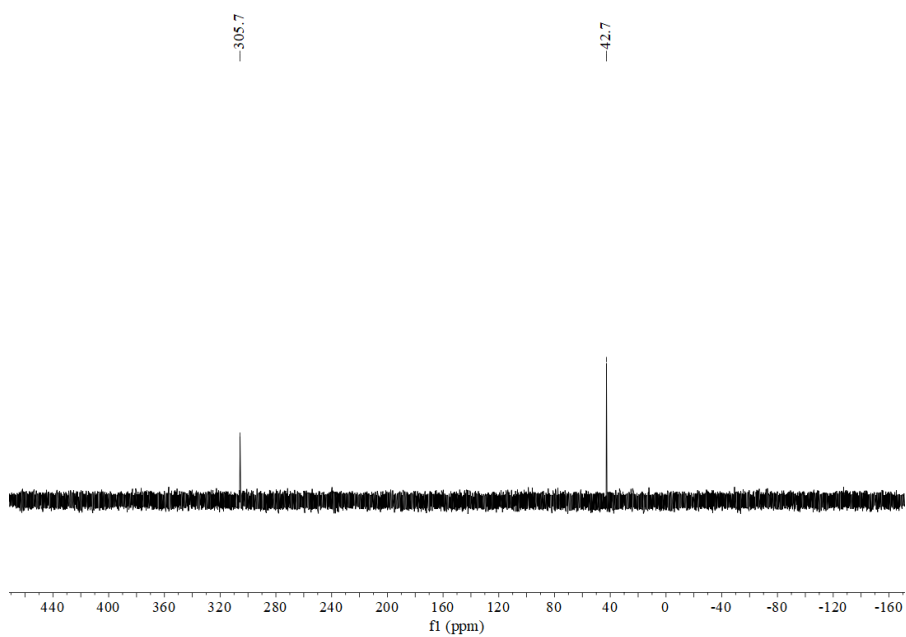

**Figure S20.**  $^{31}\text{P}\{^1\text{H}\}$  NMR spectrum of  $6^+(\text{BAr}^{\text{F}})$  in  $\text{CD}_3\text{CN}$ .

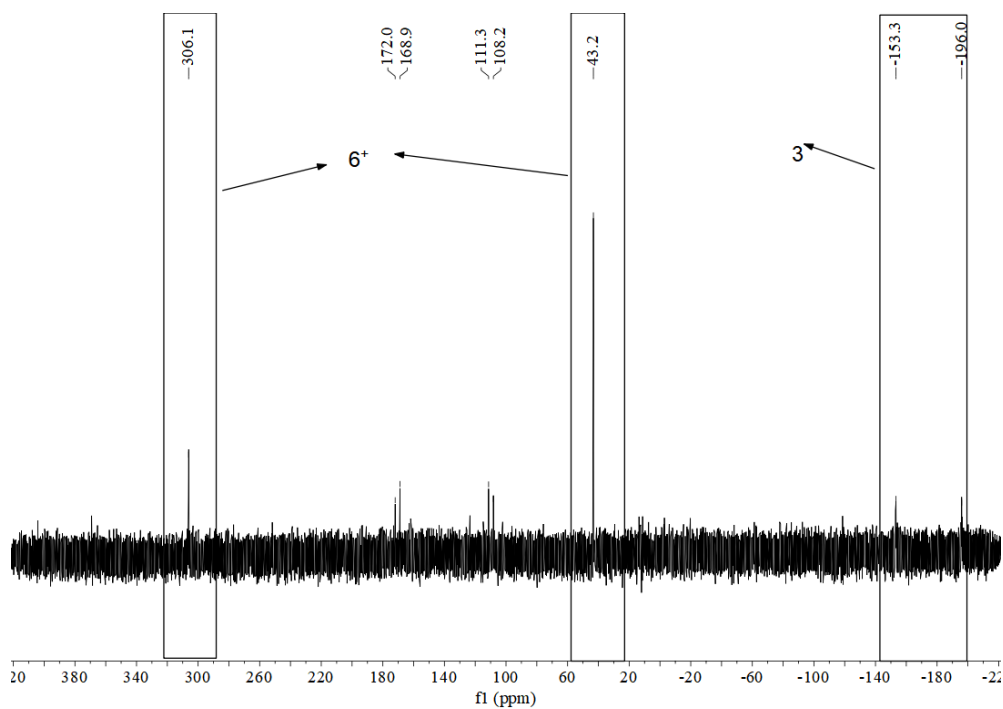

**Figure S21.**  $^{31}\text{P}\{^1\text{H}\}$  NMR spectrum of the mixture of Sodium azide powder and  $2\mathbf{a}^+(\text{BAr}^{\text{F}})$  in tetrahydrofuran.

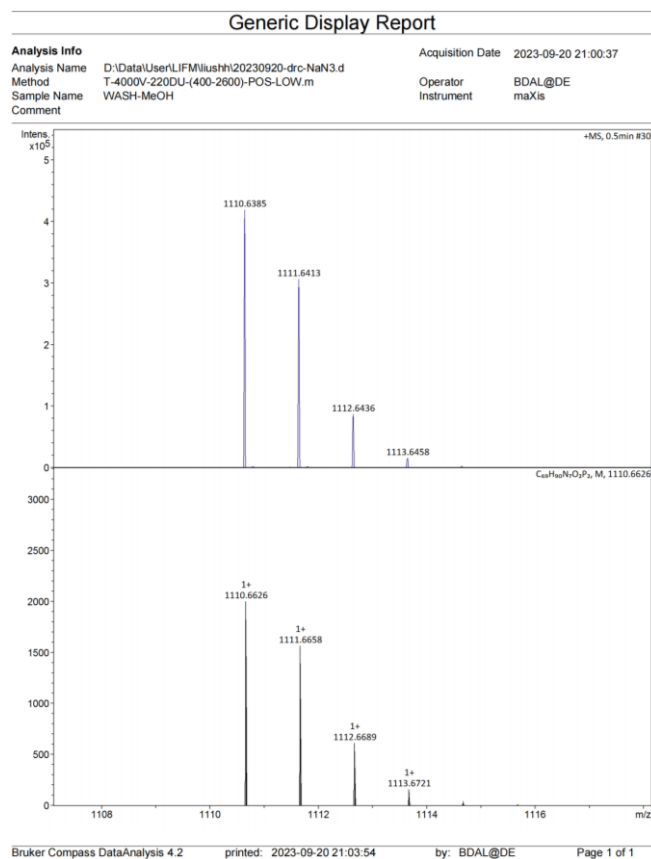

**Figure S22.** ESI-MS of  $6^+(\text{BAr}^{\text{F}})$ .

**Preparation of 7<sup>+</sup>(BAR<sup>F</sup>):** (Trimethylsilyl)diazomethane (1 equivalent in hexane, 1.0 M) was added dropwise to a stirred solution of 2b<sup>+</sup>(BAR<sup>F</sup>) (188.9 mg, 0.1 mmol) in tetrahydrofuran (10 mL) at room temperature. After stirring for 0.5 hour, the solvent was removed under reduced pressure. Then, the remaining solid was washed with hexane and dried *in vacuo* to afford green powder as 7<sup>+</sup>(BAR<sup>F</sup>), 148.0 mg, 0.075 mmol, 75.0% yield. Green crystals of 7<sup>+</sup>(BAR<sup>F</sup>) were obtained from a solution of hexane and tetrahydrofuran at room temperature. M. P. = 210.2 °C (Decomposition). UV/Vis (THF,  $\lambda$  (nm)  $\epsilon$  (M<sup>-1</sup>cm<sup>-1</sup>)):325 (37201), 382.5 (9900), 522 (13621).

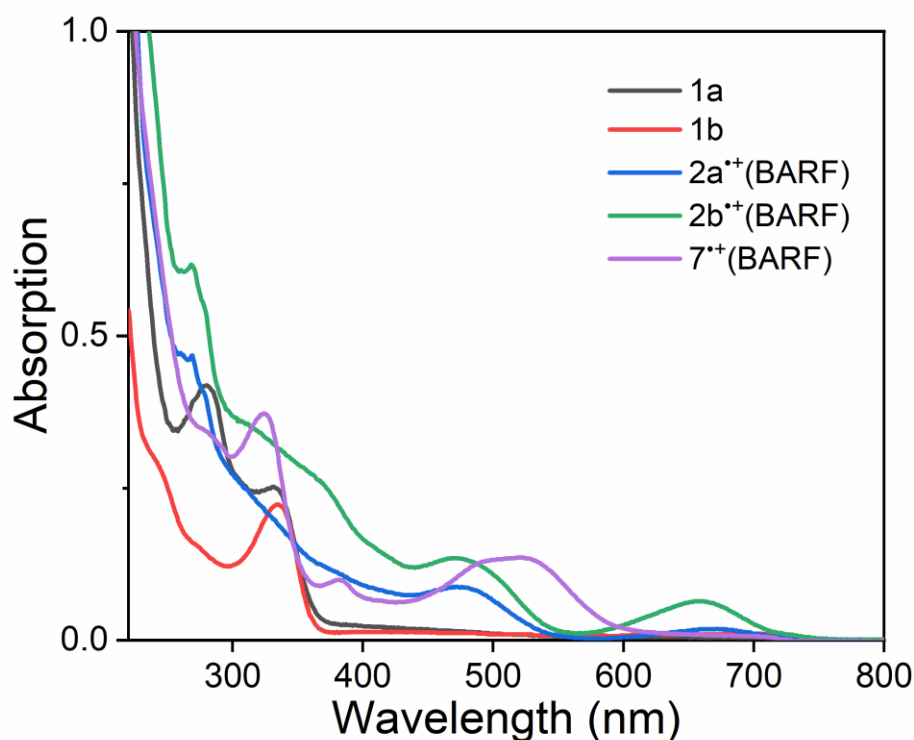

**Figure S23.** UV/Vis absorption spectra for 10<sup>-5</sup> M tetrahydrofuran solution of **1a**, **1b**, **2a<sup>+</sup>(BAR<sup>F</sup>)**, **2b<sup>+</sup>(BAR<sup>F</sup>)** and **7<sup>+</sup>(BAR<sup>F</sup>)**.

## S2. X-Ray Diffraction Studies

These data can be obtained free of charge via <http://www.ccdc.cam.ac.uk/cgi-bin/catreq.cgi>, or by emailing [data\\_request@ccdc.cam.ac.uk](mailto:data_request@ccdc.cam.ac.uk). The CCDC reference numbers are 2215136 - 2215138, 2215140 - 221543 and 2314776.

**Table S1.** The summary of crystal data and structure refinement.

| Compounds                          | <b>1a</b>                                                                                    | <b>2a<sup>++</sup></b> (BAr <sup>F</sup> )                                                      | <b>2b<sup>++</sup></b> (BAr <sup>F</sup> )                                                                    | <b>3</b>                                                                     |
|------------------------------------|----------------------------------------------------------------------------------------------|-------------------------------------------------------------------------------------------------|---------------------------------------------------------------------------------------------------------------|------------------------------------------------------------------------------|
| CCDC                               | 2215137                                                                                      | 2215142                                                                                         | 2215138                                                                                                       | 2215136                                                                      |
| Empirical formula                  | C <sub>71</sub> H <sub>93</sub> N <sub>5</sub> O <sub>2</sub> P <sub>2</sub>                 | C <sub>101</sub> H <sub>102</sub> BF <sub>24</sub> N <sub>4</sub> O <sub>2</sub> P <sub>2</sub> | C <sub>195</sub> H <sub>203</sub> N <sub>8</sub> O <sub>8</sub> B <sub>2</sub> F <sub>48</sub> P <sub>4</sub> | C <sub>72</sub> H <sub>97</sub> N <sub>4</sub> O <sub>2</sub> P <sub>2</sub> |
| Formula weight                     | 1110.44                                                                                      | 1932.61                                                                                         | 3844.14                                                                                                       | 1112.47                                                                      |
| Temperature/K                      | 149.99(10)                                                                                   | 150.0                                                                                           | 103(5)                                                                                                        | 149.99(10)                                                                   |
| Crystal system                     | orthorhombic                                                                                 | triclinic                                                                                       | triclinic                                                                                                     | monoclinic                                                                   |
| Space group                        | Pna2 <sub>1</sub>                                                                            | P-1                                                                                             | P-1                                                                                                           | P2 <sub>1</sub> /n                                                           |
| a/Å                                | 30.4484(2)                                                                                   | 12.9969(5)                                                                                      | 14.7749(2)                                                                                                    | 12.33630(10)                                                                 |
| b/Å                                | 15.17880(10)                                                                                 | 20.0236(7)                                                                                      | 16.5982(2)                                                                                                    | 22.0219(2)                                                                   |
| c/Å                                | 14.02580(10)                                                                                 | 20.1523(7)                                                                                      | 20.9941(2)                                                                                                    | 24.3308(3)                                                                   |
| α/°                                | 90                                                                                           | 106.472(2)                                                                                      | 72.2590(10)                                                                                                   | 90                                                                           |
| β/°                                | 90                                                                                           | 101.180(2)                                                                                      | 77.1930(10)                                                                                                   | 96.0520(10)                                                                  |
| γ/°                                | 90                                                                                           | 96.412(2)                                                                                       | 89.9430(10)                                                                                                   | 90                                                                           |
| Volume/Å <sup>3</sup>              | 6482.31(8)                                                                                   | 4855.8(3)                                                                                       | 4769.40(10)                                                                                                   | 6573.08(11)                                                                  |
| Z                                  | 4                                                                                            | 2                                                                                               | 1                                                                                                             | 4                                                                            |
| ρ <sub>calc</sub> /cm <sup>3</sup> | 1.138                                                                                        | 1.322                                                                                           | 1.338                                                                                                         | 1.124                                                                        |
| μ/mm <sup>-1</sup>                 | 0.967                                                                                        | 0.141                                                                                           | 1.279                                                                                                         | 0.949                                                                        |
| F(000)                             | 2400.0                                                                                       | 2006.0                                                                                          | 1995.0                                                                                                        | 2412.0                                                                       |
| Crystal size/mm <sup>3</sup>       | 0.2 × 0.1 × 0.1                                                                              | 0.03 × 0.03 × 0.01                                                                              | 0.21 × 0.16 × 0.14                                                                                            | 0.3 × 0.1 × 0.1                                                              |
| Radiation                          | CuKα (λ = 1.54184)                                                                           | MoKα (λ = 0.71073)                                                                              | Cu Kα (λ = 1.54184)                                                                                           | Cu Kα (λ = 1.54184)                                                          |
| 2θ range for data collection/°     | 5.806 to 148.304                                                                             | 2.154 to 54.286                                                                                 | 5.604 to 148.584                                                                                              | 5.426 to 148.152                                                             |
| Index ranges                       | -37 ≤ h ≤ 33, -18 ≤ k ≤ 16, -25 ≤ l ≤ 18, -20 ≤ k ≤ -15 ≤ h ≤ 13, -27 ≤ k ≤ 18, -17 ≤ l ≤ 16 | 25, -24 ≤ l ≤ 24                                                                                | 20, -26 ≤ l ≤ 26                                                                                              | 19, -30 ≤ l ≤ 28                                                             |
| Reflections collected              | 44409                                                                                        | 92619                                                                                           | 57770                                                                                                         | 37571                                                                        |
| Independent reflections            | 12612 [R <sub>int</sub> = 0.0382,                                                            | 20436 [R <sub>int</sub> = 0.0901,                                                               | 18754 [R <sub>int</sub> = 0.0397,                                                                             | 12964 [R <sub>int</sub> = 0.0677,                                            |

|                                                | $R_{\text{sigma}} = 0.0340]$                   | $R_{\text{sigma}} = 0.0924]$                                 | $R_{\text{sigma}} = 0.0374]$            | $R_{\text{sigma}} = 0.0608]$            |
|------------------------------------------------|------------------------------------------------|--------------------------------------------------------------|-----------------------------------------|-----------------------------------------|
| Data/restraints/parameters                     | 12612/7/741                                    | 20436/258/1511                                               | 18754/0/1211                            | 12964/0/726                             |
| Goodness-of-fit on $F^2$                       | 1.034                                          | 1.024                                                        | 1.041                                   | 1.039                                   |
| Final R indexes [ $I \geq 2\sigma(I)$ ]        | $R_1 = 0.0331, wR_2 = R_1 = 0.0890,$<br>0.0800 | $wR_2 = R_1 = 0.0607,$<br>0.1776                             | $wR_2 = R_1 = 0.0572, wR_2 =$<br>0.1652 | $wR_2 = R_1 = 0.0572, wR_2 =$<br>0.1634 |
| Final R indexes [all data]                     | $R_1 = 0.0341, wR_2 = R_1 = 0.1929,$<br>0.0895 | $wR_2 = R_1 = 0.0694, wR_2 = R_1 = 0.0640, wR_2 =$<br>0.2327 | $wR_2 = R_1 = 0.0640, wR_2 =$<br>0.1720 | $wR_2 = R_1 = 0.0640, wR_2 =$<br>0.1699 |
| Largest diff. peak/hole / $e \text{ \AA}^{-3}$ | 0.38/-0.27                                     | 0.38/-0.32                                                   | 1.37/-0.60                              | 0.55/-0.53                              |
| Flack parameter                                | 0.007(6)                                       |                                                              |                                         |                                         |

to be continued:

| Compounds                        | <b>4<sup>+</sup>(BAr<sup>F</sup>)</b> | <b>5</b>                           | <b>6<sup>+</sup>(BAr<sup>F</sup>)</b> | <b>7<sup>+</sup>(BAr<sup>F</sup>)</b> |
|----------------------------------|---------------------------------------|------------------------------------|---------------------------------------|---------------------------------------|
| CCDC                             | 2215140                               | 2215143                            | 2314776                               | 2215141                               |
| Empirical formula                | $C_{107}H_{107}BF_{24}N_4O_2P_2S$     | $C_{300}H_{380}F_4N_{16}O_8P_8S_4$ | $C_{102}H_{104}BF_{24}N_7O_2P_2$      | $C_{100}H_{108}BF_{24}N_4O_4P_2Si$    |
| Formula weight                   | 2041.77                               | 4790.18                            | 1988.67                               | 1986.74                               |
| Temperature/K                    | 149.98(10)                            | 149.99(10)                         | 100.00(10)                            | 150.0                                 |
| Crystal system                   | triclinic                             | monoclinic                         | triclinic                             | triclinic                             |
| Space group                      | P-1                                   | P2/n                               | P-1                                   | P-1                                   |
| $a/\text{\AA}$                   | 15.1726(2)                            | 26.0037(8)                         | 12.4929(2)                            | 13.4882(6)                            |
| $b/\text{\AA}$                   | 16.6364(2)                            | 13.0979(3)                         | 18.7651(3)                            | 17.4109(7)                            |
| $c/\text{\AA}$                   | 21.9306(2)                            | 40.7620(9)                         | 22.0705(2)                            | 22.7720(9)                            |
| $\alpha/^\circ$                  | 103.6170(10)                          | 90                                 | 106.6200(10)                          | 87.067(2)                             |
| $\beta/^\circ$                   | 108.0100(10)                          | 95.402(2)                          | 95.6430(10)                           | 73.300(2)                             |
| $\gamma/^\circ$                  | 91.8250(10)                           | 90                                 | 92.8630(10)                           | 89.995(2)                             |
| Volume/ $\text{\AA}^3$           | 5083.56(11)                           | 13821.6(6)                         | 4917.25(12)                           | 5115.0(4)                             |
| Z                                | 2                                     | 2                                  | 2                                     | 2                                     |
| $\rho_{\text{calc}}/\text{cm}^3$ | 1.334                                 | 1.151                              | 1.343                                 | 1.290                                 |

|                                                |                                                                |                                                                |                                                                |                                                                |
|------------------------------------------------|----------------------------------------------------------------|----------------------------------------------------------------|----------------------------------------------------------------|----------------------------------------------------------------|
| $\mu/\text{mm}^{-1}$                           | 1.405                                                          | 1.235                                                          | 1.253                                                          | 0.149                                                          |
| F(000)                                         | 2120.0                                                         | 5152.0                                                         | 2064.0                                                         | 2066.0                                                         |
| Crystal size/ $\text{mm}^3$                    | $0.1 \times 0.1 \times 0.05$                                   | $0.06 \times 0.06 \times 0$                                    | $0.2 \times 0.2 \times 0.15$                                   | $0.2 \times 0.2 \times 0.15$                                   |
| Radiation                                      | Cu K $\alpha$ ( $\lambda = 1.54184$ )                          | Cu K $\alpha$ ( $\lambda = 1.54184$ )                          | Cu K $\alpha$ ( $\lambda = 1.54184$ )                          | MoK $\alpha$ ( $\lambda = 0.71073$ )                           |
| 2 $\theta$ range for data collection/ $^\circ$ | 5.502 to 148.654                                               | 7.082 to 148.88                                                | 4.208 to 151.558                                               | 2.342 to 54.274                                                |
| Index ranges                                   | $-15 \leq h \leq 18, -20 \leq k \leq 15, -32 \leq l \leq 32$   | $-16 \leq k \leq 15, -23 \leq l \leq 27$                       | $-17 \leq h \leq 17, -22 \leq k \leq 23, -27 \leq l \leq 27$   | $-22 \leq k \leq 22, -29 \leq l \leq 29$                       |
| Reflections collected                          | 63197                                                          | 85375                                                          | 160084                                                         | 157333                                                         |
| Independent reflections                        | 20085 [R <sub>int</sub> = 0.0309, R <sub>sigma</sub> = 0.0302] | 27437 [R <sub>int</sub> = 0.0798, R <sub>sigma</sub> = 0.0844] | 19570 [R <sub>int</sub> = 0.0974, R <sub>sigma</sub> = 0.0441] | 22499 [R <sub>int</sub> = 0.0465, R <sub>sigma</sub> = 0.0309] |
| Data/restraints/parameters                     | 20085/172/1383                                                 | 27437/0/1589                                                   | 19570/290/1527                                                 | 22499/79/1275                                                  |
| Goodness-of-fit on F <sup>2</sup>              | 1.073                                                          | 1.052                                                          | 1.080                                                          | 1.079                                                          |
| Final R indexes [I >= 2 $\sigma$ (I)]          | R <sub>1</sub> = 0.0781, wR <sub>2</sub> = 0.2170              | R <sub>1</sub> = 0.0721, wR <sub>2</sub> = 0.1984              | R <sub>1</sub> = 0.0953, wR <sub>2</sub> = 0.2679              | R <sub>1</sub> = 0.0638, wR <sub>2</sub> = 0.1762              |
| Final R indexes [all data]                     | R <sub>1</sub> = 0.0909, wR <sub>2</sub> = 0.2281              | R <sub>1</sub> = 0.0996, wR <sub>2</sub> = 0.2163              | R <sub>1</sub> = 0.1259, wR <sub>2</sub> = 0.2913              | R <sub>1</sub> = 0.0787, wR <sub>2</sub> = 0.1867              |
| Largest diff. peak/hole / e $\text{\AA}^{-3}$  | 1.27/-0.75                                                     | 1.42/-1.25                                                     | 1.20/-0.83                                                     | 1.31/-0.87                                                     |
| Flack parameter                                |                                                                |                                                                |                                                                |                                                                |

**Table S2.** The comparison of structure parameters.

|                       | P2-C1      | P2-C3      | C1-C2    | C3-C4    | P1-C1      | P1-C6      | C6-C5    | C5-C3    |
|-----------------------|------------|------------|----------|----------|------------|------------|----------|----------|
| <b>2a<sup>+</sup></b> | 1.735(4)   | 1.719(4)   | 1.444(6) | 1.470(5) | 1.785(5)   | 1.725(5)   | 1.412(6) | 1.455(6) |
| <b>2b<sup>+</sup></b> | 1.767(2)   | 1.724(2)   | 1.424(3) | 1.479(3) | 1.793(2)   | 1.747(3)   | 1.373(3) | 1.458(3) |
| <b>3</b>              | 1.7911(19) | 1.8387(17) | 1.365(3) | 1.383(2) | 1.8075(19) | 1.8408(17) | 1.376(2) | 1.468(2) |
| <b>4<sup>+</sup></b>  | 1.752(3)   | 1.723(3)   | 1.432(5) | 1.473(4) | 1.808(4)   | 1.818(3)   | 1.363(4) | 1.487(4) |
| <b>5</b>              | 1.801(3)   | 1.798(3)   | 1.393(4) | 1.395(3) | 1.798(3)   | 1.825(3)   | 1.361(4) | 1.489(3) |
| <b>6<sup>+</sup></b>  | 1.746(4)   | 1.723(4)   | 1.415(5) | 1.470(5) | 1.794(3)   | 1.814(4)   | 1.359(5) | 1.483(4) |
| <b>7<sup>+</sup></b>  | 1.743(2)   | 1.789(2)   | 1.414(3) | 1.498(3) | 1.743(2)   | 1.867(2)   | 1.487(3) | 1.381(3) |

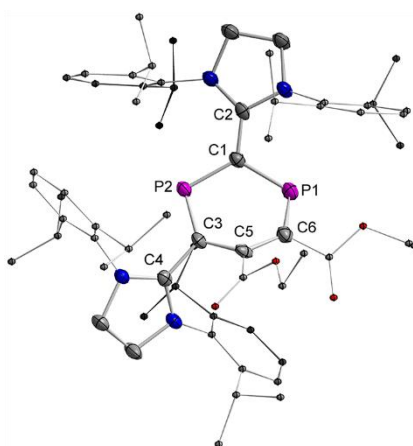

**Figure S24.** Molecular structure of  $2b^{+}(\text{BARF}^{-})$  in the solid state (H atoms, solvents and anions were omitted for clarity; 50% probability thermal ellipsoids). Selected distances [Å] and angles [°]: P1-C1 1.793(2), P1-C6 1.747(3), C6-C5 1.373(3), C5-C3 1.458(3), C3-P2 1.724(2), P2-C1 1.767(2), C1-C2 1.424(3), C3-C4 1.479(3), P1-C1-P2 120.41(13), P1-C1-C2 113.38(16), C2-C1-P2 125.47(18), C1-P2-C3 103.82(11), P2-C3-C4 118.81(16), P2-C3-C5 125.59(17), C4-C3-C5 115.6(2), C3-C5-C6 122.7(2), C5-C6-P1 125.87(19), C6-P1-C1 102.01(11).

### S3: EPR analysis

**Table S3.** Spin Hamiltonian parameters and spin populations from CW EPR experiments at RT and 100 K. All EPR data was processed and analyzed in Matlab R2019b and simulated using the EasySpin package (v. 5.2)

| Interaction                                 | Principal Values |        |        | Isotropic Values |
|---------------------------------------------|------------------|--------|--------|------------------|
|                                             | 1                | 2      | 3      |                  |
| <b><math>2a^{+}(\text{BARF}^{-})</math></b> |                  |        |        |                  |
| g-matrix                                    | 2.0042           | 2.0091 | 2.0130 | 2.0105           |
| $^{31}\text{P}$                             | -23.1            | 5.05   | 342.1  | 108              |
| $^{31}\text{P}$                             | -25.3            | 10.58  | 49.23  | 11.5             |
| <b><math>2b^{+}(\text{BARF}^{-})</math></b> |                  |        |        |                  |
| g-matrix                                    | N.A.             | N.A.   | N.A.   | 2.0077           |
| $^{31}\text{P}$                             | N.A.             | N.A.   | N.A.   | 85.7             |
| <b><math>7^{+}(\text{BARF}^{-})</math></b>  |                  |        |        |                  |
| g-matrix                                    | 2.0041           | 2.0165 | 2.0081 | 2.0096           |

|                 |      |      |       |       |
|-----------------|------|------|-------|-------|
| $^{31}\text{P}$ | -1.9 | -2.8 | 317.7 | 104.4 |
|-----------------|------|------|-------|-------|

N.A. equals “not available”.

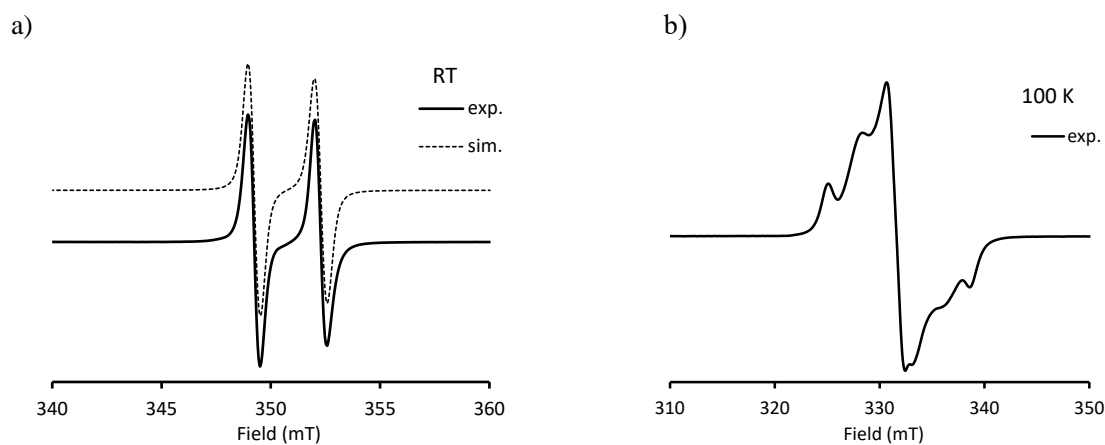

**Figure S25.** Continuous wave EPR spectra of  $2\mathbf{b}^+(\text{BAr}^{\text{F}})$  at RT and at 100 K.

## S4: Theoretical Details

Geometry optimizations were performed using the Gaussian16 optimizer.<sup>[2]</sup> All geometry optimizations were computed using the functional M06-2X functional. The Def2-SVP basis set was used for all the atoms. Frequency calculations at the same level of theory were performed to identify the number of imaginary frequencies (zero for local minimum and one for transition states) and provide the thermal corrections of Gibbs free energy. Transition states were submitted to intrinsic reaction coordinate (IRC) calculations to determine two corresponding minima. The single-point energy calculations were performed at the M06-2X/Def2-TZVP level of theory for solution-phase (diethyl ether). The gas-phase geometry was used for all the solution phase calculations. The SMD method was used with the corresponding solvent, while the Bondi radii were chosen as the atomic radii to define the molecular cavity.<sup>[3]</sup> The Gibbs energy corrections from frequency calculations were added to the single-point energies to obtain the Gibbs free energies in solution, respectively. All the solution-phase free energies reported in the paper correspond to the reference state of 1 mol/L, 298K. NBO calculations were carried out using NBO 7.0 program<sup>[4]</sup> at the M06-2X/Def2-TZVP//M06-2X/Def2-SVP level of theory.



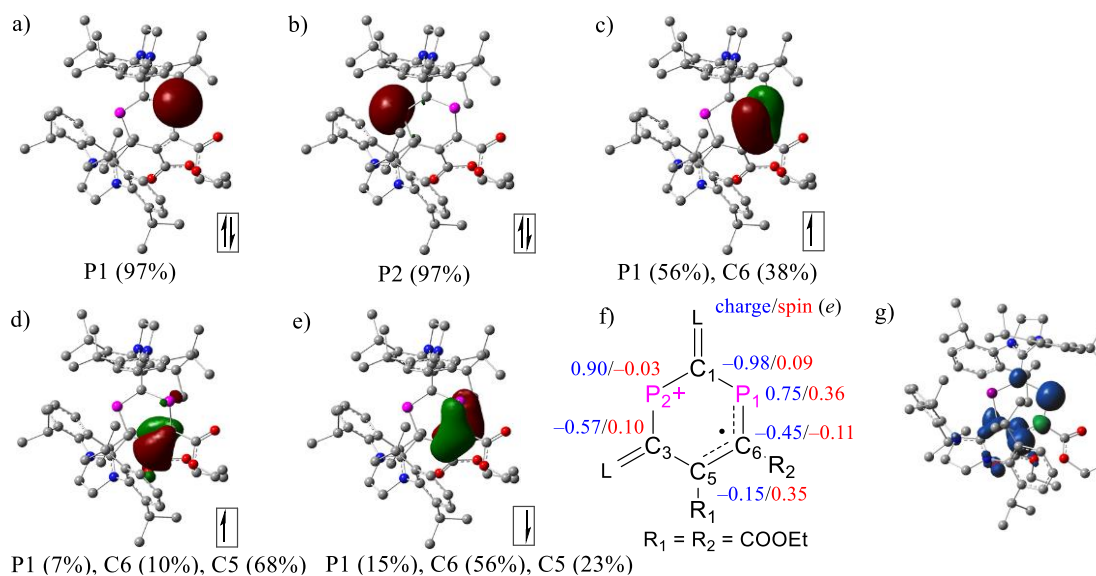

**Figure S26.** Selected NLMOs resulting from an NBO analysis of  $2b^{++}$  (isovalue = 0.05; results for doubly occupied orbitals were obtained by averaging over the  $\alpha$  and  $\beta$  spin orbitals): a) and b) unpaired s-type lone pairs; c) a  $\pi$ -bond  $\alpha$ -electron; d) a  $\pi$ -type  $\alpha$ -electron lone pair; e) a  $\pi$ -bond  $\beta$ -electron; f) selected NPA charges and spin populations; g) calculated spin density (density = 0.004) of  $2b^{++}$ .

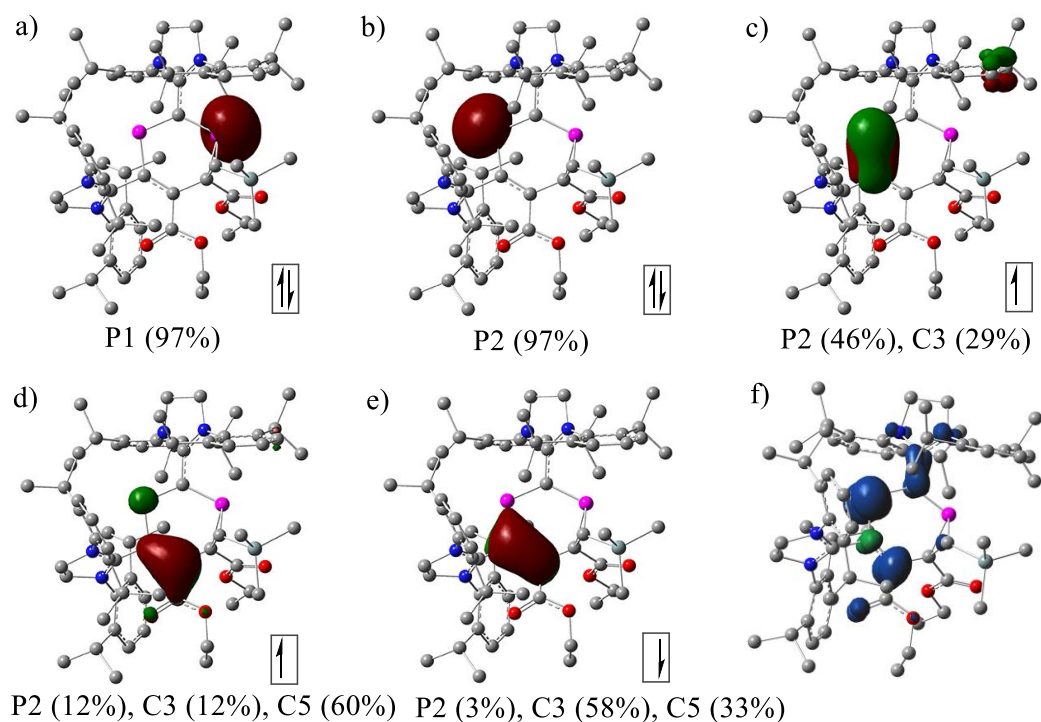

**Figure S27.** Selected NLMOs resulting from an NBO analysis of  $7^{++}$  (isovalue = 0.05; results for doubly occupied orbitals were obtained by averaging over the  $\alpha$  and  $\beta$  spin orbitals): a) and b) unpaired s-type lone pairs; c) a  $\pi$ -bond  $\alpha$ -electron; d) a  $\pi$ -type  $\alpha$ -electron lone pair; e) a  $\pi$ -bond  $\beta$ -electron; f) calculated spin density (density = 0.004) of  $7^{++}$ .

Cartesian Coordinates:

| <b>1a<sup>+</sup></b> , E(solvation) = -3735.36793354 |             |             |             |   |             |             |             |
|-------------------------------------------------------|-------------|-------------|-------------|---|-------------|-------------|-------------|
| P                                                     | 19.00888400 | 10.16822900 | 6.61340500  | C | 14.95762300 | 8.28319800  | 4.89997900  |
| P                                                     | 19.14040000 | 12.30749100 | 7.79670700  | H | 14.18517800 | 7.74335500  | 5.45209000  |
| O                                                     | 22.74970800 | 10.61496900 | 5.06769000  | C | 22.45652900 | 8.56837700  | 10.49133000 |
| N                                                     | 19.33735800 | 8.53701400  | 9.57513700  | H | 21.54151200 | 8.33211000  | 11.05012700 |
| N                                                     | 16.41234100 | 11.68261300 | 4.67763200  | H | 23.02249300 | 9.31471400  | 11.06942200 |
| N                                                     | 16.96946600 | 13.68342600 | 5.49489400  | H | 23.06221700 | 7.65189900  | 10.43200500 |
| N                                                     | 18.78763900 | 10.30374900 | 10.79298400 | C | 21.52960400 | 10.13253200 | 5.25210100  |
| C                                                     | 18.98513500 | 10.60992600 | 8.37116300  | C | 16.66546800 | 8.30125900  | 3.19777400  |
| C                                                     | 20.86867000 | 12.03472200 | 6.92852200  | H | 17.21603100 | 7.77392300  | 2.41933900  |
| C                                                     | 17.24612500 | 12.33335000 | 5.54197900  | C | 18.93954900 | 9.22421500  | 11.76749000 |
| C                                                     | 20.75004200 | 10.86566300 | 6.28281900  | H | 18.09482800 | 9.22580000  | 12.46916900 |
| O                                                     | 21.03991800 | 9.20839000  | 4.64709900  | H | 19.87170600 | 9.34539800  | 12.34680000 |
| C                                                     | 17.96977300 | 14.70225900 | 5.65556200  | C | 21.16089600 | 11.74818700 | 11.62610000 |
| C                                                     | 15.28313500 | 9.59123300  | 5.27387100  | H | 21.06984400 | 10.72115400 | 11.24721200 |
| C                                                     | 18.17486200 | 11.75491800 | 6.36316800  | C | 23.65979000 | 10.07899600 | 4.05590700  |
| C                                                     | 19.05523500 | 9.87348600  | 9.53023200  | C | 21.47272000 | 14.39317300 | 7.35151700  |
| C                                                     | 17.34989900 | 12.23590700 | 11.23779400 | H | 20.40811200 | 14.62979200 | 7.42677500  |
| C                                                     | 16.25464600 | 10.27037700 | 4.51656500  | C | 18.97224900 | 14.85154200 | 4.66924900  |
| C                                                     | 21.88864400 | 13.08179200 | 7.06369400  | C | 21.29560100 | 6.35799400  | 6.55535800  |
| C                                                     | 17.84558600 | 15.61754800 | 6.71785900  | H | 21.80646000 | 5.79302400  | 5.77437500  |
| C                                                     | 19.58662000 | 13.63135700 | 12.21423800 | C | 17.64996500 | 5.25158900  | 8.89315700  |
| H                                                     | 20.45086600 | 14.18612800 | 12.58511100 | H | 18.01611900 | 4.39453000  | 8.30778300  |
| C                                                     | 17.82207300 | 6.55149400  | 8.09889900  | H | 16.58993800 | 5.07462900  | 9.12663000  |
| H                                                     | 17.43039200 | 7.38636200  | 8.70144300  | H | 18.21485500 | 5.27181400  | 9.83646600  |
| C                                                     | 16.99342500 | 9.62473000  | 3.50223900  | C | 15.91334500 | 13.94958500 | 4.51252800  |
| C                                                     | 16.13149900 | 11.54031600 | 10.65686900 | H | 16.35417500 | 14.37736100 | 3.59624600  |
| H                                                     | 16.45355700 | 10.56084700 | 10.27230000 | H | 15.17799400 | 14.66262100 | 4.90799300  |
| C                                                     | 20.00079000 | 7.80734800  | 8.54249200  | C | 18.74339700 | 16.69066500 | 6.77967200  |
| C                                                     | 22.15743200 | 9.09770700  | 9.08252500  | H | 18.64780600 | 17.42233600 | 7.58404500  |
| H                                                     | 21.53983600 | 10.00728200 | 9.17512300  | C | 23.26773300 | 12.82033700 | 6.97341000  |
| C                                                     | 16.73568900 | 15.50636500 | 7.74536300  | H | 23.60709600 | 11.81167500 | 6.76074200  |
| H                                                     | 16.26335800 | 14.52185000 | 7.61189800  | C | 18.31865400 | 14.19798200 | 12.29363400 |
| C                                                     | 21.36570100 | 8.07899100  | 8.27281600  | H | 18.19039400 | 15.18941100 | 12.73079500 |
| C                                                     | 17.21544700 | 13.50595200 | 11.80487400 | C | 15.32195300 | 12.56571300 | 4.26336300  |
| H                                                     | 16.22591400 | 13.96501500 | 11.85816500 | H | 14.42572900 | 12.38580300 | 4.88114800  |
| C                                                     | 19.76769000 | 12.35030600 | 11.68514500 | H | 15.05443900 | 12.38949000 | 3.21341500  |
| C                                                     | 18.63332900 | 11.65801200 | 11.21469000 | C | 18.96129900 | 7.97854400  | 10.87314800 |
| C                                                     | 19.28858700 | 6.82896500  | 7.82851100  | H | 19.69241100 | 7.22524200  | 11.19437100 |
| C                                                     | 19.96358300 | 6.10107400  | 6.84118500  | H | 17.96828700 | 7.50121300  | 10.82466100 |
| H                                                     | 19.43006600 | 5.33253100  | 6.28031100  | C | 21.98461500 | 7.34109600  | 7.26264600  |
| C                                                     | 15.62682100 | 7.65031900  | 3.86016100  | H | 23.03037500 | 7.52609300  | 7.02227700  |
| H                                                     | 15.36158900 | 6.62893100  | 3.58284800  | C | 14.64580100 | 10.19507800 | 6.51487700  |
|                                                       |             |             |             | H | 15.00783200 | 11.22920700 | 6.62540400  |

|   |             |             |             |                                            |             |             |             |
|---|-------------|-------------|-------------|--------------------------------------------|-------------|-------------|-------------|
| C | 24.19287500 | 13.84016700 | 7.16933900  | H                                          | 16.45735200 | 15.47163400 | 9.89708700  |
| H | 25.25918300 | 13.61757800 | 7.10734000  | H                                          | 17.76043700 | 16.54880800 | 9.37416700  |
| C | 19.85833700 | 15.92547000 | 4.78770400  | C                                          | 18.88028700 | 14.75060500 | 2.16086400  |
| H | 20.64316700 | 16.05570000 | 4.03992100  | H                                          | 17.92711900 | 15.29953800 | 2.16770200  |
| C | 23.46620700 | 9.51214000  | 8.41138200  | H                                          | 18.88811400 | 14.08455400 | 1.28635900  |
| H | 24.20428000 | 8.69559300  | 8.43473000  | H                                          | 19.68497400 | 15.48803800 | 2.02498400  |
| H | 23.90550400 | 10.36781500 | 8.94371700  | C                                          | 17.50659500 | 11.29107000 | 1.67975900  |
| H | 23.31065700 | 9.80231400  | 7.36275400  | H                                          | 16.93652900 | 10.70696900 | 0.94176400  |
| C | 23.76527900 | 15.14013000 | 7.44533000  | H                                          | 18.31488400 | 11.81332600 | 1.14598500  |
| H | 24.49532700 | 15.93621400 | 7.59836200  | H                                          | 16.83664600 | 12.05094000 | 2.10479300  |
| C | 19.73984900 | 16.84700200 | 5.82326900  | C                                          | 22.04141900 | 12.51025800 | 10.63254800 |
| H | 20.42634200 | 17.69327400 | 5.88021100  | H                                          | 21.59232200 | 12.51489000 | 9.62872300  |
| C | 15.05296500 | 11.30606000 | 11.71868200 | H                                          | 23.03617900 | 12.04430300 | 10.55821700 |
| H | 15.44851600 | 10.73996000 | 12.57397200 | H                                          | 22.18151800 | 13.55825100 | 10.93897400 |
| H | 14.21002500 | 10.74197700 | 11.29291900 | C                                          | 20.41469400 | 13.19082400 | 3.41486300  |
| H | 14.65629800 | 12.25834400 | 12.10155900 | H                                          | 21.26640600 | 13.88326300 | 3.32752200  |
| C | 18.09203300 | 10.36237800 | 2.75067200  | H                                          | 20.43920900 | 12.51272400 | 2.54713800  |
| H | 18.62739200 | 10.98412900 | 3.49105300  | H                                          | 20.55795200 | 12.59397400 | 4.32601800  |
| C | 21.81171900 | 11.67752900 | 13.01038700 | C                                          | 19.11695600 | 9.42548100  | 2.11376600  |
| H | 21.98576300 | 12.68326500 | 13.42088900 | H                                          | 19.52570900 | 8.71586100  | 2.84489900  |
| H | 22.78665700 | 11.17170000 | 12.95108700 | H                                          | 19.95224000 | 10.01729600 | 1.71115300  |
| H | 21.18072600 | 11.12973500 | 13.72542300 | H                                          | 18.68080600 | 8.86875900  | 1.27072300  |
| C | 17.01734200 | 6.51999600  | 6.80063300  | C                                          | 23.03967300 | 10.23002900 | 2.67154900  |
| H | 17.16216300 | 7.44530100  | 6.22374000  | H                                          | 22.16720700 | 9.57716700  | 2.55270100  |
| H | 15.94409600 | 6.41218600  | 7.01547600  | H                                          | 23.78736800 | 9.96349000  | 1.91169000  |
| H | 17.30675300 | 5.67362200  | 6.16003600  | H                                          | 22.73902700 | 11.27487500 | 2.50597800  |
| C | 22.40118900 | 15.41409500 | 7.52955700  | C                                          | 13.11720600 | 10.22346600 | 6.43654700  |
| H | 22.05194600 | 16.42557900 | 7.74158700  | H                                          | 12.76590100 | 10.75302800 | 5.53913200  |
| C | 15.67183800 | 16.58482000 | 7.50690800  | H                                          | 12.69570300 | 10.72451300 | 7.32032200  |
| H | 16.09673800 | 17.58971400 | 7.65271400  | H                                          | 12.70220800 | 9.20511800  | 6.40458800  |
| H | 14.83561900 | 16.46563800 | 8.21117100  | C                                          | 24.88891900 | 10.96633700 | 4.19862700  |
| H | 15.27056200 | 16.54023800 | 6.48435800  | H                                          | 24.62197600 | 12.01945600 | 4.03216000  |
| C | 15.58073500 | 12.34759300 | 9.47451100  | H                                          | 25.65079800 | 10.67247900 | 3.46422400  |
| H | 15.34571800 | 13.37990800 | 9.77631600  | H                                          | 25.32090800 | 10.86731400 | 5.20533700  |
| H | 14.65385700 | 11.89841000 | 9.08899400  | C                                          | 23.99705500 | 8.62873700  | 4.38365200  |
| H | 16.31008700 | 12.38774200 | 8.64850900  | H                                          | 24.44291700 | 8.56135000  | 5.38729900  |
| C | 15.12312700 | 9.41991600  | 7.75082400  | H                                          | 24.73578200 | 8.25872400  | 3.65897600  |
| H | 14.87115900 | 8.35259600  | 7.66356000  | H                                          | 23.10470600 | 7.99259800  | 4.33437300  |
| H | 14.64252800 | 9.80113100  | 8.66344000  |                                            |             |             |             |
| H | 16.21586500 | 9.50909000  | 7.87218900  |                                            |             |             |             |
| C | 19.08307300 | 13.94620100 | 3.45132500  | <b>TS1</b> , E(solvation) = -3735.35414109 |             |             |             |
| H | 18.28712200 | 13.19047500 | 3.49908700  | P                                          | 0.84075500  | 0.83292300  | 0.5209350   |
| C | 17.27719200 | 15.58076400 | 9.17278100  | P                                          | -0.28940800 | -1.22992400 | -0.8184690  |
| H | 18.01066100 | 14.78375100 | 9.37059200  | O                                          | -1.36548200 | 0.70563800  | 3.4561690   |
|   |             |             |             | N                                          | 3.73105700  | -0.94222700 | 0.4091920   |

|   |             |             |            |   |             |             |            |
|---|-------------|-------------|------------|---|-------------|-------------|------------|
| N | -1.16606000 | 2.96860900  | -1.0949730 | C | -1.46365400 | 1.11674000  | 2.2020230  |
| N | -2.76861200 | 1.46258600  | -1.4208760 | C | 1.94412500  | 5.00068300  | -0.9496630 |
| N | 2.77120400  | -2.76648100 | -0.3795480 | H | 2.48846600  | 5.63131700  | -0.2451650 |
| C | 1.33104500  | -0.79266000 | -0.1003350 | C | 4.19921000  | -3.06432800 | -0.3992230 |
| C | -1.19378800 | -1.12098800 | 0.8339790  | H | 4.60711200  | -2.97072700 | -1.4207800 |
| C | -1.47272500 | 1.64563200  | -1.0770390 | H | 4.38689300  | -4.08511700 | -0.0397970 |
| C | -0.82773400 | 0.15464400  | 1.2488540  | C | 1.51737600  | -4.61758500 | 1.4299070  |
| O | -1.93005900 | 2.17014100  | 1.8362170  | H | 2.53695500  | -4.21021700 | 1.5165370  |
| C | -3.52146600 | 0.24057800  | -1.3571470 | C | -1.57944900 | 1.59831500  | 4.6033470  |
| C | 0.53897700  | 3.42137300  | -2.7965070 | C | -2.46642600 | -3.20037900 | 0.4931880  |
| C | -0.55681100 | 0.65090700  | -0.6463340 | H | -2.02224000 | -3.27758400 | -0.5008120 |
| C | 2.53512900  | -1.46945300 | -0.0147310 | C | -4.50670900 | 0.10029700  | -0.3574960 |
| C | 1.55421500  | -3.65478100 | -2.3049270 | C | 4.19353000  | 2.57130500  | 2.6610920  |
| C | 0.09464700  | 3.54976700  | -1.4631890 | H | 4.32395400  | 3.48384300  | 3.2451460  |
| C | -2.15037200 | -2.09623800 | 1.3125760  | C | 5.71624200  | 2.49449600  | -1.3306470 |
| C | -3.31156400 | -0.75633400 | -2.3387600 | H | 5.21204500  | 3.47285000  | -1.3079150 |
| C | 0.12057400  | -5.33904000 | -0.5685560 | H | 6.06902800  | 2.33382400  | -2.3587010 |
| H | -0.43081100 | -6.01275700 | 0.0894060  | H | 6.59384400  | 2.54154800  | -0.6704680 |
| C | 4.75728500  | 1.37405000  | -0.9322570 | C | -3.37978000 | 2.74946000  | -1.7910640 |
| H | 5.26268400  | 0.41174300  | -1.1170750 | H | -4.38830900 | 2.83047200  | -1.3752160 |
| C | 0.78050900  | 4.34819900  | -0.5281410 | H | -3.44573300 | 2.84040200  | -2.8867970 |
| C | 2.38550200  | -2.80564600 | -3.2505600 | C | -4.07413600 | -1.92408300 | -2.2537160 |
| H | 2.93214200  | -2.06560400 | -2.6456540 | H | -3.92783600 | -2.71658900 | -2.9863200 |
| C | 3.86139000  | 0.25633500  | 1.1747220  | C | -2.71961100 | -2.04023400 | 2.6036500  |
| C | 3.00082500  | -0.99985000 | 3.2450220  | H | -2.44057300 | -1.23195500 | 3.2779310  |
| H | 2.80559400  | -1.77727700 | 2.4899200  | C | -0.17504400 | -5.31263700 | -1.9296870 |
| C | -2.38190800 | -0.53288500 | -3.5234000 | H | -0.96108100 | -5.95768700 | -2.3262110 |
| H | -1.47784800 | -0.01897000 | -3.1603520 | C | -2.40255000 | 3.75370200  | -1.1849670 |
| C | 3.51976100  | 0.24416700  | 2.5399650  | H | -2.24756900 | 4.63868200  | -1.8139000 |
| C | 0.55225600  | -4.49750800 | -2.7934630 | H | -2.71029600 | 4.06897600  | -0.1740200 |
| H | 0.33787100  | -4.51805200 | -3.8638790 | C | 4.74801800  | -1.98550400 | 0.5280280  |
| C | 1.12917800  | -4.52863700 | -0.0382690 | H | 4.81949400  | -2.34073300 | 1.5709800  |
| C | 1.79769700  | -3.65498000 | -0.9195210 | H | 5.73161100  | -1.60665700 | 0.2207850  |
| C | 4.38394100  | 1.40340500  | 0.5421690  | C | 3.69475100  | 1.42610300  | 3.2691250  |
| C | 4.53180900  | 2.56104000  | 1.3094500  | H | 3.44989800  | 1.44484600  | 4.3330850  |
| H | 4.92956300  | 3.46739800  | 0.8534960  | C | -0.18481900 | 2.58042100  | -3.8350710 |
| C | 2.40169600  | 4.88272300  | -2.2579340 | H | -1.15225400 | 2.25980000  | -3.4213250 |
| H | 3.30391600  | 5.41056100  | -2.5710300 | C | -3.59126200 | -3.03205400 | 3.0357200  |
| C | 1.70402000  | 4.09803000  | -3.1693260 | H | -4.01707300 | -2.97549700 | 4.0386560  |
| H | 2.06841800  | 4.01169100  | -4.1946540 | C | -5.25325900 | -1.08282400 | -0.3313810 |
| C | 4.04261300  | -1.54291900 | 4.2312880  | H | -6.02114900 | -1.21451600 | 0.4325090  |
| H | 5.00877700  | -1.73565100 | 3.7433550  | C | 1.67817200  | -0.72436400 | 3.9624880  |
| H | 3.68978000  | -2.48007400 | 4.6865730  | H | 1.81714600  | 0.02122100  | 4.7605770  |
| H | 4.22226800  | -0.82078200 | 5.0421010  | H | 1.29137200  | -1.64148300 | 4.4302030  |

|   |             |             |            |                                            |             |             |             |
|---|-------------|-------------|------------|--------------------------------------------|-------------|-------------|-------------|
| H | 0.90744000  | -0.34682500 | 3.2750890  | H                                          | 0.27793900  | 6.76421800  | 0.7773100   |
| C | -3.90741700 | -4.11043600 | 2.2042010  | H                                          | -0.91873000 | 6.10599000  | 1.9200210   |
| H | -4.58630600 | -4.88993600 | 2.5527220  | H                                          | -1.23227200 | 6.06117000  | 0.1665980   |
| C | -5.03506800 | -2.08906200 | -1.2607150 | C                                          | 0.60922200  | -3.76372900 | 2.3185520   |
| H | -5.62151500 | -3.00793300 | -1.2171220 | H                                          | 0.61658400  | -2.70686900 | 2.0089040   |
| C | 3.40843400  | -3.68096600 | -3.9861580 | H                                          | 0.94378200  | -3.81974800 | 3.3658740   |
| H | 4.04446000  | -4.24215900 | -3.2865890 | H                                          | -0.43101200 | -4.12320200 | 2.2728400   |
| H | 4.05486400  | -3.06612100 | -4.6293410 | C                                          | -4.90887200 | 0.70541200  | 2.0740250   |
| H | 2.89359300  | -4.41519800 | -4.6242170 | H                                          | -5.68175400 | -0.06509200 | 2.2113600   |
| C | 0.23590900  | 4.58573600  | 0.8686290  | H                                          | -5.15017800 | 1.54103400  | 2.7455740   |
| H | -0.51934700 | 3.81038800  | 1.0663440  | H                                          | -3.95041000 | 0.27368700  | 2.3895700   |
| C | 1.55378300  | -6.06410900 | 1.9287900  | C                                          | 1.31819900  | 4.47262900  | 1.9422580   |
| H | 0.54374900  | -6.49566900 | 1.9873350  | H                                          | 1.77569000  | 3.47350000  | 1.9368680   |
| H | 1.98057500  | -6.10124900 | 2.9411290  | H                                          | 0.88776800  | 4.65643400  | 2.9368600   |
| H | 2.16150300  | -6.70414300 | 1.2736560  | H                                          | 2.11643800  | 5.21649500  | 1.7973460   |
| C | 3.50182200  | 1.41902000  | -1.8134050 | C                                          | -3.02947100 | 2.05721000  | 4.6668310   |
| H | 2.89993500  | 0.50600700  | -1.7167800 | H                                          | -3.29301200 | 2.66607200  | 3.7943230   |
| H | 3.77898100  | 1.53716500  | -2.8725470 | H                                          | -3.16802100 | 2.66001600  | 5.5754240   |
| H | 2.87171400  | 2.27766500  | -1.5311890 | H                                          | -3.70468300 | 1.19184300  | 4.7254040   |
| C | -3.33467800 | -4.19238300 | 0.9348220  | C                                          | -0.48971900 | 3.37003400  | -5.1111560  |
| H | -3.56581800 | -5.03621700 | 0.2821660  | H                                          | -1.05743100 | 4.28526200  | -4.8893050  |
| C | -3.05505100 | 0.37490200  | -4.5616450 | H                                          | -1.08233700 | 2.75634300  | -5.8050350  |
| H | -3.95213600 | -0.11433100 | -4.9696080 | H                                          | 0.43075600  | 3.66392300  | -5.6359080  |
| H | -2.36823300 | 0.57876200  | -5.3970830 | C                                          | -1.24451800 | 0.71382100  | 5.7950430   |
| H | -3.36743200 | 1.33565500  | -4.1339280 | H                                          | -1.90938400 | -0.16101000 | 5.8222600   |
| C | 1.52608000  | -2.02617100 | -4.2429580 | H                                          | -1.37581200 | 1.28056300  | 6.7265150   |
| H | 1.02946300  | -2.69727300 | -4.9603370 | H                                          | -0.20632000 | 0.36267300  | 5.7370510   |
| H | 2.14741100  | -1.32499100 | -4.8197420 | C                                          | -0.60846600 | 2.76650300  | 4.4888420   |
| H | 0.74993500  | -1.45272000 | -3.7182480 | H                                          | 0.41264700  | 2.39452300  | 4.3118230   |
| C | 0.62440200  | 1.31612300  | -4.1363120 | H                                          | -0.61393500 | 3.34096200  | 5.4256390   |
| H | 1.59500400  | 1.57285000  | -4.5891170 | H                                          | -0.89208400 | 3.43424100  | 3.6656930   |
| H | 0.08578400  | 0.65992600  | -4.8378140 |                                            |             |             |             |
| H | 0.82676200  | 0.75038700  | -3.2127700 | <b>IN1</b> , E(solvation) = -3735.39203599 |             |             |             |
| C | -4.85492800 | 1.20296900  | 0.6299320  | P                                          | 18.55031800 | 9.79855300  | 6.68965500  |
| H | -4.06712000 | 1.96871100  | 0.5917370  | P                                          | 18.65066900 | 12.31859400 | 7.92402800  |
| C | -1.93743500 | -1.82777800 | -4.1997100 | O                                          | 21.99655000 | 11.51845600 | 4.82466500  |
| H | -1.46760800 | -2.51948400 | -3.4839990 | N                                          | 19.21262100 | 8.48581500  | 9.57422100  |
| H | -1.20761700 | -1.59902500 | -4.9886890 | N                                          | 16.76512500 | 11.51550300 | 4.35776800  |
| H | -2.78366400 | -2.33586800 | -4.6850430 | N                                          | 17.72664500 | 13.46681000 | 4.67743200  |
| C | -6.20493900 | 1.83577700  | 0.2572750  | N                                          | 18.99597900 | 10.33073300 | 10.77724000 |
| H | -6.24651600 | 2.15881000  | -0.7929740 | C                                          | 18.82681900 | 10.52727100 | 8.29971900  |
| H | -6.41542100 | 2.70419100  | 0.8982690  | C                                          | 20.32069900 | 12.63827900 | 7.12981800  |
| H | -7.01768300 | 1.10777700  | 0.3995880  | C                                          | 17.66029600 | 12.18233700 | 5.08232400  |
| C | -0.45272300 | 5.95602800  | 0.9349550  | C                                          | 19.98799500 | 12.04007900 | 5.96022700  |

|   |             |             |             |   |             |             |             |
|---|-------------|-------------|-------------|---|-------------|-------------|-------------|
| O | 20.03728800 | 11.26843200 | 3.74159200  | H | 21.36862500 | 10.61073100 | 11.04490400 |
| C | 18.25502700 | 14.59590000 | 5.39856300  | C | 22.83001900 | 10.80367600 | 3.85232700  |
| C | 15.39771800 | 9.76780900  | 5.42264600  | C | 21.14628400 | 14.42799100 | 8.57598300  |
| C | 18.54553100 | 11.61899900 | 6.12420900  | H | 20.11009500 | 14.57993400 | 8.88777100  |
| C | 19.01051600 | 9.83964800  | 9.50047900  | C | 19.44561800 | 15.20195700 | 4.95691000  |
| C | 17.74820900 | 12.38235300 | 11.22458100 | C | 20.81780800 | 6.07561200  | 6.52914200  |
| C | 16.29299500 | 10.15653300 | 4.40495600  | H | 21.23987200 | 5.44520700  | 5.74517600  |
| C | 21.44543100 | 13.40835600 | 7.65571400  | C | 17.42761800 | 5.20534000  | 9.34488200  |
| C | 17.51670800 | 15.10758600 | 6.48939900  | H | 17.71905100 | 4.29437100  | 8.80023000  |
| C | 20.16952100 | 13.72143400 | 11.72620400 | H | 16.39593800 | 5.07135800  | 9.70183600  |
| H | 21.10102800 | 14.24431800 | 11.95160100 | H | 18.08890600 | 5.29227500  | 10.21909100 |
| C | 17.53181000 | 6.42901800  | 8.42739400  | C | 17.05686700 | 13.60977400 | 3.37727600  |
| H | 17.22663200 | 7.32203700  | 8.99598100  | H | 17.80648900 | 13.53594600 | 2.57284600  |
| C | 16.61001000 | 9.31919700  | 3.32262900  | H | 16.54898300 | 14.57762100 | 3.30206500  |
| C | 16.43600400 | 11.62118600 | 11.12800700 | C | 18.05949800 | 16.19569400 | 7.18167700  |
| H | 16.63455100 | 10.67138300 | 10.60854000 | H | 17.53229700 | 16.60583200 | 8.04110700  |
| C | 19.75339100 | 7.67582300  | 8.53162600  | C | 22.78165000 | 13.22354800 | 7.25772800  |
| C | 21.93815500 | 8.99850100  | 8.72690000  | H | 23.02352100 | 12.43086600 | 6.55341500  |
| H | 21.28444300 | 9.82650400  | 9.03548000  | C | 18.96323000 | 14.41339000 | 11.76578000 |
| C | 16.13304400 | 14.58590100 | 6.86118100  | H | 18.95337700 | 15.47660700 | 12.01162200 |
| H | 16.14862200 | 13.48256200 | 6.81955700  | C | 16.11942500 | 12.40947100 | 3.37872900  |
| C | 21.07241400 | 7.92241600  | 8.08820500  | H | 15.09870100 | 12.64483300 | 3.72070800  |
| C | 17.76322800 | 13.74533000 | 11.53340500 | H | 16.05726500 | 11.90932900 | 2.40564500  |
| H | 16.82208300 | 14.29107100 | 11.61926400 | C | 19.03093300 | 8.00257100  | 10.93926400 |
| C | 20.20765700 | 12.35941400 | 11.41186300 | H | 19.76790100 | 7.22312900  | 11.17378500 |
| C | 18.98489900 | 11.71395700 | 11.12680700 | H | 18.02166700 | 7.57746400  | 11.07416300 |
| C | 18.96393100 | 6.65358400  | 7.97922700  | C | 21.57971800 | 7.10733100  | 7.07530300  |
| C | 19.52431000 | 5.84962300  | 6.98094100  | H | 22.59574600 | 7.26700600  | 6.71279800  |
| H | 18.93136600 | 5.04578200  | 6.54155200  | C | 15.14102500 | 10.61850600 | 6.65734100  |
| C | 15.02217300 | 7.70539800  | 4.19146100  | H | 16.03626500 | 11.23714700 | 6.83256000  |
| H | 14.50733800 | 6.74772800  | 4.10232100  | C | 23.78405400 | 14.04113200 | 7.77255000  |
| C | 14.75966200 | 8.53510000  | 5.27906900  | H | 24.81903600 | 13.88262500 | 7.46566900  |
| H | 14.05331800 | 8.20515300  | 6.04074300  | C | 19.93392500 | 16.29736200 | 5.67488300  |
| C | 22.62727100 | 8.44522100  | 9.98005100  | H | 20.86083000 | 16.77691200 | 5.35949500  |
| H | 21.89239500 | 8.07848900  | 10.71310800 | C | 22.94909800 | 9.61640200  | 7.76364500  |
| H | 23.23717600 | 9.22241300  | 10.46523000 | H | 23.71991500 | 8.89688300  | 7.44629800  |
| H | 23.28655900 | 7.60360500  | 9.71969200  | H | 23.46647300 | 10.45379000 | 8.25644000  |
| C | 20.67957600 | 11.59336500 | 4.71731600  | H | 22.44103300 | 10.01160000 | 6.86971100  |
| C | 15.95959900 | 8.08298300  | 3.24027200  | C | 23.47297000 | 15.06105900 | 8.67428300  |
| H | 16.19098700 | 7.41220600  | 2.41084100  | H | 24.26320700 | 15.70264200 | 9.06704300  |
| C | 19.22022700 | 9.27631700  | 11.76660700 | C | 19.25790000 | 16.77997800 | 6.78678100  |
| H | 18.49555300 | 9.35817700  | 12.58770100 | H | 19.66045400 | 17.62661000 | 7.34482800  |
| H | 20.23402600 | 9.34193300  | 12.19274700 | C | 15.93577600 | 11.29713200 | 12.54276600 |
| C | 21.51402500 | 11.58827300 | 11.52480200 | H | 16.69450900 | 10.75661200 | 13.12627300 |

|   |             |             |             |                                            |             |             |             |
|---|-------------|-------------|-------------|--------------------------------------------|-------------|-------------|-------------|
| H | 15.02557200 | 10.68133700 | 12.50238500 | C                                          | 21.68244400 | 14.71487500 | 3.86693000  |
| H | 15.69896700 | 12.22369800 | 13.08756500 | H                                          | 22.09628900 | 15.72054200 | 4.02840200  |
| C | 17.65931900 | 9.68218000  | 2.28777100  | H                                          | 22.14438900 | 14.32216000 | 2.95121200  |
| H | 18.04132200 | 10.68687400 | 2.51489300  | H                                          | 21.98457000 | 14.08132500 | 4.71344700  |
| C | 21.83595500 | 11.35679100 | 13.00939800 | C                                          | 18.85253700 | 8.72990800  | 2.42007600  |
| H | 22.08057900 | 12.31240200 | 13.49767200 | H                                          | 19.23004800 | 8.72814400  | 3.45278800  |
| H | 22.70410400 | 10.68940100 | 13.11695800 | H                                          | 19.66640200 | 9.04555500  | 1.75073800  |
| H | 20.98782700 | 10.91885000 | 13.55494200 | H                                          | 18.56747600 | 7.70065400  | 2.15319700  |
| C | 16.58177600 | 6.30681800  | 7.23442800  | C                                          | 22.75832100 | 11.45554200 | 2.47674100  |
| H | 16.71737900 | 7.14743600  | 6.53875800  | H                                          | 21.73792400 | 11.43655000 | 2.07715200  |
| H | 15.53613100 | 6.30347800  | 7.57829500  | H                                          | 23.41566200 | 10.90080800 | 1.79247900  |
| H | 16.74742300 | 5.37155700  | 6.67865500  | H                                          | 23.11787500 | 12.49164200 | 2.52278800  |
| C | 22.15039000 | 15.25405800 | 9.07229100  | C                                          | 13.95407700 | 11.56761200 | 6.46769900  |
| H | 21.89912100 | 16.04874700 | 9.77716500  | H                                          | 14.11016400 | 12.24661100 | 5.61630600  |
| C | 15.07801100 | 15.08824200 | 5.86503700  | H                                          | 13.80741400 | 12.18347700 | 7.36901800  |
| H | 15.08031700 | 16.18793500 | 5.83253600  | H                                          | 13.02886500 | 11.00156600 | 6.28298000  |
| H | 14.07509400 | 14.75873700 | 6.17314400  | C                                          | 24.23015000 | 10.94168400 | 4.43496000  |
| H | 15.25156700 | 14.72172900 | 4.84557300  | H                                          | 24.50412700 | 12.00308000 | 4.52253800  |
| C | 15.36330900 | 12.36246900 | 10.33536600 | H                                          | 24.95796600 | 10.44790900 | 3.77711100  |
| H | 15.13168700 | 13.34413800 | 10.77369900 | H                                          | 24.28427900 | 10.47668700 | 5.42929100  |
| H | 14.42780300 | 11.78398100 | 10.33118100 | C                                          | 22.39025800 | 9.34429400  | 3.81509600  |
| H | 15.68482700 | 12.51707100 | 9.29439000  | H                                          | 22.34930500 | 8.92957900  | 4.83292800  |
| C | 14.96531400 | 9.74830600  | 7.90417500  | H                                          | 23.11561200 | 8.76251100  | 3.22930800  |
| H | 14.00069500 | 9.21975700  | 7.89881200  | H                                          | 21.40255300 | 9.24113800  | 3.35191100  |
| H | 14.99014200 | 10.37429900 | 8.80369400  |                                            |             |             |             |
| H | 15.77303700 | 9.00448800  | 7.97610100  |                                            |             |             |             |
| C | 20.16268000 | 14.75503400 | 3.69705400  | <b>TS2</b> , E(solvation) = -3735.37224976 |             |             |             |
| H | 19.82415900 | 13.73733300 | 3.45317200  | P                                          | 0.13668400  | 1.45717800  | -0.21997300 |
| C | 15.70925500 | 14.98827600 | 8.27177400  | P                                          | -0.83813200 | -0.91810600 | 1.10926600  |
| H | 16.46631700 | 14.70351700 | 9.01712600  | O                                          | 1.64768000  | -2.43868300 | -2.56913900 |
| H | 14.76231900 | 14.49499000 | 8.53011900  | N                                          | -2.98248000 | 2.21093800  | -0.68171400 |
| H | 15.53575200 | 16.07247100 | 8.33727100  | N                                          | 3.26505000  | 1.24732500  | 0.77644800  |
| C | 19.78637000 | 15.68229800 | 2.53165500  | N                                          | 3.18469900  | -0.93485800 | 1.17770100  |
| H | 18.69847300 | 15.74016000 | 2.38390600  | N                                          | -3.78081000 | 0.63212200  | 0.63231400  |
| H | 20.24589500 | 15.33353100 | 1.59536000  | C                                          | -1.33182200 | 0.59497700  | 0.19807500  |
| H | 20.14511100 | 16.70395300 | 2.72772800  | C                                          | -0.18027700 | -1.90370500 | -0.30744000 |
| C | 17.09857300 | 9.67290600  | 0.86269900  | C                                          | 2.50790200  | 0.14280100  | 0.68752200  |
| H | 16.76647500 | 8.66553400  | 0.57122500  | C                                          | 0.93442500  | -1.21522600 | -0.65230800 |
| H | 17.87203000 | 9.98577800  | 0.14684800  | O                                          | 2.87815900  | -0.69487300 | -1.89994700 |
| H | 16.23570800 | 10.34696000 | 0.75159400  | C                                          | 2.54672400  | -2.01089200 | 1.90305900  |
| C | 22.70213600 | 12.25122700 | 10.83021500 | C                                          | 2.39680300  | 3.46838100  | 1.34685300  |
| H | 22.53049300 | 12.36363100 | 9.75235500  | C                                          | 1.16860700  | 0.02239600  | 0.16702600  |
| H | 23.60480100 | 11.63817600 | 10.97450100 | C                                          | -2.65220300 | 1.11572700  | 0.05356700  |
| H | 22.91773900 | 13.24691900 | 11.24561200 | C                                          | -3.72529800 | -0.87020100 | 2.58659200  |
|   |             |             |             | C                                          | 2.95528600  | 2.59711700  | 0.38506900  |

|   |             |             |             |   |             |             |             |
|---|-------------|-------------|-------------|---|-------------|-------------|-------------|
| C | -0.82334700 | -3.15095000 | -0.75769300 | C | -3.33654400 | 6.00707700  | -0.44518300 |
| C | 2.05389000  | -1.74132300 | 3.19564700  | H | -2.85009800 | 6.79154800  | -1.04437200 |
| C | -4.77065400 | -2.91899600 | 0.96711500  | H | -3.78904400 | 6.48591200  | 0.43529200  |
| H | -5.17072500 | -3.72373500 | 0.34800800  | H | -4.14110500 | 5.57907000  | -1.06077500 |
| C | -2.30964800 | 4.94997500  | -0.01815300 | C | 4.58649100  | -0.57456300 | 1.42311600  |
| H | -2.81938100 | 4.19804100  | 0.60398600  | H | 5.22164000  | -0.98518200 | 0.62288900  |
| C | 3.29385800  | 3.04101900  | -0.90524500 | H | 4.92026500  | -0.98220900 | 2.38591900  |
| C | -3.20017400 | 0.24661900  | 3.47132300  | C | 1.33238300  | -2.73995700 | 3.85740000  |
| H | -2.59928300 | 0.91858900  | 2.83545900  | H | 0.93240600  | -2.54219600 | 4.85388700  |
| C | -2.13031400 | 2.92992800  | -1.57837900 | C | -0.91709000 | -3.55512500 | -2.09954900 |
| C | -2.24866900 | 0.96852200  | -3.23136700 | H | -0.52377900 | -2.90612000 | -2.87676600 |
| H | -2.80328800 | 0.51487400  | -2.39696000 | C | -4.47934300 | -3.16038700 | 2.30486300  |
| C | 2.36985300  | -0.45803400 | 3.94189200  | H | -4.65770200 | -4.14936000 | 2.73013300  |
| H | 2.86658800  | 0.23210500  | 3.24837200  | C | 4.56281900  | 0.95905700  | 1.39649300  |
| C | -1.71858900 | 2.31866200  | -2.78001800 | H | 4.61116900  | 1.41762900  | 2.39811800  |
| C | -3.97129800 | -2.14276400 | 3.10758200  | H | 5.36630900  | 1.38451400  | 0.78125500  |
| H | -3.75793600 | -2.34582000 | 4.15697100  | C | -4.43246000 | 2.37768400  | -0.76834000 |
| C | -4.55317300 | -1.65897600 | 0.40230000  | H | -4.79168500 | 2.00315800  | -1.74348000 |
| C | -3.99958400 | -0.65669700 | 1.22249400  | H | -4.70712000 | 3.43614200  | -0.67959900 |
| C | -1.74771400 | 4.23924700  | -1.23643200 | C | -0.82385400 | 3.01953400  | -3.59165000 |
| C | -0.85448600 | 4.90111000  | -2.08304300 | H | -0.47490000 | 2.56774200  | -4.52212600 |
| H | -0.52780600 | 5.91233100  | -1.83416100 | C | 2.04489300  | 3.01957100  | 2.75412900  |
| C | 2.47823300  | 5.24851100  | -0.30124600 | H | 2.09481100  | 1.92454400  | 2.77097600  |
| H | 2.29551100  | 6.29062100  | -0.56927700 | C | -1.52469400 | -4.76025100 | -2.43647600 |
| C | 2.18513700  | 4.79828200  | 0.98215500  | H | -1.58850300 | -5.05753400 | -3.48476800 |
| H | 1.77643100  | 5.49456600  | 1.71672400  | C | 1.72386100  | -4.26748400 | 2.04155500  |
| C | -3.23059000 | 1.15335100  | -4.39600500 | H | 1.61122200  | -5.26456500 | 1.61722900  |
| H | -4.04890100 | 1.83861500  | -4.13121100 | C | -1.13131900 | -0.00327500 | -3.61670300 |
| H | -3.66690700 | 0.18735200  | -4.69032900 | H | -0.55810800 | 0.36971400  | -4.47875900 |
| H | -2.71771700 | 1.57473700  | -5.27378600 | H | -1.56078000 | -0.97713700 | -3.89799800 |
| C | 1.91883800  | -1.42099300 | -1.76754800 | H | -0.43321500 | -0.16442700 | -2.78061600 |
| C | 3.02198800  | 4.37430600  | -1.23228000 | C | -2.06174500 | -5.58363400 | -1.44467600 |
| H | 3.26626800  | 4.73485400  | -2.23336700 | H | -2.53235700 | -6.53063000 | -1.71281800 |
| C | -4.91432600 | 1.53574300  | 0.40606100  | C | 1.13729100  | -3.98322400 | 3.27102000  |
| H | -5.08891600 | 2.15092900  | 1.30256000  | H | 0.56018800  | -4.75002400 | 3.79011800  |
| H | -5.82536400 | 0.96157200  | 0.19414000  | C | -4.36461600 | 1.05364800  | 4.06112900  |
| C | -4.87536800 | -1.42577200 | -1.06500800 | H | -5.02520000 | 1.45596900  | 3.28152000  |
| H | -4.86417800 | -0.34282500 | -1.25734200 | H | -3.98906400 | 1.89359500  | 4.66341600  |
| C | 2.39654800  | -2.66822200 | -3.80662300 | H | -4.97675800 | 0.41188900  | 4.71235900  |
| C | -1.39592900 | -3.97315900 | 0.22831800  | C | 3.95499000  | 2.15230400  | -1.93943000 |
| H | -1.35334700 | -3.66603300 | 1.27631300  | H | 4.07217200  | 1.15075400  | -1.51042600 |
| C | 2.46075000  | -3.30296700 | 1.34752200  | C | -6.26499100 | -1.94161100 | -1.44599700 |
| C | -0.37679100 | 4.28908200  | -3.23678500 | H | -6.31773700 | -3.03831000 | -1.38719800 |
| H | 0.32997200  | 4.81565700  | -3.88011800 | H | -6.50143800 | -1.65925900 | -2.48179800 |



|   |             |             |             |                                                       |             |             |             |
|---|-------------|-------------|-------------|-------------------------------------------------------|-------------|-------------|-------------|
| H | -7.04437000 | -1.53034400 | -0.78816200 | H                                                     | 2.92216300  | 2.97458600  | -3.68134300 |
| C | -1.21140100 | 5.57955200  | 0.83688400  | C                                                     | 3.89683800  | -2.80549400 | -3.55216200 |
| H | -0.44378400 | 4.83676600  | 1.08398800  | H                                                     | 4.35957200  | -1.84197700 | -3.31677900 |
| H | -1.63315500 | 5.97976800  | 1.77076800  | H                                                     | 4.36707100  | -3.21796100 | -4.45586200 |
| H | -0.72088300 | 6.41328200  | 0.31131100  | H                                                     | 4.08770400  | -3.50212800 | -2.72434100 |
| C | -2.00256600 | -5.18091600 | -0.11137700 | C                                                     | 3.05197200  | 3.56716000  | 3.77294000  |
| H | -2.42984600 | -5.80927500 | 0.67179600  | H                                                     | 4.08769700  | 3.30998300  | 3.50804100  |
| C | 3.35637000  | -0.74029100 | 5.08300400  | H                                                     | 2.84286800  | 3.17215700  | 4.77873800  |
| H | 2.89924500  | -1.39425100 | 5.84048100  | H                                                     | 2.99032100  | 4.66492100  | 3.82425800  |
| H | 3.65066700  | 0.19709800  | 5.57814100  | C                                                     | 1.82286600  | -3.97853300 | -4.33134300 |
| H | 4.26507600  | -1.24252000 | 4.72026200  | H                                                     | 1.96909200  | -4.78711700 | -3.60246200 |
| C | -2.29707700 | -0.26576700 | 4.59266800  | H                                                     | 2.32362400  | -4.25146700 | -5.26996700 |
| H | -2.87643000 | -0.79951900 | 5.36075600  | H                                                     | 0.74669800  | -3.88113200 | -4.53002400 |
| H | -1.80003700 | 0.57928500  | 5.09053000  | C                                                     | 2.08981700  | -1.52496000 | -4.76698600 |
| H | -1.52460600 | -0.94405200 | 4.20160700  | H                                                     | 1.01049200  | -1.48137700 | -4.97244400 |
| C | 0.61651900  | 3.40465800  | 3.14993500  | H                                                     | 2.61622300  | -1.69214100 | -5.71716200 |
| H | 0.48256100  | 4.49610200  | 3.17031900  | H                                                     | 2.41730600  | -0.56457000 | -4.34931800 |
| H | 0.38748000  | 3.02993700  | 4.15737900  |                                                       |             |             |             |
| H | -0.11875800 | 2.97843600  | 2.44942500  |                                                       |             |             |             |
| C | 3.24264600  | -3.69645900 | 0.10871100  | <b>2a<sup>+</sup></b> , E(solvation) = -3735.40759355 |             |             |             |
| H | 3.36973900  | -2.79903400 | -0.51392600 | P                                                     | 0.80387700  | 0.74056800  | -0.21873900 |
| C | 1.11840400  | 0.23965900  | 4.46844600  | P                                                     | 0.31686200  | -2.31128800 | 0.44927700  |
| H | 0.41577900  | 0.46891700  | 3.65180500  | O                                                     | -3.40019300 | 1.27337000  | 0.98469400  |
| H | 1.39045300  | 1.17807300  | 4.97400600  | N                                                     | -2.64934300 | 1.27776300  | -1.86309900 |
| H | 0.59587600  | -0.38908900 | 5.20348800  | O                                                     | -3.31835300 | -0.61704600 | 2.19580200  |
| C | 4.64957900  | -4.14886000 | 0.53192900  | N                                                     | 3.35106400  | -2.26529700 | 0.35661000  |
| H | 5.17147600  | -3.37303600 | 1.11044300  | N                                                     | -1.45452600 | 2.94841000  | -1.07710000 |
| H | 5.26005300  | -4.38942700 | -0.35130700 | C                                                     | -0.91923400 | 0.64179500  | -0.21295500 |
| H | 4.58843600  | -5.04871800 | 1.16219600  | C                                                     | -2.04007700 | -0.73652600 | -3.13792400 |
| C | 5.34242000  | 2.68537600  | -2.31447600 | C                                                     | -1.65728300 | 1.62343300  | -1.01995300 |
| H | 5.27670500  | 3.67084600  | -2.79980200 | C                                                     | 1.33706700  | -0.83172200 | 0.32808700  |
| H | 5.83636300  | 1.99925600  | -3.01757400 | C                                                     | 3.68018800  | -2.34354400 | -2.05968700 |
| H | 5.98761700  | 2.79416600  | -1.43013600 | C                                                     | -1.72415700 | -0.36386800 | 0.48731400  |
| C | -3.78659500 | -2.04501600 | -1.94133600 | C                                                     | -2.98551200 | -0.02260600 | -2.37030100 |
| H | -2.80542800 | -1.60519500 | -1.71101100 | C                                                     | -1.29637600 | -1.68386800 | 0.66731000  |
| H | -4.00151800 | -1.88255900 | -3.00940700 | C                                                     | 3.45163000  | -2.98164900 | -3.28234000 |
| H | -3.71038800 | -3.12871700 | -1.76185500 | H                                                     | 3.80259900  | -2.51687300 | -4.20629600 |
| C | 2.56205700  | -4.79443300 | -0.70852700 | C                                                     | 4.52713100  | -1.07797800 | -2.01894700 |
| H | 2.55098200  | -5.74675500 | -0.15882800 | H                                                     | 4.71031900  | -0.82066100 | -0.96568500 |
| H | 3.12309500  | -4.97872100 | -1.63508400 | C                                                     | 3.18980200  | -2.96219400 | -0.89271000 |
| H | 1.52927700  | -4.52888900 | -0.97647800 | C                                                     | 2.71007500  | -1.10181300 | 0.65689800  |
| C | 3.06686100  | 2.00555800  | -3.17803000 | N                                                     | 3.50275400  | -0.33708200 | 1.42648900  |
| H | 2.07816700  | 1.60538500  | -2.90675700 | C                                                     | -2.92075900 | 0.17863800  | 1.21271900  |
| H | 3.53630600  | 1.31816500  | -3.89669800 | C                                                     | -2.42820600 | -1.97302600 | -3.66256600 |
|   |             |             |             | H                                                     | -1.70957500 | -2.55457800 | -4.24162300 |

|   |             |             |             |   |             |             |             |
|---|-------------|-------------|-------------|---|-------------|-------------|-------------|
| C | -0.38283900 | 3.76815000  | -0.59221100 | C | -6.42927300 | 0.86244700  | -2.47082700 |
| C | -3.39585100 | -2.97755400 | 0.28327400  | H | -5.98062400 | 1.45426800  | -3.28209600 |
| H | -3.57899300 | -2.33100000 | -0.57502700 | H | -7.15877200 | 1.49354400  | -1.94302000 |
| C | -4.31320600 | -0.47207400 | -2.22790700 | H | -6.98105700 | 0.03544300  | -2.94251300 |
| C | -0.68783700 | -0.17174400 | -3.54582400 | C | 1.50520400  | 5.14976000  | -1.13825900 |
| H | -0.45797400 | 0.70517600  | -2.92450000 | H | 2.23082300  | 5.53019400  | -1.86072400 |
| C | 2.80420700  | -4.21170700 | -3.33289100 | C | 3.83089400  | 0.12636700  | -2.65110000 |
| H | 2.62908800  | -4.69527900 | -4.29511100 | H | 3.61766500  | -0.05240200 | -3.71685300 |
| C | -2.24290100 | -2.77143800 | 1.05121200  | H | 4.46640200  | 1.02221300  | -2.58192100 |
| C | -0.36402500 | 4.20664500  | 0.73962400  | H | 2.88032000  | 0.34047900  | -2.14193200 |
| C | 2.62209700  | -4.25025000 | -0.91034000 | C | -4.02714400 | -4.84223400 | 1.68338300  |
| C | -4.66314400 | -1.68925200 | -2.82191400 | H | -4.72235900 | -5.64543700 | 1.93153200  |
| H | -5.68850500 | -2.05195300 | -2.73101600 | C | 0.50073900  | 3.79742600  | -3.01374000 |
| C | -3.72548400 | -2.44962300 | -3.50914800 | H | -0.34783000 | 3.10899400  | -3.14944800 |
| H | -4.01059600 | -3.40715900 | -3.94676200 | C | 4.60712400  | -2.38111400 | 1.10723400  |
| C | 2.42178400  | -4.85059700 | -2.15638200 | H | 4.50807500  | -3.14053300 | 1.89807300  |
| H | 1.96603100  | -5.84021600 | -2.20607900 | H | 5.41768800  | -2.68551500 | 0.43189600  |
| C | 0.53963500  | 4.23324400  | -1.55487300 | C | -2.53583600 | 3.60271800  | -1.82076800 |
| C | -4.28343200 | -4.00146700 | 0.59808500  | H | -2.13837200 | 4.40344200  | -2.45576900 |
| H | -5.17576300 | -4.15003600 | -0.01301300 | H | -3.24421000 | 4.03800700  | -1.09753000 |
| C | 0.64579900  | 5.10159000  | 1.11324300  | C | -3.55570000 | 0.99238000  | 4.00212400  |
| H | 0.68874900  | 5.45315200  | 2.14621500  | H | -2.50717200 | 0.77554400  | 4.25276300  |
| C | 0.45206700  | -1.17478100 | -3.36098400 | H | -4.10193900 | 1.19097200  | 4.93478400  |
| H | 0.48903500  | -1.57524300 | -2.33645200 | H | -3.60051700 | 1.88792500  | 3.36875900  |
| H | 1.41543400  | -0.69300500 | -3.57687400 | C | 1.56490700  | 5.57605700  | 0.18624500  |
| H | 0.35783100  | -2.02790300 | -4.04945700 | H | 2.32889100  | 6.29289500  | 0.49283400  |
| C | -3.14075800 | 2.44571800  | -2.60245600 | C | 3.16073600  | 0.85515300  | 2.14129800  |
| H | -4.23597700 | 2.46743400  | -2.61732700 | C | 5.89867200  | -1.32019400 | -2.65936400 |
| H | -2.77635300 | 2.39078200  | -3.64203600 | H | 6.40452300  | -2.18738000 | -2.21101600 |
| C | -5.38108900 | 0.31830500  | -1.49065600 | H | 6.54094800  | -0.43676400 | -2.52954100 |
| H | -4.89091900 | 1.15419800  | -0.97090700 | H | 5.80687100  | -1.50836300 | -3.73895400 |
| C | 2.34186200  | -5.01613300 | 0.37072700  | C | -0.75212100 | 3.07501800  | 2.93485300  |
| H | 2.23554300  | -4.27806700 | 1.17972100  | H | -0.17894400 | 2.19671100  | 2.60125100  |
| C | -1.40965400 | 3.78183300  | 1.75059900  | H | -1.50955800 | 2.74567400  | 3.65866300  |
| H | -2.08960800 | 3.06645000  | 1.26950800  | H | -0.05556300 | 3.74541300  | 3.46080200  |
| C | -4.17768700 | -0.20747100 | 3.29860100  | C | 3.73776900  | 2.06341600  | 1.71158800  |
| C | -1.98113300 | -3.63181800 | 2.12516900  | C | -6.05923700 | -0.53516200 | -0.41794000 |
| H | -1.08364700 | -3.47913200 | 2.72748900  | H | -6.60740800 | -1.37930600 | -0.86338700 |
| C | -0.74799200 | 0.30981800  | -5.00258800 | H | -6.78460400 | 0.06893600  | 0.14482000  |
| H | -0.95402000 | -0.53101500 | -5.68172300 | H | -5.32556300 | -0.94107500 | 0.29187500  |
| H | 0.21236000  | 0.75825300  | -5.29745000 | C | 1.75310600  | -0.53913000 | 3.78680800  |
| H | -1.54046300 | 1.05779400  | -5.15343400 | H | 2.01696800  | -1.33896400 | 3.07844700  |
| C | -2.87167800 | -4.65729600 | 2.44130600  | C | 1.05582500  | -5.84119500 | 0.31913500  |
| H | -2.66357200 | -5.31238300 | 3.28858500  | H | 0.19520700  | -5.22734800 | 0.01829200  |

|   |             |             |             |                                          |             |             |             |
|---|-------------|-------------|-------------|------------------------------------------|-------------|-------------|-------------|
| H | 0.84361600  | -6.26591100 | 1.31081900  | H                                        | 1.88563100  | -1.90582100 | 5.47411700  |
| H | 1.14604400  | -6.68496500 | -0.38114300 | H                                        | 2.03393600  | -0.19444100 | 5.92586400  |
| C | 2.18196700  | 1.93314800  | 4.04412100  | C                                        | 4.10197200  | 3.16955100  | -0.52176800 |
| H | 1.57696500  | 1.89782000  | 4.95277800  | H                                        | 3.06399700  | 2.94679700  | -0.80754800 |
| C | -5.59261300 | 0.09870800  | 2.82776300  | H                                        | 4.72700600  | 3.17577300  | -1.42806500 |
| H | -5.59452000 | 0.91223900  | 2.09210500  | H                                        | 4.12219900  | 4.18447400  | -0.09720700 |
| H | -6.19305900 | 0.40502600  | 3.69612100  | C                                        | 6.07778900  | 2.43314600  | 0.86501700  |
| H | -6.05687800 | -0.79513700 | 2.39072000  | H                                        | 6.46348600  | 1.70886000  | 1.59730100  |
| C | 3.54547800  | -5.91384200 | 0.69475700  | H                                        | 6.16386500  | 3.43304300  | 1.31644000  |
| H | 3.68223200  | -6.67256900 | -0.09045000 | H                                        | 6.72636200  | 2.40921100  | -0.02300700 |
| H | 3.39158200  | -6.43643400 | 1.65013000  |                                          |             |             |             |
| H | 4.48009200  | -5.33740100 | 0.76154800  |                                          |             |             |             |
| C | 2.37444700  | 0.76254000  | 3.30610500  | <b>TS3</b> , E(solvation) = -3735.333758 |             |             |             |
| C | -4.16472500 | -1.43693900 | 4.19725200  | P                                        | -0.71467400 | -0.59244200 | -0.91361400 |
| H | -4.51154500 | -2.31519300 | 3.63341500  | P                                        | 1.15185100  | 0.91045400  | 0.26903600  |
| H | -4.82277900 | -1.28096400 | 5.06304600  | O                                        | -2.66252600 | -1.86492900 | 2.47221900  |
| H | -3.14483000 | -1.63854800 | 4.55461400  | N                                        | -2.29985300 | 2.40221200  | -1.50982900 |
| C | 4.80314000  | -0.97002700 | 1.67550700  | N                                        | 2.06921100  | -2.62074500 | -1.63114600 |
| H | 5.00449700  | -0.96815200 | 2.75504700  | N                                        | 3.25920200  | -1.67961300 | -0.01907800 |
| H | 5.60578400  | -0.40647100 | 1.17335800  | N                                        | -0.65034200 | 3.64268000  | -0.70675100 |
| C | 2.74317400  | 3.14134700  | 3.64149200  | C                                        | -0.36376400 | 1.21435200  | -0.56164400 |
| H | 2.58349200  | 4.04002800  | 4.23996300  | C                                        | -0.58567600 | -0.10551600 | 1.83564600  |
| C | 0.22354200  | -0.44270000 | 3.81070500  | C                                        | 2.06724800  | -1.63330200 | -0.69697500 |
| H | -0.10720000 | 0.32339000  | 4.52994800  | C                                        | -1.26465100 | -0.78024300 | 0.92519300  |
| H | -0.21815400 | -1.40376900 | 4.11489300  | O                                        | -2.84167300 | -2.43240600 | 0.29971100  |
| H | -0.18099700 | -0.18392900 | 2.82006300  | C                                        | 3.47208300  | -1.32984000 | 1.35315900  |
| C | -2.24277500 | 4.98177900  | 2.21423800  | C                                        | 1.35482300  | -2.00771300 | -3.89215200 |
| H | -1.62188600 | 5.71696400  | 2.74862400  | C                                        | 1.07515200  | -0.67557000 | -0.50747100 |
| H | -3.03647600 | 4.65049900  | 2.89966600  | C                                        | -1.09442500 | 2.37048600  | -0.87471300 |
| H | -2.71575300 | 5.49646800  | 1.36539500  | C                                        | 1.67379800  | 4.40265200  | -0.62585400 |
| C | 0.29211900  | 4.99277200  | -3.95017600 | C                                        | 1.19530200  | -2.81230000 | -2.74592800 |
| H | -0.59988100 | 5.57702200  | -3.68011300 | C                                        | -0.33582100 | 0.21043300  | 3.21737700  |
| H | 0.18122000  | 4.65141300  | -4.98949000 | C                                        | 4.21320200  | -0.17323700 | 1.65543100  |
| H | 1.15416900  | 5.67510100  | -3.91451600 | C                                        | 1.44554900  | 4.70549600  | 2.15572200  |
| C | 1.76118700  | 3.01819800  | -3.39918300 | H                                        | 1.38511700  | 4.81430800  | 3.23777900  |
| H | 2.66358200  | 3.63667800  | -3.27560700 | C                                        | -2.48930500 | 0.63776900  | -3.79488300 |
| H | 1.71053800  | 2.70380000  | -4.45233000 | H                                        | -1.54952500 | 1.10662500  | -3.46160500 |
| H | 1.87516700  | 2.12260000  | -2.77216000 | C                                        | 0.33067600  | -3.92244600 | -2.73050200 |
| C | 4.62328900  | 2.13983600  | 0.47888700  | C                                        | 1.85185300  | 4.18686600  | -2.11908600 |
| H | 4.58635100  | 1.16183500  | -0.02463300 | H                                        | 1.00244900  | 3.58395100  | -2.47881400 |
| C | 3.50689600  | 3.20676400  | 2.48117000  | C                                        | -3.26843000 | 1.33976400  | -1.47357900 |
| H | 3.94242200  | 4.15920800  | 2.17208800  | C                                        | -4.09050600 | 2.21871200  | 0.79739200  |
| C | 2.30265500  | -0.93803400 | 5.16093400  | H                                        | -3.19081100 | 2.84104400  | 0.69225300  |
| H | 3.39902200  | -1.02199300 | 5.14843200  | C                                        | 4.73816300  | 0.73606900  | 0.55935500  |
|   |             |             |             | H                                        | 4.12460400  | 0.55245600  | -0.33854200 |

|   |             |             |             |   |             |             |             |
|---|-------------|-------------|-------------|---|-------------|-------------|-------------|
| C | -4.12001300 | 1.23063000  | -0.35552500 | H | 3.68387800  | -3.59412200 | -2.56811800 |
| C | 2.71843700  | 4.95631800  | 0.12253300  | H | 3.05499100  | -4.42920200 | -1.12288600 |
| H | 3.64037700  | 5.25585600  | -0.37952800 | C | -2.72000700 | 3.78705500  | -1.74566600 |
| C | 0.35595800  | 4.19076200  | 1.45004200  | H | -3.48940700 | 4.08164400  | -1.01424800 |
| C | 0.48694900  | 4.06368800  | 0.04709700  | H | -3.13662700 | 3.90470300  | -2.75283600 |
| C | -3.36395200 | 0.45951500  | -2.56814200 | C | -5.05537900 | 0.19168400  | -0.34101100 |
| C | -4.30720600 | -0.56835800 | -2.50188200 | H | -5.72743800 | 0.08742800  | 0.51304400  |
| H | -4.38604000 | -1.27987500 | -3.32321200 | C | 2.24946300  | -0.78012100 | -3.91256300 |
| C | -0.20456600 | -3.46472500 | -5.05254700 | H | 2.80748600  | -0.74099900 | -2.96476500 |
| H | -0.74492200 | -3.72683700 | -5.96342100 | C | -1.10710200 | 0.55456300  | 5.49710000  |
| C | 0.64515000  | -2.36253600 | -5.04128600 | H | -1.92521100 | 0.59279900  | 6.21797000  |
| H | 0.75946500  | -1.76333800 | -5.94717100 | C | 3.40112100  | -1.94365000 | 3.67993800  |
| C | -5.32063200 | 3.13486500  | 0.76509400  | H | 3.10417400  | -2.62606800 | 4.47680300  |
| H | -5.42648500 | 3.65687800  | -0.19666200 | C | -3.98606100 | 1.51509200  | 2.15051500  |
| H | -5.26591800 | 3.88747300  | 1.56583200  | H | -4.93190300 | 1.02045100  | 2.42093100  |
| H | -6.23763500 | 2.54611800  | 0.91769400  | H | -3.75467400 | 2.24016600  | 2.94672100  |
| C | -2.34081200 | -1.78663500 | 1.18435200  | H | -3.19680800 | 0.75367700  | 2.12770600  |
| C | -0.37138700 | -4.22622900 | -3.90160500 | C | 0.20523100  | 0.78407300  | 5.91460300  |
| H | -1.04353200 | -5.08625400 | -3.91505200 | H | 0.41411900  | 1.01142400  | 6.96095400  |
| C | -1.41695700 | 4.55943100  | -1.55049600 | C | 4.13290500  | -0.80205600 | 3.99716400  |
| H | -0.89579200 | 4.72048800  | -2.50914400 | H | 4.40476500  | -0.60466200 | 5.03557200  |
| H | -1.54768800 | 5.53009300  | -1.05623800 | C | 1.86465500  | 5.52259200  | -2.87187500 |
| C | -0.93972700 | 3.82933100  | 2.16750200  | H | 0.96237400  | 6.11641000  | -2.66675700 |
| H | -1.28366700 | 2.85899500  | 1.76370700  | H | 1.93334300  | 5.35783200  | -3.95684900 |
| C | -3.65793300 | -2.81781200 | 2.95682000  | H | 2.73192000  | 6.12742500  | -2.56669300 |
| C | 0.98556000  | 0.43839600  | 3.65402300  | C | 0.18869100  | -4.81351400 | -1.50882500 |
| H | 1.80656900  | 0.39880700  | 2.93613000  | H | 0.71465200  | -4.31993500 | -0.67590000 |
| C | 3.06753600  | -2.24059500 | 2.35584300  | C | -2.02813200 | 4.87993500  | 1.90700200  |
| C | -5.14190900 | -0.70622400 | -1.39790200 | H | -1.70307800 | 5.86108600  | 2.28395300  |
| H | -5.86683700 | -1.52068900 | -1.36322500 | H | -2.95566200 | 4.60504000  | 2.43169900  |
| C | -3.16427500 | 1.58255300  | -4.79768600 | H | -2.26686800 | 4.98866000  | 0.84156700  |
| H | -4.11074300 | 1.14762400  | -5.15246600 | C | -2.13450000 | -0.68494700 | -4.46611200 |
| H | -2.51557100 | 1.74836400  | -5.67019400 | H | -1.69616800 | -1.39433800 | -3.74865700 |
| H | -3.39599000 | 2.55960600  | -4.35207400 | H | -1.40401700 | -0.51156300 | -5.26846700 |
| C | 4.19639300  | -2.59806200 | -0.67311200 | H | -3.01450900 | -1.15489200 | -4.93100400 |
| H | 4.73219000  | -3.18996600 | 0.08088200  | C | 1.24838400  | 0.71848200  | 4.99039000  |
| H | 4.93576400  | -2.03687100 | -1.26716500 | H | 2.27720900  | 0.89300200  | 5.30670000  |
| C | 4.52976500  | 0.07724800  | 2.99618700  | C | 6.19254300  | 0.37655300  | 0.22713100  |
| H | 5.11373600  | 0.96168800  | 3.25479900  | H | 6.83930300  | 0.56455800  | 1.09764100  |
| C | -1.38176500 | 0.26985000  | 4.16499600  | H | 6.56178000  | 0.98722300  | -0.60966000 |
| H | -2.40000000 | 0.05914700  | 3.85078500  | H | 6.30220900  | -0.68324900 | -0.04234000 |
| C | 2.60529400  | 5.11031600  | 1.49698700  | C | 3.12523400  | 3.38753300  | -2.41297900 |
| H | 3.43226500  | 5.53558200  | 2.06767000  | H | 4.02431800  | 3.93394900  | -2.09183500 |
| C | 3.27994100  | -3.44116700 | -1.55834700 | H | 3.22268500  | 3.20912900  | -3.49367200 |



|   |             |             |             |   |             |             |             |
|---|-------------|-------------|-------------|---|-------------|-------------|-------------|
| H | 2.64239700  | -3.84997400 | -3.15440300 | C | -0.14529700 | 2.39081300  | -3.76767200 |
| C | 3.32973500  | 1.16358800  | -4.73759900 | H | -0.46314300 | 2.83283700  | -2.81078500 |
| H | 3.80848800  | 0.71069600  | -5.60702800 | C | 1.14999100  | -1.82594900 | 5.42168100  |
| C | 1.97562900  | 1.48214800  | -4.77795800 | H | 1.50955000  | -2.65597800 | 6.03160100  |
| H | 1.40215500  | 1.27882000  | -5.68484500 | C | 0.43116200  | 3.65673000  | 3.90379000  |
| C | -1.14062800 | -6.15337900 | 1.02685200  | H | 1.19061400  | 3.62142400  | 4.68618500  |
| H | -1.40676600 | -6.65015300 | 0.08252100  | C | -0.53511000 | -3.96726400 | 2.14179000  |
| H | -1.94453900 | -6.33752100 | 1.75424300  | H | 0.45388200  | -4.32013600 | 2.47309800  |
| H | -0.22990700 | -6.63470600 | 1.41232700  | H | -1.26033500 | -4.18947600 | 2.93985600  |
| C | 2.81394000  | -1.75458800 | 0.47225000  | H | -0.48193500 | -2.87688400 | 2.01515600  |
| C | 4.07317400  | 1.42290400  | -3.59203900 | C | 0.53608200  | -0.72814800 | 6.02876200  |
| H | 5.13596600  | 1.17548100  | -3.57026100 | H | 0.41174000  | -0.70454400 | 7.11235100  |
| C | -3.85297000 | -3.08519100 | -1.18178000 | C | -0.91376600 | 3.73357300  | 4.25627200  |
| H | -4.75277200 | -2.99122800 | -1.80214000 | H | -1.19907400 | 3.76095400  | 5.30941800  |
| H | -4.12718600 | -3.60915400 | -0.24846100 | C | -5.75456600 | -0.29281800 | -3.26113600 |
| C | -3.51292000 | -1.93737600 | 2.05463000  | H | -5.88016300 | -1.36592200 | -3.05852800 |
| H | -2.79383800 | -2.44850700 | 1.39745900  | H | -5.54575000 | -0.16846200 | -4.33347800 |
| C | 4.59028700  | -2.79720300 | 1.78838200  | H | -6.71389400 | 0.20014500  | -3.04217100 |
| C | 0.22142700  | 0.30159500  | 3.86822900  | C | 4.33661700  | 2.37710800  | -1.26704800 |
| H | -0.16218800 | 1.11387700  | 3.24639800  | H | 3.66014400  | 2.70672700  | -0.46293700 |
| C | 0.82031500  | 3.62052700  | 2.56192900  | C | -4.37517800 | -3.00710700 | 2.73171700  |
| C | 2.24913100  | -4.76374900 | -1.25148500 | H | -5.07827400 | -2.55455700 | 3.44680500  |
| H | 3.22556200  | -5.24681500 | -1.20762900 | H | -3.74216800 | -3.71216500 | 3.29043900  |
| C | -0.29621200 | -3.57195500 | -4.73322700 | H | -4.96707500 | -3.57790500 | 2.00105800  |
| H | 0.48215000  | -4.27970800 | -5.05612900 | C | 1.43075200  | -1.80088300 | -4.29179900 |
| H | -0.65059100 | -3.02686200 | -5.62043700 | H | 1.90889700  | -1.15721900 | -3.53945700 |
| H | -1.13132000 | -4.16408900 | -4.33340300 | H | 1.05976200  | -1.16611400 | -5.10914800 |
| C | 0.64372300  | 4.93858600  | -0.40059800 | H | 2.19590800  | -2.46426500 | -4.72275100 |
| H | 1.00543100  | 5.62072400  | 0.38022500  | C | 0.07901800  | 0.33744800  | 5.25012700  |
| H | -0.19572400 | 5.42217400  | -0.92472400 | H | -0.40509900 | 1.19488500  | 5.71993900  |
| C | -1.89411500 | 3.81019300  | 3.27223200  | C | -2.83709700 | 5.59261200  | 0.75037500  |
| H | -2.94107700 | 3.90946000  | 3.56179100  | H | -3.25125600 | 5.98255900  | 1.69241400  |
| C | 1.31750100  | -1.86203800 | 4.04135100  | H | -3.55004200 | 5.81956400  | -0.05563400 |
| H | 1.81554600  | -2.69825100 | 3.55463400  | H | -1.90278600 | 6.13712200  | 0.55117400  |
| C | -6.10811700 | 0.67580900  | 1.08314100  | C | -4.45126000 | 1.80260500  | -2.73873500 |
| H | -6.88995100 | 1.25662400  | 1.57486500  | H | -5.36871800 | 2.37381600  | -2.53370900 |
| C | 1.74510300  | 4.49074800  | -1.36423500 | H | -4.21961500 | 1.93624200  | -3.80570200 |
| H | 1.64326800  | 4.93067600  | -2.36516800 | H | -3.63452300 | 2.24154900  | -2.14407500 |
| H | 2.75949700  | 4.70790700  | -0.99253900 | C | -0.97177000 | 1.11809200  | -3.97879100 |
| C | -2.68768400 | -3.74882700 | -1.90883400 | H | -0.73286400 | 0.64861500  | -4.94593100 |
| H | -2.55700600 | -4.80807900 | -1.65072900 | H | -2.04586000 | 1.35099100  | -3.97379200 |
| H | -2.78637800 | -3.66112300 | -3.00266000 | H | -0.77129100 | 0.38032500  | -3.18714900 |
| C | 1.33648600  | -4.94734200 | -0.21851000 | C | 2.29616800  | 3.55207800  | 2.19395400  |
| H | 1.59959200  | -5.58238600 | 0.63026800  | H | 2.40547600  | 3.93434400  | 1.16706000  |

|                                          |             |             |             |   |             |             |             |
|------------------------------------------|-------------|-------------|-------------|---|-------------|-------------|-------------|
| C                                        | -3.92246200 | 3.34960000  | 1.11201900  | O | -4.55108400 | 0.07709700  | 1.06773600  |
| H                                        | -3.76795600 | 2.27120000  | 1.25753800  | N | -0.07997500 | 3.42801200  | -0.88912600 |
| H                                        | -4.59808900 | 3.48077900  | 0.25389000  | N | -0.11546800 | -3.27622900 | -1.59430800 |
| H                                        | -4.44103900 | 3.74836800  | 1.99730500  | N | 1.68546900  | -3.32906100 | -0.32285200 |
| C                                        | 3.16755900  | 4.43341500  | 3.09175100  | N | 2.09931300  | 3.14084900  | -0.68034000 |
| H                                        | 2.77839100  | 5.45953900  | 3.15592900  | C | 0.65170400  | 1.16750000  | -0.31358700 |
| H                                        | 4.19126100  | 4.47523700  | 2.69324000  | C | -1.73504100 | 0.08213000  | 1.95511700  |
| H                                        | 3.23479300  | 4.02910000  | 4.11208900  | C | 0.65017200  | -2.55042800 | -0.74664800 |
| C                                        | 5.29126600  | 3.52977800  | -1.60371200 | C | -2.26319900 | 0.03179700  | 0.83185900  |
| H                                        | 6.02257000  | 3.21313200  | -2.36266100 | O | -3.75269500 | -0.45277700 | -0.97444800 |
| H                                        | 5.85001700  | 3.84301700  | -0.70942100 | C | 2.45590000  | -3.09093200 | 0.85622700  |
| H                                        | 4.76009000  | 4.40438100  | -2.00680100 | C | -1.37250900 | -2.11822900 | -3.35370200 |
| C                                        | -2.69584400 | -1.14705100 | 3.08112700  | C | 0.49777200  | -1.18285200 | -0.42338900 |
| H                                        | -2.07332300 | -0.39126300 | 2.58006800  | C | 0.89327700  | 2.52763900  | -0.59454900 |
| H                                        | -2.02769900 | -1.81013600 | 3.65205600  | C | 4.23767000  | 2.44950500  | -1.61677600 |
| H                                        | -3.35082200 | -0.62803400 | 3.79785800  | C | -1.36823100 | -2.90277000 | -2.18237700 |
| C                                        | 2.80425800  | 2.10633800  | 2.19246500  | C | -1.18238600 | 0.17730000  | 3.26714200  |
| H                                        | 2.69415400  | 1.65695000  | 3.19191400  | C | 3.74936900  | -2.55029500 | 0.74379300  |
| H                                        | 3.86932500  | 2.07333900  | 1.91628500  | C | 5.28887000  | 2.20565600  | 0.97671900  |
| H                                        | 2.24374200  | 1.48266700  | 1.48034700  | H | 5.70863700  | 2.10670800  | 1.97898100  |
| C                                        | 5.11044200  | 1.17087800  | -0.73484400 | C | -2.25144600 | 2.81070800  | -2.69573700 |
| H                                        | 4.43584800  | 0.33288600  | -0.51886800 | H | -1.19891000 | 2.51332300  | -2.83901900 |
| H                                        | 5.65565900  | 1.44102700  | 0.18219500  | C | -2.55086200 | -3.42510700 | -1.62548100 |
| H                                        | 5.85442100  | 0.81871300  | -1.46558700 | C | 3.64215200  | 2.48825200  | -3.01490500 |
| C                                        | 5.57550700  | -1.66203900 | 1.52563600  | H | 2.86426500  | 3.26832200  | -3.03289300 |
| H                                        | 5.62016900  | -1.41078200 | 0.45944500  | C | -1.40437500 | 3.34936500  | -0.35435600 |
| H                                        | 6.57760700  | -1.96898500 | 1.85595900  | C | -0.47844300 | 4.25982000  | 1.86430700  |
| H                                        | 5.28186900  | -0.76861300 | 2.09695900  | H | 0.46815000  | 4.18432800  | 1.30892200  |
| C                                        | -0.42493200 | 3.41907600  | -4.86865100 | C | 4.39667600  | -2.37072100 | -0.61710200 |
| H                                        | 0.15381900  | 4.34144700  | -4.71579800 | H | 3.58253400  | -2.30183800 | -1.35832500 |
| H                                        | -1.49306500 | 3.68069900  | -4.88727700 | C | -1.59346800 | 3.68606500  | 1.00078300  |
| H                                        | -0.16038600 | 3.02023500  | -5.85914700 | C | 5.59337400  | 2.18315100  | -1.41613100 |
| C                                        | 4.62699800  | -3.20775200 | 3.25483700  | H | 6.25344000  | 2.05703200  | -2.27412400 |
| H                                        | 4.39291700  | -2.34955400 | 3.90067400  | C | 3.92774700  | 2.49816800  | 0.82917500  |
| H                                        | 5.62565000  | -3.58419200 | 3.51427600  | C | 3.42281100  | 2.63043200  | -0.47781700 |
| H                                        | 3.89566700  | -4.00622500 | 3.44817800  | C | -2.46704700 | 2.99339100  | -1.20262800 |
| C                                        | 4.85607900  | -3.99648400 | 0.88726500  | C | -3.74322200 | 2.91820100  | -0.64020200 |
| H                                        | 4.11566400  | -4.78594100 | 1.08067700  | H | -4.58659300 | 2.64196900  | -1.27204100 |
| H                                        | 5.85497600  | -4.39886000 | 1.10796200  | C | -3.78113100 | -2.41065400 | -3.45155100 |
| H                                        | 4.81232100  | -3.70787200 | -0.16945500 | H | -4.72938500 | -2.21963500 | -3.95578600 |
|                                          |             |             |             | C | -2.60421100 | -1.87021100 | -3.96257500 |
|                                          |             |             |             | H | -2.64741300 | -1.25799800 | -4.86327400 |
| <b>TS4</b> , E(solvation) = -3735.332688 |             |             |             | C | -0.73650800 | 5.74863900  | 2.13313200  |
| P                                        | -0.67853900 | 0.10211500  | -0.92469800 | H | -0.88258600 | 6.31386300  | 1.20100400  |
| P                                        | 1.76196900  | -0.10164600 | 0.18276000  |   |             |             |             |

|   |             |             |             |   |             |             |             |
|---|-------------|-------------|-------------|---|-------------|-------------|-------------|
| H | 0.10795600  | 6.19256400  | 2.68088600  | H | -1.20049300 | 3.49890500  | 3.78296600  |
| H | -1.64234800 | 5.88158200  | 2.74355000  | H | 0.50641800  | 3.97723900  | 3.77584500  |
| C | -3.58873500 | -0.14261200 | 0.17400800  | H | 0.00388000  | 2.45525300  | 2.99437800  |
| C | -3.75179000 | -3.18284700 | -2.29893300 | C | -0.19699400 | 0.44298900  | 5.87065900  |
| H | -4.68130400 | -3.59819000 | -1.90414100 | H | 0.18881600  | 0.54822000  | 6.88560600  |
| C | 1.94727100  | 4.58336300  | -0.90730800 | C | 3.83629400  | -2.45232900 | 3.16527900  |
| H | 2.66352500  | 4.92651000  | -1.66506500 | H | 4.37208300  | -2.17830400 | 4.07581600  |
| H | 2.14545500  | 5.13507200  | 0.02590400  | C | 4.66076700  | 2.82801300  | -4.10185700 |
| C | 3.06907600  | 2.73130100  | 2.06108700  | H | 5.22682300  | 3.73899600  | -3.86102800 |
| H | 2.01244900  | 2.67172000  | 1.75873200  | H | 4.14646900  | 2.98593100  | -5.05977600 |
| C | -5.96843800 | -0.10556300 | 0.75945100  | H | 5.37833900  | 2.00761600  | -4.25103600 |
| C | 0.12947800  | -0.22827400 | 3.57086600  | C | -2.56213300 | -4.26637600 | -0.35811400 |
| H | 0.76296400  | -0.64744500 | 2.78674900  | H | -1.56238800 | -4.21228300 | 0.09868600  |
| C | 1.88205800  | -3.41846900 | 2.10004800  | C | 3.33086300  | 4.13069800  | 2.63386900  |
| C | -3.94785900 | 3.19014700  | 0.71011300  | H | 4.38682400  | 4.23143300  | 2.92730100  |
| H | -4.95008300 | 3.11692700  | 1.13548200  | H | 2.71418600  | 4.30750800  | 3.52676200  |
| C | -2.47115100 | 4.15475300  | -3.40575500 | H | 3.11539200  | 4.92396500  | 1.90365200  |
| H | -3.52122700 | 4.46859400  | -3.30471500 | C | -3.13298000 | 1.72806800  | -3.31739400 |
| H | -2.24250800 | 4.06946000  | -4.47810600 | H | -3.00544100 | 0.75989300  | -2.81245300 |
| H | -1.84758700 | 4.95387500  | -2.97967800 | H | -2.87728600 | 1.61123000  | -4.38127300 |
| C | 1.76017200  | -4.57124400 | -1.08834200 | H | -4.19827900 | 2.00335600  | -3.27444000 |
| H | 2.00215900  | -5.41501200 | -0.42828400 | C | 0.61217600  | -0.09672000 | 4.86854700  |
| H | 2.53920600  | -4.49628800 | -1.86557400 | H | 1.63159800  | -0.41435700 | 5.09511800  |
| C | 4.42626600  | -2.22952300 | 1.92290700  | C | 5.25269600  | -3.60118200 | -0.94871000 |
| H | 5.42260300  | -1.78843100 | 1.87101100  | H | 6.08890000  | -3.68245700 | -0.23787900 |
| C | -1.99747100 | 0.71002300  | 4.28423900  | H | 5.67284400  | -3.52126200 | -1.96192300 |
| H | -3.01587300 | 1.01437100  | 4.03684100  | H | 4.67490000  | -4.53434000 | -0.88363700 |
| C | 6.11785300  | 2.07471800  | -0.13024000 | C | 2.95151200  | 1.15189300  | -3.32528600 |
| H | 7.18148000  | 1.87366300  | 0.00664000  | H | 3.66737200  | 0.32138400  | -3.21988700 |
| C | 0.35883100  | -4.66131100 | -1.69011400 | H | 2.57639000  | 1.15310100  | -4.35881100 |
| H | 0.35580900  | -4.99442200 | -2.73543500 | H | 2.10309700  | 0.95972500  | -2.65041300 |
| H | -0.29499100 | -5.33256800 | -1.11294500 | C | -0.25211700 | -0.29915600 | -4.72803500 |
| C | 0.49256000  | 4.68926500  | -1.36273800 | H | -0.87322200 | -0.42135900 | -5.62769900 |
| H | -0.03980400 | 5.53957400  | -0.91758100 | H | 0.72594800  | 0.07315900  | -5.06109700 |
| H | 0.41011300  | 4.75720200  | -2.45965200 | H | -0.71726300 | 0.46284800  | -4.08470400 |
| C | -2.88664200 | 3.58100300  | 1.51975500  | C | 0.57335100  | -4.18753600 | 2.19864800  |
| H | -3.06948500 | 3.83007400  | 2.56722300  | H | 0.34897400  | -4.58192900 | 1.19517800  |
| C | -0.07720700 | -1.61755600 | -3.97603100 | C | 5.22152900  | -1.09180000 | -0.72303800 |
| H | 0.64002400  | -1.43448700 | -3.16040800 | H | 4.62815000  | -0.21425700 | -0.43177500 |
| C | -1.50203500 | 0.84278100  | 5.57681000  | H | 5.56919900  | -0.94692600 | -1.75691600 |
| H | -2.13642700 | 1.25726100  | 6.36125800  | H | 6.11731700  | -1.12827800 | -0.08423400 |
| C | 2.58611600  | -3.05982000 | 3.25406900  | C | 0.70357200  | -5.39217700 | 3.13596000  |
| H | 2.15885300  | -3.27843000 | 4.23497200  | H | 1.56105300  | -6.02412700 | 2.86454500  |
| C | -0.28279800 | 3.50029900  | 3.17626600  | H | -0.20792500 | -6.00538000 | 3.09009900  |







|   |             |             |             |   |             |             |             |
|---|-------------|-------------|-------------|---|-------------|-------------|-------------|
| C | -1.19020400 | -0.26380600 | 0.00010600  | C | -1.81501700 | -1.58450000 | -0.86987700 |
| C | 0.00786900  | -0.44823300 | 0.00008100  | N | -1.56487200 | -2.87283700 | -1.15147400 |
| O | 1.88906200  | -1.85069100 | 0.00067300  | C | -2.21534900 | 2.61487800  | 1.55278200  |
| C | -2.60951400 | -0.04947400 | 0.00007100  | C | -5.14572200 | 1.79878000  | -1.60932500 |
| C | 1.44088300  | -0.73599600 | 0.00019400  | H | -6.13266900 | 2.11689500  | -1.26680000 |
| C | 3.60078900  | 0.37387300  | -0.00013900 | C | 3.19715700  | -0.90889500 | 2.01601000  |
| C | -3.48675300 | -1.14601900 | -0.00029400 | C | -4.67807000 | 0.52936500  | -1.25786200 |
| H | -3.07556300 | -2.15593700 | -0.00049200 | C | -1.27228600 | 1.57582300  | 0.99820900  |
| C | -3.12940600 | 1.25492500  | 0.00034300  | C | 1.51517100  | -4.88230600 | -1.48154700 |
| H | -2.44229600 | 2.10162700  | 0.00063500  | H | 2.25130300  | -5.14310300 | -2.24541900 |
| C | -4.50610300 | 1.45500000  | 0.00024700  | C | 2.41775700  | -0.93556800 | 3.18650000  |
| H | -4.90575200 | 2.46990400  | 0.00044600  | C | -2.75912500 | -0.33556400 | 1.62963100  |
| C | -5.37333900 | 0.36176600  | -0.00013700 | C | 0.36545600  | -3.44478300 | -3.21130400 |
| H | -6.45243200 | 0.52236100  | -0.00022200 | H | -0.52270300 | -2.79524200 | -3.25284700 |
| C | -4.86200700 | -0.93660100 | -0.00040600 | C | -0.39143100 | -4.26890400 | 0.49488900  |
| H | -5.53967600 | -1.79127900 | -0.00070000 | C | -3.41071800 | 0.13803300  | -1.72996900 |
| C | 4.11424800  | -0.30628000 | -1.26623400 | C | -3.51916100 | -2.28484600 | -2.28001200 |
| H | 3.86980600  | -1.37466600 | -1.27095500 | H | -3.37349600 | -2.04225400 | -3.34580200 |
| H | 5.20604900  | -0.19089500 | -1.32055100 | H | -4.59380400 | -2.40031600 | -2.09343200 |
| H | 3.67234000  | 0.16898300  | -2.15381000 | C | 0.68695100  | -5.11585100 | 0.77275400  |
| C | 3.96202700  | 1.85337200  | -0.00046200 | H | 0.76909100  | -5.56420500 | 1.76511100  |
| H | 3.54894900  | 2.34485100  | -0.89195000 | C | -3.13771700 | 2.24330700  | -2.85900200 |
| H | 5.05377800  | 1.97498600  | -0.00088200 | H | -2.55481400 | 2.90969100  | -3.49757100 |
| H | 3.54959200  | 2.34519400  | 0.89113700  | C | -2.70276800 | -3.49396000 | -1.83323300 |
| C | 4.11390500  | -0.30560400 | 1.26646000  | H | -3.24330600 | -4.12931200 | -1.11279400 |
| H | 3.67089200  | 0.16944700  | 2.15360400  | H | -2.35772500 | -4.12243400 | -2.66456300 |
| H | 5.20554500  | -0.18907800 | 1.32155600  | C | 3.77623500  | -2.06348200 | 1.45818200  |
| H | 3.87048200  | -1.37420900 | 1.27129500  | C | -1.69593000 | 0.26024400  | 0.78134600  |

**3d<sup>+</sup>**, E = -3689.3149226

|   |             |             |             |   |             |             |             |
|---|-------------|-------------|-------------|---|-------------|-------------|-------------|
| P | 0.73614200  | -0.73864500 | -0.25861700 | C | 2.30604600  | 5.05153500  | -1.94532700 |
| P | 0.30312600  | 2.24565700  | 0.75637600  | H | 1.98694200  | 6.08998400  | -1.84761000 |
| C | 2.68334900  | 1.06390500  | 0.59671500  | C | 1.62838200  | -5.42264400 | -0.20300000 |
| N | -2.96139900 | -1.20070700 | -1.46595200 | H | 2.44917100  | -6.10468800 | 0.02729500  |
| O | -3.23667300 | -1.43771000 | 1.45945400  | C | -3.94480500 | -0.09851400 | 3.67706100  |
| N | 3.48722700  | 0.34473700  | 1.38803300  | H | -3.34817400 | -0.73118000 | 4.35308600  |
| O | -3.39791800 | 2.57966000  | 0.93980300  | H | -4.69418600 | -0.73732900 | 3.19240000  |
| O | -1.90365100 | 3.42991300  | 2.37952500  | C | 4.77616900  | 1.01336500  | 1.60415700  |
| N | 3.30858600  | 2.19419600  | 0.20901200  | H | 5.58650100  | 0.44969500  | 1.11567900  |
| C | 1.28105200  | 0.79133500  | 0.35100900  | H | 4.98491300  | 1.05733800  | 2.68102600  |
| C | -5.56505000 | -0.38239700 | -0.42743800 | C | 3.54512800  | -3.28095500 | 2.10210400  |
| H | -4.97135700 | -1.25955200 | -0.13624700 | H | 3.97822300  | -4.19599000 | 1.69275000  |
| O | -3.06211200 | 0.42846900  | 2.68229900  | C | 4.53704500  | 2.39890700  | 0.98898100  |
| C | -0.45276100 | -3.69724500 | -0.78693400 | H | 4.36557200  | 3.16492800  | 1.76033600  |

|   |             |             |             |   |             |             |             |
|---|-------------|-------------|-------------|---|-------------|-------------|-------------|
| H | 5.35220100  | 2.73847100  | 0.33832800  | H | -5.18044300 | 0.71066600  | 5.24181400  |
| C | -2.64294500 | 0.96831300  | -2.57255000 | H | -5.20965400 | 1.64864700  | 3.72798700  |
| C | 2.58129800  | 4.30691800  | -0.79337000 | H | -3.78765700 | 1.73672700  | 4.80127300  |
| C | 3.15411100  | 2.37909500  | -2.23342100 | C | 0.28063400  | 0.20623400  | 3.86883900  |
| C | 2.77434100  | -3.33815600 | 3.25947700  | H | -0.13744100 | -0.07271000 | 2.89150500  |
| H | 2.60825800  | -4.29643100 | 3.75499500  | H | -0.16485400 | 1.17017500  | 4.15723900  |
| C | 1.21922600  | 5.80366400  | 0.74634900  | H | -0.02998300 | -0.55331700 | 4.60384400  |
| H | 1.22202600  | 6.68718400  | 0.09136500  | C | 3.52961800  | 0.40836100  | -3.83023400 |
| H | 1.15091200  | 6.16470000  | 1.78214900  | H | 2.49067700  | 0.45571700  | -4.18277000 |
| H | 0.31904500  | 5.21100400  | 0.53388000  | H | 3.84399400  | -0.64464700 | -3.84979500 |
| C | -4.07527700 | 4.90458200  | 0.68378000  | H | 4.15975700  | 0.95232600  | -4.54936200 |
| H | -3.11531700 | 5.30883500  | 1.02997500  | C | 2.49072300  | 4.96991700  | 0.57129100  |
| H | -4.86624200 | 5.62130400  | 0.94358000  | H | 2.45833700  | 4.17289200  | 1.32949000  |
| H | -4.04651000 | 4.79361900  | -0.40873600 | C | 5.19494700  | 0.89926100  | -2.06076700 |
| C | 0.47924800  | -4.00319600 | -1.79964000 | H | 5.76501400  | 1.58635600  | -2.70348400 |
| C | 2.21847400  | -2.17905000 | 3.79281200  | H | 5.58244300  | -0.11788400 | -2.22190200 |
| H | 1.61547400  | -2.23831200 | 4.70139600  | H | 5.39711700  | 1.17036100  | -1.01807000 |
| C | 1.56896900  | -2.57407100 | -3.58396100 | C | -1.59376800 | 0.30865700  | -4.75659500 |
| H | 1.68269100  | -1.73184200 | -2.88489800 | H | -2.39549900 | -0.41945500 | -4.94819100 |
| H | 1.44597700  | -2.16754100 | -4.59917200 | H | -0.67422300 | -0.05435200 | -5.24029400 |
| H | 2.50192700  | -3.15895600 | -3.56800200 | H | -1.88165500 | 1.25314400  | -5.24178900 |
| C | -4.37842300 | 2.65775900  | -2.38622600 | C | 2.43247900  | 4.48745300  | -3.20712700 |
| H | -4.75842800 | 3.64672600  | -2.64768700 | H | 2.21074100  | 5.08177200  | -4.09464600 |
| C | -0.91560400 | -3.23938500 | 2.73000900  | C | 1.80732600  | 0.31349500  | 3.79884500  |
| H | -0.16752300 | -3.82834700 | 3.28389800  | H | 2.04252500  | 1.16890800  | 3.14688400  |
| H | -1.73306100 | -2.98060300 | 3.41928900  | C | 0.17328800  | -4.57114400 | -4.23344900 |
| H | -0.43097500 | -2.30730700 | 2.40171800  | H | 1.06326900  | -5.21631900 | -4.27794300 |
| C | -1.36139800 | 0.51628400  | -3.25442000 | H | 0.01104300  | -4.15618400 | -5.23862400 |
| H | -1.05588100 | -0.45391900 | -2.83811600 | H | -0.68426100 | -5.21133300 | -3.97955800 |
| C | -6.01376000 | 0.30641800  | 0.86535800  | C | -6.78619700 | -0.84213500 | -1.23420000 |
| H | -5.15942800 | 0.75645100  | 1.39041800  | H | -7.42031300 | 0.01671700  | -1.50123500 |
| H | -6.50602600 | -0.41642700 | 1.53270500  | H | -7.39741100 | -1.54030200 | -0.64397100 |
| H | -6.74219000 | 1.10577100  | 0.65669100  | H | -6.50251200 | -1.33945800 | -2.17331900 |
| C | 2.85461000  | 3.16725300  | -3.34700600 | C | 3.73491200  | 5.83566900  | 0.81679100  |
| H | 2.95694200  | 2.75049200  | -4.34810100 | H | 4.66757400  | 5.26369900  | 0.70517900  |
| C | -1.46372300 | -4.02755900 | 1.53924800  | H | 3.71122900  | 6.26935500  | 1.82706300  |
| H | -2.25169400 | -3.41139500 | 1.09046400  | H | 3.77177300  | 6.66419700  | 0.09358000  |
| C | -2.10095200 | -5.34420800 | 1.99509500  | C | 6.11048100  | -2.33794000 | 0.56033900  |
| H | -2.50147000 | -5.91394900 | 1.14395900  | H | 6.50128300  | -1.69905800 | 1.36596000  |
| H | -2.92658600 | -5.14134700 | 2.69206100  | H | 6.75311400  | -2.21520100 | -0.32402800 |
| H | -1.37466900 | -5.98616200 | 2.51606200  | H | 6.19895900  | -3.38172400 | 0.89745200  |
| C | 4.65423400  | -2.00198500 | 0.21924100  | C | 3.70207700  | 0.96401700  | -2.41544900 |
| H | 4.62296800  | -0.97320400 | -0.16666800 | H | 3.15186100  | 0.28842900  | -1.73569900 |
| C | -4.56605600 | 1.06996500  | 4.40579800  | C | 4.12858700  | -2.90075600 | -0.89866800 |

|   |             |             |             |   |             |             |             |
|---|-------------|-------------|-------------|---|-------------|-------------|-------------|
| H | 4.17874700  | -3.96297200 | -0.61501600 | C | -4.07436400 | 2.43326400  | 0.89669300  |
| H | 4.73309200  | -2.76965500 | -1.81001000 | H | -5.15698300 | 2.43921400  | 0.74585000  |
| H | 3.07998800  | -2.66682600 | -1.13110700 | H | -3.66253400 | 3.40378400  | 0.57096500  |
| C | 2.40858800  | 0.60203500  | 5.17849100  | C | -2.10337800 | -0.49282900 | 3.76238400  |
| H | 2.18926400  | -0.21553300 | 5.88134200  | C | -5.19409900 | 0.44880900  | -1.32462300 |
| H | 1.98290400  | 1.52622900  | 5.59440000  | C | 5.01990700  | -1.79564700 | 0.04112100  |
| H | 3.50137700  | 0.71512500  | 5.12897000  | C | -0.53838400 | 1.28777500  | 5.26157700  |
| C | -4.35315100 | 3.56766700  | 1.34072100  | H | 0.05390500  | 1.98148300  | 5.86117800  |
| H | -4.33365000 | 3.65372700  | 2.43651400  | C | -3.20011800 | 1.48134700  | -2.33698800 |
| H | -5.32148000 | 3.15750900  | 1.02647000  | C | 5.40626900  | -2.98597300 | 0.66232300  |
| C | -0.21028500 | 1.49537100  | -3.01478400 | H | 5.96075000  | -3.73212900 | 0.08998100  |
| H | -0.35224600 | 2.43353400  | -3.57295600 | C | 3.99156800  | -1.07641300 | 2.16212200  |
| H | 0.74023800  | 1.05679900  | -3.34942200 | C | 1.62843200  | 4.19297300  | -1.12637000 |
| H | -0.10844100 | 1.75301700  | -1.95114900 | C | -1.93567200 | 2.30693700  | -2.24269700 |

**7<sup>+</sup>**, E= -4136.9952281

|    |             |             |             |   |             |             |             |
|----|-------------|-------------|-------------|---|-------------|-------------|-------------|
| P  | 0.20181200  | 1.14242500  | 0.50838200  | H | -3.42325900 | 2.94423500  | 2.93517000  |
| P  | 1.67144500  | -1.40575300 | -0.82016100 | H | -4.39847800 | 1.44715600  | 2.83486800  |
| Si | 1.04144300  | -4.42241800 | 0.45514200  | C | 2.66624000  | 2.64171100  | -2.72511500 |
| O  | -1.09227700 | -2.00174500 | -3.00397400 | C | 5.40925500  | -1.54398700 | -1.40666200 |
| O  | -3.63532000 | -1.44996400 | 0.06866300  | H | 4.87633000  | -0.64258300 | -1.74232900 |
| O  | -2.46370200 | -3.12442100 | -0.82339100 | C | 5.09420500  | 1.42133900  | 0.08626200  |
| O  | 0.22565300  | -3.70516100 | -2.39816700 | H | 5.63249100  | 1.27240900  | -0.86562900 |
| N  | -2.44665900 | 1.27288600  | 2.07695200  | H | 5.80716900  | 1.31952500  | 0.91411900  |
| N  | 4.02273000  | 0.42932000  | 0.22978700  | C | 1.32407000  | 4.63451400  | 0.29180300  |
| N  | -3.43652000 | 1.36910700  | 0.11006200  | H | 1.54465600  | 3.78266600  | 0.94866100  |
| N  | 2.96119100  | 2.31174200  | -0.29647400 | C | 4.38922200  | -2.28982900 | 2.73152100  |
| C  | -1.24082400 | 0.10262900  | 0.25642800  | H | 4.14931800  | -2.49188900 | 3.77760900  |
| C  | -1.31273100 | -1.12230800 | -0.37925700 | C | -0.81271700 | 0.01809800  | 5.75792200  |
| C  | -2.42136400 | 0.83751600  | 0.80474100  | H | -0.43937500 | -0.27960000 | 6.73864700  |
| C  | 0.68570000  | -2.55784400 | 0.23468000  | C | 5.09385100  | -3.23544000 | 1.99472000  |
| H  | 0.43511100  | -2.10860600 | 1.20272600  | H | 5.40104300  | -4.17249400 | 2.46127600  |
| C  | -2.59000600 | -1.88167600 | -0.36334100 | C | -0.51610000 | -5.43356100 | 0.16005900  |
| C  | -1.77489900 | 0.78278000  | 3.25818200  | H | -1.34899500 | -5.04432100 | 0.76589900  |
| C  | -0.14015600 | -1.90422200 | -0.86033300 | H | -0.33893300 | -6.47978000 | 0.45378000  |
| C  | -0.98982200 | 1.68971500  | 4.00221300  | H | -0.80371500 | -5.40498000 | -0.89927700 |
| C  | 2.81304300  | 0.96759500  | -0.06079800 | C | 0.89916600  | 3.26769900  | 3.51053100  |
| C  | -3.92681400 | 1.07132800  | -1.21095000 | H | 1.30429000  | 3.20588400  | 4.53158500  |
| C  | 4.31241600  | -0.84933200 | 0.81061600  | H | 1.16241300  | 4.25936500  | 3.11387900  |
| C  | 1.58370700  | 0.26037200  | -0.09538200 | H | 1.39355200  | 2.50036900  | 2.89523400  |
| C  | -0.32384300 | -2.66574000 | -2.13833100 | C | 3.25282400  | -0.06469800 | 3.01874600  |
| C  | -0.62242500 | 3.07884900  | 3.50918400  | H | 3.04807700  | 0.82735800  | 2.40848300  |
| H  | -0.96765200 | 3.17437700  | 2.46853800  | C | -3.06737300 | -1.44130000 | 3.07649800  |
| C  | 2.36524900  | 3.02524400  | -1.39950900 | H | -3.43537100 | -0.97201700 | 2.15812600  |

|   |             |             |             |   |             |             |             |
|---|-------------|-------------|-------------|---|-------------|-------------|-------------|
| C | 1.22083400  | 4.98765200  | -2.20237200 | H | 7.19023700  | -1.02177000 | -2.55116700 |
| H | 0.66688600  | 5.90795800  | -2.00705100 | H | 7.48466500  | -2.18409100 | -1.23868000 |
| C | 4.31021900  | 2.73098900  | 0.12369600  | C | 1.52018900  | 4.63430000  | -3.51365300 |
| H | 4.27163400  | 3.15517800  | 1.14041200  | H | 1.19971500  | 5.27089700  | -4.33956500 |
| H | 4.69998100  | 3.49091600  | -0.56356200 | C | -4.93363200 | 0.52870000  | -3.74218800 |
| C | 2.22663600  | 3.46477200  | -3.76672600 | H | -5.32628800 | 0.30680500  | -4.73581200 |
| H | 2.45104400  | 3.18271800  | -4.79733100 | C | -1.26733200 | -2.61823800 | -4.28282200 |
| C | -3.65706400 | -3.90055900 | -0.96972200 | H | -1.65487100 | -3.63732300 | -4.13175500 |
| H | -4.28472600 | -3.75693300 | -0.07860900 | H | -0.28243500 | -2.71848900 | -4.76266300 |
| H | -3.31043500 | -4.94037900 | -0.99783800 | C | 3.43556900  | 1.38191600  | -3.08297300 |
| C | -6.09188000 | 0.13065800  | -0.13609700 | H | 3.68890100  | 0.85394200  | -2.15859100 |
| H | -5.48725700 | 0.21490000  | 0.77983800  | C | -7.26081400 | 1.12842800  | -0.07831500 |
| C | -2.17412300 | 3.70662300  | -2.81976400 | H | -6.93790200 | 2.17857400  | -0.12464300 |
| H | -2.40332100 | 3.65728300  | -3.89494900 | H | -7.84872500 | 0.98385800  | 0.83978600  |
| H | -1.27456900 | 4.32429600  | -2.69372100 | H | -7.93352000 | 0.96834800  | -0.93405500 |
| H | -3.01709600 | 4.20696200  | -2.32029900 | C | 1.90478200  | -0.62467200 | 3.47560800  |
| C | -1.28436200 | 4.17225800  | 4.35761600  | H | 1.29050500  | -0.92324700 | 2.61419900  |
| H | -2.37703300 | 4.06186200  | 4.40904300  | H | 1.34738500  | 0.13297300  | 4.04106600  |
| H | -1.05907000 | 5.16801200  | 3.94773900  | H | 2.03681200  | -1.50445800 | 4.12484700  |
| H | -0.90655700 | 4.14449500  | 5.39050900  | C | -6.65481500 | -1.29408100 | -0.16365900 |
| C | -1.57185600 | -0.86514400 | 5.00262300  | H | -7.31622700 | -1.44883400 | -1.02890600 |
| H | -1.80273500 | -1.85526400 | 5.40017800  | H | -7.25835900 | -1.46971700 | 0.73889900  |
| C | -3.71563400 | 1.17686500  | -3.60298400 | H | -5.84679000 | -2.03276700 | -0.19359100 |
| H | -3.15728900 | 1.48094600  | -4.49036200 | C | 4.98412200  | -2.68415100 | -2.33598100 |
| C | -5.67036100 | 0.18755700  | -2.60978800 | H | 5.49452600  | -3.62518300 | -2.08171300 |
| H | -6.64464000 | -0.28958400 | -2.72873700 | H | 5.25043300  | -2.43830900 | -3.37481900 |
| C | 2.48932200  | -5.00867000 | -0.57775700 | H | 3.89994100  | -2.85565800 | -2.28682800 |
| H | 2.25272900  | -4.94389400 | -1.64808000 | C | -2.38550300 | -2.75198700 | 2.67221500  |
| H | 2.73200200  | -6.05344200 | -0.33004800 | H | -1.51388400 | -2.57361800 | 2.02521900  |
| H | 3.37730800  | -4.39354800 | -0.36834600 | H | -3.09135100 | -3.39170600 | 2.12161500  |
| C | -0.15310600 | 4.99117500  | 0.47361400  | H | -2.04094900 | -3.31250700 | 3.55499800  |
| H | -0.43934000 | 5.86582100  | -0.12945500 | C | -4.29284600 | -1.71598100 | 3.95689600  |
| H | -0.35804500 | 5.24175500  | 1.52580500  | H | -4.02045000 | -2.26794100 | 4.86873800  |
| H | -0.79727400 | 4.14595100  | 0.18301300  | H | -5.02390200 | -2.32278200 | 3.40292800  |
| C | -0.75403000 | 1.61075200  | -2.91664000 | H | -4.78506900 | -0.78235300 | 4.26664600  |
| H | -0.64761700 | 0.57191900  | -2.56616400 | C | 2.22463500  | 5.80615100  | 0.70051200  |
| H | 0.17260100  | 2.15783500  | -2.70099100 | H | 3.28950400  | 5.55226500  | 0.59671200  |
| H | -0.87948200 | 1.58568100  | -4.01149800 | H | 2.04129900  | 6.09492000  | 1.74658400  |
| C | 1.47013100  | -4.54784000 | 2.28870400  | H | 2.02979500  | 6.68648700  | 0.06926500  |
| H | 2.32300300  | -3.90028100 | 2.53875700  | C | -4.39200200 | -3.51132600 | -2.23687900 |
| H | 1.73457000  | -5.58112400 | 2.56083000  | H | -3.76690200 | -3.70439500 | -3.11933500 |
| H | 0.61368400  | -4.24357700 | 2.91112600  | H | -4.65869600 | -2.44402000 | -2.21764400 |
| C | 6.91713300  | -1.28363500 | -1.51831500 | H | -5.31576100 | -4.09851100 | -2.33206700 |
| H | 7.24427700  | -0.46968400 | -0.85489200 | C | 4.09925700  | 0.38693800  | 4.21314100  |

|   |            |             |             |   |             |             |             |
|---|------------|-------------|-------------|---|-------------|-------------|-------------|
| H | 4.30698500 | -0.45159200 | 4.89415100  | H | 1.63476500  | 0.18356600  | -3.39513500 |
| H | 3.56495400 | 1.15874800  | 4.78684600  | H | 3.11905900  | -0.52543100 | -4.07614000 |
| H | 5.06463900 | 0.80242600  | 3.88938800  | H | 2.33398800  | 0.84841100  | -4.89449800 |
| C | 4.75579500 | 1.70367100  | -3.79093200 | C | -2.21180100 | -1.75729500 | -5.08512000 |
| H | 4.57985300 | 2.17551000  | -4.76910900 | H | -1.79233900 | -0.75092900 | -5.22224000 |
| H | 5.33030800 | 0.78089400  | -3.96488800 | H | -3.17674500 | -1.65795400 | -4.56869800 |
| H | 5.37628300 | 2.39214900  | -3.19738400 | H | -2.38138200 | -2.20395300 | -6.07382500 |
| C | 2.57764800 | 0.41840700  | -3.91073300 |   |             |             |             |

## S5: References

- [1] a) Z. Li, X. Chen, D. Andrada, G. Frenking, Z. Benkő, Y. Li, J. R. Harmer, C.-Y. Su, H. Grützmacher, *Angew. Chem. Int. Ed.* **2017**, *56*, 5744–5749; *Angew. Chem.* **2017**, *129*, 5838–5843; b) Z. Li, Y. Hou, Y. Li, H. Alexander, X. Chen, *Chem. Eur. J.* **2018**, *24*, 4849–4855.
- [2] M. J. Frisch, G. W. Trucks, H. B. Schlegel, G. E. Scuseria, M. A. Robb, J. R. Cheeseman, G. Scalmani, V. Barone, G. A. Petersson, H. Nakatsuji, X. Li, M. Caricato, A. V. Marenich, J. Bloino, B. G. Janesko, R. Gomperts, B. Mennucci, H. P. Hratchian, J. V. Ortiz, A. F. Izmaylov, J. L. Sonnenberg, D. Williams-Young, F. Ding, F. Lipparini, F. Egidi, J. Goings, B. Peng, A. Petrone, T. Henderson, D. Ranasinghe, V. G. Zakrzewski, J. Gao, N. Rega, G. Zheng, W. Liang, M. Hada, M. Ehara, K. Toyota, R. Fukuda, J. Hasegawa, M. Ishida, T. Nakajima, Y. Honda, O. Kitao, H. Nakai, T. Vreven, K. Throssell, J. A. Montgomery Jr., J. E. Peralta, F. Ogliaro, M. J. Bearpark, J. J. Heyd, E. N. Brothers, K. N. Kudin, V. N. Staroverov, T. A. Keith, R. Kobayashi, J. Normand, K. Raghavachari, A. P. Rendell, J. C. Burant, S. S. Iyengar, J. Tomasi, M. Cossi, J. M. Millam, M. Klene, C. Adamo, R. Cammi, J. W. Ochterski, R. L. Martin, K. Morokuma, O. Farkas, J. B. Foresman, D. J. Fox, Gaussian 16, Revision C.01 ed., Gaussian, Inc., Wallingford CT, **2016**.
- [3] A. Bondi, *J. Phys. Chem.* **1964**, *68*, 441.

- [4] *NBO 7.0*. E. D. Glendening, J. K. Badenhoop, A. E. Reed, J. E. Carpenter, J. A. Bohmann, C. M. Morales, P. Karafiloglou, C. R. Landis, and F. Weinhold, Theoretical Chemistry Institute, University of Wisconsin, Madison, WI (**2018**)
